# Supplementary material
Source: MDPI journal article supplement (https://www.mdpi.com/2072-4292/14/10/2394)
Supplement: s1 [file s1]

Archive with 8 entries (8 files):
- ESM1.pdf
- ESM2_acoustic_metrics.csv
- ESM3_environmental_variables.csv
- ESM4_fish_taxo.csv
- ESM5_fish_functional_richness.csv
- ESM6_fish_functional_distrib_nb_species.csv
- ESM7_fish_functional_distrib_abund.csv
- ESM8_fish_functional_distrib_log_biom.csv
