# Supplementary material
Source: MDPI journal article supplement (https://www.mdpi.com/2072-4292/14/10/2394)
Supplement: s1 [file s1 › ESM2_acoustic_metrics.csv]

site	numsample	spl_0.1_20	spl_0.1_0.5	spl_0.5_1	spl_1_2	spl_2_7	aci_0.1_50	aci_0.1_0.5	aci_0.5_1	aci_1_2	aci_2_7	h_0.1_50	h_0.1_0.5	h_1_2	bi_0.1_50	bi_0.1_0.5	bi_0.5_1	bi_1_2	shshan_0.1_50	shshan_0.1_0.5	shshan_0.5_1	shshan_1_2	th_0.1_50	th_0.1_0.5	th_0.5_1	th_1_2	ndsi_a0.1_1_b2_7
EUR1	1	94.92	74.75	68.37	70.25	88.46	2888.900212	22.85876905	27.30242322	62.27188384	301.3190065	0.968650744	0.510186250049993	0.571500191988397	2057.724773	5.983422223	3.797465746	10.41845507	0.985281919	0.517918593467099	0.528400491558212	0.583250438658601	0.98312039	0.985070349829799	0.986002769926707	0.979853857123145	0.933247528
EUR1	2	96.01	71.03	67.5	70.81	90.99	2845.46019	23.40599895	28.31053712	63.12994158	300.9937349	0.969128567	0.509769051844154	0.570827075836306	1859.25845	4.29703119	2.215798424	8.626867436	0.98523545	0.517648856890662	0.528706030478116	0.582871025213635	0.983651743	0.984777702217214	0.985325748336088	0.979336853512465	0.945584466
EUR1	3	94.09	70.72	69.54	70.86	88.61	2884.813356	24.17850141	29.45702657	65.12404588	299.8118229	0.969218002	0.511184581613527	0.569827441751484	1841.575196	3.656145567	1.734612713	7.459072413	0.985870626	0.519468242656097	0.528478107042297	0.582767994916077	0.983108712	0.984053575633006	0.983858916325295	0.977794674248614	0.92191592
EUR1	4	94.7	70.23	66.33	72.19	89.82	2873.428765	25.21335651	30.57569795	64.73581292	295.6012816	0.96896101	0.499141866420511	0.569681208522593	1781.435022	3.19543932	1.708216687	5.154563573	0.98552015	0.509496067870411	0.528835145457362	0.583101042591336	0.983197563	0.979677563571437	0.981550478077001	0.976985405464026	0.888581297
EUR1	5	94.02	72.93	69.02	70.09	88.17	2917.768866	24.66794877	30.50447625	65.17436648	290.7808969	0.96904748	0.499023451556139	0.57147384171291	1881.83607	2.099845485	1.744671539	3.11192422	0.985123463	0.508493638444519	0.527833163423776	0.583159799881281	0.983681251	0.981375997313656	0.9848156738437	0.979960967524254	0.894136605
EUR1	6	95.64	70.06	68.77	71.17	90.61	2962.335111	24.81131483	30.6990741	67.79309599	303.1442334	0.968582841	0.508141862578345	0.56987180510384	1811.48894	1.724665468	1.382746071	4.577610988	0.985322637	0.517027206954604	0.527979476012811	0.583016112703969	0.983010848	0.982814551619836	0.98304553789608	0.977454640937508	0.882321845
EUR1	7	93.68	70.43	67.08	68.95	88.07	2890.194164	23.48728487	27.86504799	60.49348822	288.3298385	0.969355823	0.511557221643704	0.572779651108712	1968.180672	3.180347108	3.167407891	3.64227801	0.985622879	0.518908897606017	0.527718265993425	0.583543416709716	0.98349566	0.985832434178272	0.986219967335343	0.981554473424282	0.924235527
EUR1	8	95.16	71.11	68.28	71.25	89.59	2866.016271	22.89322114	27.20753436	59.23134129	287.0199238	0.968482578	0.505177033873458	0.572636102779552	2037.014012	4.647226032	3.29912333	6.126658714	0.984851554	0.513802357091218	0.52804678442054	0.583595528886353	0.983379245	0.983212760512447	0.986434918757541	0.981220853203391	0.934761599
EUR1	9	95.35	69.97	68.56	71.42	90.76	2816.376397	22.69871894	27.42705679	59.31600114	286.314105	0.968942099	0.508238267712653	0.573104123731759	1946.451501	4.504797705	2.985969917	5.64046284	0.984950572	0.516101683425875	0.527916466140369	0.583788630836137	0.983746928	0.984763824715656	0.986628535297146	0.981697987011027	0.942352952
EUR1	10	96.81	70.56	68.67	70.91	90.03	2836.099041	22.94236031	27.69763316	59.65305172	283.4517183	0.969429369	0.511018684951165	0.573235551479786	2012.850011	6.195362325	3.250750133	5.627185944	0.985569071	0.51981437929852	0.527809710077998	0.583910465039219	0.983623977	0.983079163067354	0.985828984621033	0.981718235588198	0.929385033
EUR1	11	93.76	71.98	68.49	71.25	88.49	2842.057793	23.16054209	27.64145641	59.33611526	287.3108488	0.969401225	0.513799404692745	0.572093564939181	2350.18967	5.676804314	3.178978034	9.366492561	0.985961231	0.521279204209012	0.528198183172748	0.583494048127545	0.983204202	0.985651068648293	0.985682528007884	0.98046169755296	0.943136597
EUR1	12	95.22	71.26	69.09	69.89	88.58	2816.803563	23.16352408	27.09854999	58.6325206	289.8452839	0.969381938	0.512327098520316	0.573097540637571	2158.677229	5.709657942	3.949940545	7.19674533	0.985403179	0.520239490489762	0.528125621075934	0.583562110335828	0.983741435	0.984790866295063	0.986639649684362	0.982067770485931	0.942773062
EUR1	13	95.01	69.58	69.38	73.49	89.26	2779.014435	23.30373026	28.05419385	59.68348678	283.8589377	0.969990456	0.514279719733784	0.572757579025987	1941.925292	5.570834636	3.044292747	6.919456688	0.985972304	0.521587252519619	0.527474878015188	0.583933354251948	0.983790774	0.985989817138868	0.985414315265459	0.980861214478358	0.933835884
EUR1	14	95.19	71.29	69.31	71.13	89.35	2792.333753	22.77508079	27.19442174	58.69624921	285.5556711	0.969927525	0.51255778649942	0.572850644038601	2205.390811	5.446469992	3.302812428	10.041456	0.985789499	0.521096950816631	0.527764035413015	0.583170777495898	0.98390937	0.983613098668434	0.986756678483105	0.982303411186665	0.94193988
EUR1	15	93.11	73.41	71.23	72.93	87.35	2777.703106	23.18409868	27.84380729	60.16154626	291.026085	0.970121221	0.514054081495523	0.572219248463231	1898.138211	5.842002023	3.717234519	12.76150013	0.986090274	0.521608861118467	0.528035635542135	0.583218001811653	0.983805688	0.985516389413431	0.98565827749474	0.981141265677232	0.936247289
EUR1	16	93.38	70.62	68.15	69.96	87.56	2844.442432	23.28156202	28.91485188	61.97332521	298.1605033	0.969729076	0.514087278039697	0.572425253078932	1954.332696	3.519693956	1.955588383	3.548305422	0.986046504	0.52233516607724	0.527677118936135	0.583251785336696	0.983451664	0.984209586921967	0.985840313623676	0.981437635460448	0.937111698
EUR1	17	96.99	71.02	72.49	82.82	93.85	2847.734042	24.04599213	29.10414026	61.23796028	291.7548106	0.969833858	0.513012083572267	0.572239081647485	1984.773102	3.073728949	3.149836207	7.933987835	0.986107841	0.521197022057163	0.528307281910559	0.5832103641212	0.983496751	0.98429588401601	0.985337017824238	0.981188121561853	0.925803455
EUR1	18	94.7	71.09	68.01	69.18	88.67	2862.220138	25.296011	30.65702629	64.39968294	292.1766209	0.969720466	0.510288169164572	0.571613153124082	1885.659467	1.699570318	2.42815818	5.131326809	0.986079758	0.519847129889212	0.528216200178752	0.583557778812901	0.983409768	0.981611977492927	0.984106994389272	0.979531374402861	0.899213117
EUR1	19	94.64	69.56	67.74	69.79	88.49	2823.386855	23.59847167	27.8772372	59.98585088	287.2940646	0.970392223	0.513482934081365	0.57177532000333	1914.778341	5.411343032	3.209231184	7.814360553	0.986292354	0.521521566507898	0.528362462805044	0.582865233078824	0.983878886	0.984586193663361	0.985428334419032	0.980973452444719	0.928321773
EUR1	20	95.45	71.97	69.08	70.86	88.08	2850.810603	23.33010461	28.08440815	59.32034414	290.7401513	0.969570372	0.51334902024416	0.572652621827463	1884.362371	4.74566892	2.777537425	6.678427513	0.98593891	0.521020566053757	0.528160743761005	0.583087237510469	0.98339802	0.985275925156464	0.986097139974089	0.982104537688807	0.935624031
EUR1	21	95.91	73.19	69.6	72.49	89.06	2830.163818	24.12902568	29.03803542	61.5750913	286.2663266	0.970121924	0.513634339149271	0.571685388637789	1799.939687	3.604292862	1.862818769	4.790370355	0.986206234	0.521455924314687	0.528153248497512	0.582894944222642	0.983690723	0.985000486521089	0.984717754214397	0.980769166560877	0.904987679
EUR1	22	94.06	68.41	67.73	70.4	88.64	2831.808236	23.86173804	28.16319532	59.22405109	286.3625495	0.969747667	0.513163196599716	0.572618481765333	2053.286143	5.398235338	3.823235384	7.135189996	0.985954552	0.520738000727682	0.528290893902989	0.583364228714678	0.98356224	0.985453713542356	0.985519535190988	0.981579695119427	0.935745651
EUR1	23	93.35	77.05	70.17	69.97	87.33	2851.472155	24.64981744	29.72011189	62.41434714	285.1881562	0.969768854	0.51338343609037	0.571490642173769	1822.772758	2.889313693	2.198563383	3.412931186	0.985977244	0.521280096545966	0.528192157357795	0.582898769998741	0.983561091	0.984851406167396	0.984237237321257	0.980428629442815	0.923698743
EUR10	1	91.75	73.01	66.96	67.98	87.31	3059.459179	24.44336479	28.87040909	61.21422537	317.4375332	0.969584571	0.511503160218143	0.573324925430346	1950.563355	8.31773571	4.310390826	8.915616859	0.989393233	0.519873607050616	0.527905503280488	0.584103684893745	0.97997898	0.983899073315221	0.985074481864495	0.981546496380417	0.841743053
EUR10	2	90.43	78.23	76.8	74.34	85.34	3038.628421	24.36167324	29.36213028	62.35870921	319.9727244	0.96990831	0.510603822937987	0.572464346339786	2056.08967	9.194882165	4.719767679	6.9196987	0.989448581	0.518954176723047	0.528344378550278	0.584024050537383	0.980251353	0.98390926567392	0.984149789312506	0.980206801094988	0.857208637
EUR10	3	89.86	71.68	67.96	68.27	83.99	3041.327721	24.31992005	29.89737877	63.32125283	323.6685134	0.969820862	0.509722972783929	0.571718130634952	1955.521397	12.06275115	3.706143996	6.117060933	0.989560822	0.518600296012343	0.528743002450307	0.583934954072954	0.980051798	0.982882147779948	0.98226290698209	0.979078451541924	0.837136459
EUR10	4	90.75	74.82	71.23	73.27	86.99	3073.429862	23.74454983	28.27302577	60.69694729	321.302012	0.969385772	0.510240819979121	0.573008216646402	1985.374262	11.56830536	4.933139266	10.78365815	0.989282735	0.518892889075459	0.527982146529102	0.584445120159569	0.979887486	0.983325905445045	0.984656136708516	0.980431176309515	0.82226009
EUR10	5	89.71	71.93	68.88	67.73	84.14	3076.102336	24.81748115	29.95184489	64.50568483	313.9637801	0.970535374	0.510370155856749	0.572075752080587	1839.346092	11.35677965	2.820931732	7.880544983	0.989928284	0.518784844425072	0.528395594597168	0.583957205181779	0.980409782	0.983780003100036	0.983870458355069	0.979653555096571	0.802166709
EUR10	6	94.24	72.44	69.09	71.05	87.89	3070.074291	24.31980684	29.79603784	64.76036301	324.7472015	0.970303589	0.509895288617255	0.57171240961856	1937.842976	9.338624472	4.151023884	10.68097453	0.989877147	0.518589733585313	0.527977580155127	0.583805974388251	0.980226275	0.983234444484759	0.982629681075338	0.979284958872914	0.830686657
EUR10	7	89.82	76.71	69.66	69.51	83.79	3104.245536	24.62679551	29.92712984	61.76040649	328.8214942	0.970375843	0.510027163591339	0.573027922596121	1793.334756	10.65685117	3.639265258	7.597749201	0.990240556	0.518429014711332	0.527348593379801	0.584466345414984	0.979939507	0.98379363252909	0.983784680759774	0.98042928748833	0.815851028
EUR10	8	88.18	74.36	68.84	68.29	82.7	3063.299306	23.84579718	29.21193348	61.84073221	320.5824644	0.96956664	0.510288729014537	0.571949697118248	2021.087652	10.19866845	1.933101058	5.262675495	0.989889453	0.518263618085903	0.528685826811112	0.583425135656274	0.979469614	0.9846122922909	0.984505360505468	0.980330915079417	0.826234314
EUR10	9	89.39	73.72	65.86	66.74	83.64	3037.219025	23.45577372	29.22670182	61.62920021	315.8387807	0.970320373	0.510122467456952	0.572600422983886	1952.623717	9.40198549	1.989560231	7.027922703	0.990193174	0.517804099454389	0.528406731358935	0.583789886058835	0.97993038	0.985164984198597	0.984546507043004	0.980833064528595	0.798017958
EUR10	10	89.71	73.1	66.57	68.61	84.19	2991.190675	23.67760028	28.58734426	59.14669946	308.4741971	0.970814475	0.508699539780794	0.572938239490209	1948.117459	12.34494249	4.174957706	4.825952999	0.989942482	0.517300413726462	0.528827268153768	0.583623495983604	0.980677659	0.983373541336047	0.98386691597282	0.981691524472663	0.791213263
EUR10	11	91.09	71.78	67.1	69.83	86.26	3039.363058	24.18110011	29.76584638	61.27632677	319.0407084	0.970767204	0.508242987058609	0.572787078577907	1981.157274	9.348194233	4.063600659	5.440504991	0.990260143	0.516906389269322	0.528847368005209	0.584249786152874	0.980315335	0.983239901091262	0.983134976320641	0.980380467658456	0.808881896
EUR10	12	91.43	73.64	67.48	68.24	85.38	3057.259779	24.28577882	29.80651544	61.68139744	324.5727619	0.970177719	0.508672343256204	0.572332029743159	2015.694074	12.60825848	4.680992392	8.525224543	0.98998875	0.517026672201657	0.529019011116979	0.584082443019672	0.97998863	0.983841590009511	0.983325446528384	0.97988226933211	0.823941953
EUR10	13	95.1	73.87	69.16	72.99	92.21	3058.876706	24.37021345	29.15129226	60.97214498	322.7197387	0.97029493	0.508880577505018	0.573237954711097	1858.811641	10.45388717	6.50976237	7.343223193	0.990019421	0.517473510312809	0.528879940125144	0.584409855738543	0.980076663	0.983394448920493	0.984108499454317	0.980883448631564	0.830967479
EUR10	14	90.18	73.55	69.27	71.46	85.1	3143.377777	24.79505773	31.52731485	65.6402225	333.5904833	0.970216933	0.509542124923443	0.571473336913154	1757.941126	9.155473063	3.177405314	4.331275059	0.990568571	0.518527848558825	0.528080421657604	0.584088094877777	0.979454589	0.982670701949073	0.981406749733785	0.978402644951592	0.834547271
EUR10	15	88.44	73.53	67.61	66.32	83.27	2993.368486	23.96748163	29.53709625	60.93693958	319.9269066	0.97055052	0.50964032740442	0.572452697217212	1905.941709	11.11599702	3.69571705	6.440440606	0.990177752	0.518218850597338	0.528268956962146	0.583868502883533	0.980178072	0.983446138281097	0.982425205131098	0.98044798510291	0.810254786
EUR10	16	100.46	85.69	81.53	83.56	92.42	3155.231258	24.29654216	29.11467499	60.97851932	332.0452129	0.969892125	0.508103188707792	0.572368469432785	1802.070951	10.83505446	4.349158601	8.620273198	0.990215022	0.517022106376448	0.529171258626209	0.583490842141037	0.979476279	0.982749446186808	0.983573193023358	0.980938222325067	0.815453618
EUR10	17	88.55	69.95	66.11	67.41	84.04	3067.315811	23.94967011	29.63830357	61.65375166	322.4128752	0.970447437	0.507980480834443	0.571422283381056	1710.441601	13.19837715	5.287459445	6.540711972	0.990533067	0.516618496419201	0.529536771023701	0.58329653085342	0.979722403	0.983279701279318	0.981935520431764	0.979642862859153	0.810717481
EUR10	18	88.68	74.03	74.11	69.9	83.01	3079.008705	24.10726923	30.82936325	62.47994813	324.5636742	0.969736882	0.509746979510888	0.570853033582835	1797.673573	9.89960002	3.15012035	6.575497267	0.990173505	0.518000151491269	0.529240072288476	0.58291672234804	0.979360563	0.984067240218714	0.981831512267946	0.979304610242418	0.84369019
EUR10	19	89.51	76.01	69.99	69.12	83.6	3052.523283	24.11311986	29.69733908	61.1119291	320.7850257	0.970203191	0.508269252613231	0.570714650147753	1833.863443	12.32220752	4.152922038	6.866252737	0.990532632	0.516762777496491	0.530324787061202	0.582640592250391	0.979476252	0.983563977025575	0.983408881762934	0.979531219998635	0.83851625
EUR10	20	89.78	74.66	67.84	69.55	83.8	3057.533959	25.2306125	31.81543751	63.74585946	321.2829237	0.970236522	0.509750834087785	0.570315994444971	1990.545655	9.757753848	4.055058646	5.512399272	0.990477375	0.518726401380341	0.529019294248776	0.582694110555893	0.979564547	0.982696914464596	0.980939471230832	0.978757094182549	0.82356333
EUR10	21	95.3	73.52	69.11	73.86	92.47	3123.643944	24.10722835	30.15538392	62.44938583	325.3626301	0.970200429	0.510354353653828	0.570857214274328	1950.3176	9.761199357	2.664807547	6.124409406	0.990640425	0.518523616579352	0.52908585832212	0.582483478195139	0.979366887	0.984245147830651	0.982913527382709	0.980040182501252	0.828852333
EUR10	22	93.12	72.2	70.88	79.29	89.71	3082.427865	24.19081904	30.3338387	62.76681209	325.8605564	0.969386238	0.508250052565877	0.57026511715946	2023.276846	10.23293134	4.797395215	9.517729618	0.990318203	0.517818036965634	0.528861518019174	0.58295223275219	0.978863394	0.981522496868157	0.979675914305012	0.978236440517892	0.819948181
EUR10	23	89.51	70.71	66.7	69.58	84.56	3066.540027	24.87020656	30.75190042	61.68657507	315.7044109	0.97016927	0.507760695748714	0.571048097682384	2020.33974	8.386696958	6.116360709	7.782662158	0.990541712	0.516762745209601	0.529251040030426	0.582724629126896	0.97943303	0.982579917874621	0.98242320950968	0.979962179628469	0.799245663
EUR10	24	88.35	78.81	68.7	68.23	83.3	3174.297138	25.99865716	32.60648915	66.37452186	333.6243809	0.969230012	0.50779603705371	0.568566835973258	1980.759161	8.660682516	2.187720294	5.811251931	0.990369807	0.517630522757906	0.529787142622545	0.582301842617718	0.978654646	0.98100095478953	0.979544148882619	0.97641256537552	0.815278707
EUR11	1	93.65	70.59	66.46	67.6	88.57	2828.76963	24.02531047	30.11391019	58.09362568	283.033606	0.971674348	0.506726983423585	0.572596980046179	1904.229784	13.19875557	4.108685053	9.953762134	0.989245235	0.515721789378596	0.528788762167405	0.583605749885757	0.982238087	0.982558801779835	0.98113620800057	0.981136632321164	0.780436933
EUR11	2	91.81	70.35	66.48	66.6	84.66	2876.893136	24.68585505	30.90292566	62.5761491	295.1043505	0.971707137	0.507666180613385	0.571698147120717	1907.727115	10.01285201	2.541441442	6.422708853	0.989038274	0.516247042016762	0.528995715220863	0.583452334796236	0.982476778	0.983378381462769	0.980774707854847	0.979854073804291	0.787136417
EUR11	3	88.43	69.01	64.44	66.27	82.66	2877.771731	24.26054458	30.11826402	58.60412523	290.148464	0.971102174	0.507534367415396	0.572066010563313	2018.409225	12.27554956	5.822176258	9.165704805	0.988965894	0.515984449800348	0.528999673254253	0.583516079391094	0.981936971	0.983623377820357	0.98118577760192	0.980377457910449	0.817725932
EUR11	4	88.69	75.49	66.87	68.36	82.44	2846.016741	24.26249033	30.15559627	59.86222429	290.5358974	0.971629153	0.502902163655462	0.572571286867197	1733.120156	12.67376198	4.872367439	7.279364989	0.988564396	0.511263245974444	0.528333315592411	0.583865823038596	0.982868851	0.983646228464857	0.981051249673222	0.980655596327562	0.807866922
EUR11	5	90.13	70.42	65.16	66.06	85.72	2855.036576	23.93918093	30.2757992	60.25934094	298.8568005	0.970679318	0.500564723421431	0.572289232130458	1871.175787	12.19002724	3.711517029	9.381687456	0.988002514	0.509314008093816	0.528519661326406	0.583728180702182	0.982466445	0.982821433274276	0.980589083512282	0.98040363828595	0.828402454
EUR11	6	92.39	71.96	64.41	67.05	86.65	2927.621961	24.47748563	30.48220236	61.09144971	299.8276477	0.971562528	0.501396113050106	0.571665985802939	1665.260494	13.775363	3.016843704	7.980478249	0.988822837	0.510063211322406	0.528760203272428	0.583352814544468	0.982544589	0.983007795740004	0.981052981912433	0.979966105502284	0.808672849
EUR11	7	88.26	71.59	63.96	65.72	83.45	2839.814266	24.09906366	29.57338108	58.936311	292.8865562	0.971540785	0.507819935560904	0.572691366632017	1714.529455	14.45242481	2.797001597	8.6154798	0.989160373	0.515949124056214	0.527933523034827	0.583903966709791	0.98218733	0.98424420525923	0.981370615881203	0.980797184610758	0.818364575
EUR11	8	87.8	71.69	64.92	64.97	82.36	2874.400257	25.22076998	32.74361863	63.84432214	293.3460418	0.971680362	0.50727343156179	0.570750507104059	1611.402144	13.25163842	3.03175783	8.322250256	0.989332376	0.517319968395882	0.527680576322849	0.583901750477839	0.98215765	0.980579646161263	0.975160986918929	0.977476958472865	0.728538118
EUR11	9	88.99	78.41	73.65	71.36	83.28	2905.993118	25.18159873	31.89550519	62.23314584	298.8516305	0.971021795	0.506736948660099	0.572015239838084	1849.864701	9.210981621	4.1405119	3.663907517	0.989256828	0.516370110967512	0.52860914592496	0.583853677616155	0.981566938	0.981344461844697	0.978580432570733	0.979723622147236	0.770649805
EUR11	10	89.12	73.07	65.64	68.51	84.42	2874.284481	24.41714313	29.58194799	59.84971996	302.3612262	0.971029151	0.50671334394427	0.572317640774312	1956.072274	12.24072255	6.613471178	11.78660189	0.989258812	0.515215011271976	0.52946497344138	0.583456018111395	0.981572404	0.983498797314315	0.982255286665231	0.980909653870505	0.799920039
EUR11	11	87.62	71.32	67.77	67.81	82.43	2808.524585	23.86374294	29.64533591	58.88226701	292.0632347	0.971261849	0.50757759723444	0.572252095041279	2004.164485	13.41899741	5.598969447	12.09921133	0.989207654	0.515842354578921	0.52859347442749	0.583611101339985	0.981858405	0.983978133491525	0.981825331573226	0.980536685692534	0.807919223
EUR11	12	87.09	71.54	68.6	65.86	81.27	2957.63569	25.11738587	30.74430541	63.4326054	307.7276142	0.970691434	0.507027280484887	0.571063897279896	1691.105626	11.89166579	3.897350473	10.20171227	0.98937672	0.515939880457046	0.529162206525972	0.583308276567991	0.981114083	0.982725506769774	0.98088041057296	0.979008733837727	0.804122714
EUR11	13	87.49	72.16	65.62	66.14	81.88	2911.462833	23.93157031	30.15847274	61.6397417	299.3772154	0.970910134	0.507191185037414	0.57129476836699	1734.407656	13.38992628	3.911187165	14.07888626	0.989586166	0.51577227384011	0.529273847851459	0.583218182216652	0.981127432	0.983362640378462	0.981143187410514	0.979555826252974	0.812246704
EUR11	14	87.35	69.86	65.1	66.66	81.01	2879.279609	24.72016766	30.34976589	60.62902113	299.9424315	0.971648762	0.507335376019644	0.571771821517211	1784.882796	15.07535223	3.041557843	9.577504857	0.990026077	0.516312401345768	0.528658819210765	0.583620103802826	0.981437544	0.98261319057469	0.980504364262332	0.979698639220252	0.755147578
EUR11	15	88.54	70.68	64.66	65.51	81.52	2892.240934	24.17441747	29.77283873	60.46626471	297.8012715	0.971454716	0.508589428167693	0.571594747047605	1759.589819	13.00324782	4.067474604	9.035829442	0.989963794	0.517088327173795	0.528858878039333	0.58369539675898	0.981303278	0.983563931809186	0.98055909736298	0.979268896450846	0.783881646
EUR11	16	87.76	69.9	68.33	66.76	82.9	2871.241302	23.93954635	29.98095807	61.74457539	299.0506628	0.971641027	0.508234362327493	0.569765578943263	1717.73614	15.1339514	4.519317131	18.93905935	0.989839366	0.516699637490663	0.528644485523673	0.583140921389082	0.981614857	0.98361664195415	0.980692463052151	0.97706327586485	0.77455122
EUR11	17	87.54	73.38	67.37	69.86	82.56	2821.97713	24.28389062	29.53744476	58.35989269	291.9542101	0.971268382	0.507396286047184	0.572345552136942	1816.805586	14.42767752	5.208765306	8.932894983	0.989352426	0.516062012871126	0.529529117207361	0.583532163845322	0.981721332	0.983207973832971	0.98174057094178	0.980829485671084	0.793266556
EUR11	18	86.4	71.15	67.14	66.69	80.4	2905.939528	23.76272354	28.98493247	59.19730298	299.1201122	0.971011188	0.508505728889226	0.572062737617582	1879.160463	14.89801246	4.56855637	8.942970793	0.989577289	0.516708137613926	0.529126220491102	0.583524043967279	0.981238352	0.984125644386835	0.982211744319293	0.980358467713218	0.798942884
EUR11	19	88.82	76.25	66.95	67.82	82.63	2831.543738	24.33121922	30.55347496	58.6914619	293.3751255	0.971141756	0.507733236378801	0.57274028628218	1887.722061	13.07299299	5.431762581	10.41964466	0.989317006	0.516182346150487	0.528701016159455	0.583936467334816	0.981628486	0.983631540608283	0.98065844225682	0.980826371225387	0.773125667
EUR11	20	89.85	72.32	66.05	66.91	84.48	2883.337687	24.22532097	30.74273095	61.35639255	300.9020994	0.971288996	0.508339636609793	0.57142055672011	1695.109948	12.49619285	6.109164588	13.88559176	0.98989425	0.516849046407293	0.528846083143432	0.583736576905515	0.981204806	0.983535986267846	0.980577151305819	0.97890140746243	0.78795818
EUR11	21	87.35	71.66	66.59	65.84	80.97	2889.431655	23.64936156	29.59878066	58.22557896	299.1721797	0.970911506	0.507371741332387	0.572874319620327	2054.153618	13.30552971	6.167053425	10.13805657	0.989463206	0.515430320721449	0.52972778605467	0.583776015414746	0.981250743	0.984365336952271	0.982285313332004	0.981325550371106	0.778118083
EUR11	22	96.13	70.87	67.1	70.19	90.2	2904.182636	23.80110332	30.12023428	59.31035596	299.0053531	0.969954249	0.507179027715299	0.571640536556062	2149.869362	11.55088586	5.783049317	11.73707446	0.988668741	0.516055171143908	0.529219296634143	0.583154710303679	0.981071019	0.982800010686972	0.981679789142308	0.980255370411702	0.828268127
EUR11	23	89.01	72.96	66.94	67.65	83.23	2891.365743	24.21315444	30.21616715	62.00847254	309.3687417	0.970847206	0.50815260164072	0.570875168557045	1719.525182	14.95140947	5.36386851	9.931960426	0.989308865	0.516378969627063	0.529662063749207	0.583390532583872	0.981338832	0.984069126610086	0.98084763248383	0.978547193813043	0.809792978
EUR11	24	87.87	71.12	65.14	66	82.33	2934.777457	24.93689446	32.27561249	64.80446609	311.5386497	0.970781766	0.506512718849985	0.570540268602503	1716.326585	11.86365826	3.401216894	4.522729405	0.989793347	0.515683876118902	0.529703532578332	0.583375106345687	0.980792373	0.982215543875561	0.979864392352915	0.977998996522868	0.764988562
EUR12	1	90.09	74.45	66.72	65.63	81.06	3091.931773	22.56976884	28.78106498	64.69597853	332.009002	0.969552633	0.506415754905813	0.571925078496349	1796.577623	12.03155781	5.236081008	10.63761459	0.989480023	0.513872591764295	0.5312051508227	0.583618918378122	0.979860745	0.985488938351664	0.985259260153342	0.979963226835981	0.750993156
EUR12	2	88.79	73.32	64.49	64.74	82.98	2998.976909	22.30454145	27.9120311	59.93979888	325.6823251	0.969439414	0.507914295168707	0.574008955760614	1732.538538	10.78217025	5.53785223	4.621974937	0.989221331	0.514527076149847	0.530391906179943	0.583935261513106	0.980002537	0.987147846463936	0.986441845017499	0.983001016710705	0.786490019
EUR12	3	88.41	73.73	65.86	64.95	81.8	2957.651068	22.19210923	27.54203268	59.25757899	322.9567468	0.970624867	0.508934872061296	0.574269312751175	1761.633196	11.17558032	5.397314153	9.543100351	0.989680007	0.515552542318756	0.529782508155748	0.583608825062025	0.980746161	0.987163926633555	0.987118516091674	0.9839969652449	0.759572383
EUR12	4	87.96	73.11	66.58	65.63	82.19	2962.270481	21.69691817	27.06916047	59.47455103	322.814507	0.970157672	0.508779643338959	0.573651576822351	1945.818357	12.23545358	5.824159942	9.120247659	0.989667579	0.515743381201001	0.529927363158902	0.583638359564863	0.980286404	0.986497668965086	0.986929234227691	0.98288874852236	0.743851404
EUR12	5	89.23	72.67	67.36	66.1	81.5	2963.59841	21.99574569	27.06945897	57.64050413	321.1105557	0.970826881	0.508173346238747	0.574425964887695	1962.935353	12.53892637	6.338613284	9.146784525	0.98974198	0.514931688814269	0.530075173814728	0.583788066700733	0.980888858	0.986875263802303	0.987282230609661	0.983963183992526	0.721972033
EUR12	6	87.5	75.84	66.09	65.77	80.26	3000.787108	22.59324105	27.70401106	59.63451882	322.5014185	0.970885955	0.507724000962527	0.573486848497475	1489.947021	11.68714098	4.635855525	8.261140937	0.990042316	0.514428976189555	0.5306100147077	0.583511387256766	0.980650967	0.986966178933597	0.986652706808538	0.982820320257299	0.743476785
EUR12	7	94.86	73.11	66.31	75.01	85.97	2994.663246	22.69438833	27.16365168	59.62200073	323.1371151	0.970771623	0.508077446248989	0.574060401970433	1967.279802	13.03467536	5.669047859	10.91683659	0.989879903	0.515004222292384	0.530008450184086	0.583700209011318	0.980696365	0.986550059701332	0.986972424215099	0.983485003273832	0.730898277
EUR12	8	87.2	79.01	65.82	64.83	79.55	2950.120622	22.46173523	26.77733971	56.96612197	316.3733312	0.970566624	0.508444092618895	0.574669851740856	1964.892249	13.66187568	6.323372347	7.268043745	0.989810931	0.51559593007217	0.52986180738745	0.583931467502255	0.980557593	0.986128987767081	0.987091620059589	0.984139207635076	0.745755791
EUR12	9	90.37	71.08	66.54	68.62	85.98	2972.147238	22.10956448	27.14305792	58.09134342	318.339917	0.971020131	0.509468588052014	0.574470420695751	1764.569476	10.17664906	5.277217185	6.168769233	0.989907511	0.515886740958852	0.529759939601315	0.583744687858903	0.980920055	0.987558988442097	0.986957061253292	0.984112459854378	0.761672036
EUR12	10	88.56	72.87	70.35	66.06	82.55	2913.750272	22.81014271	27.46867835	58.02616474	309.175083	0.971354706	0.508587348326523	0.574357517275867	1684.423429	9.152375948	6.859132534	10.83900136	0.990010845	0.51570781189761	0.529815307912434	0.583526472965172	0.981155621	0.98619283360303	0.986615076048342	0.984286992768789	0.734824702
EUR12	11	87.58	72.44	67.37	65.51	82.58	2910.340397	22.67914689	28.27170672	61.08574471	326.4153581	0.970796862	0.509006988937588	0.5735389737	1755.512503	11.25134473	5.523822732	11.76803967	0.989640671	0.515792262000629	0.529792820011515	0.584156611406201	0.980958939	0.986844949870472	0.985718130224844	0.981823987781903	0.741406978
EUR12	12	86.58	72.05	66.73	66.54	80.53	2981.569559	22.62235783	28.42498972	60.99461244	322.163266	0.971310837	0.509384991893765	0.573274313515191	1612.241668	9.487841164	6.357164518	7.524743804	0.990031774	0.516435597433647	0.529271534212211	0.583981485946762	0.98109057	0.986347560906104	0.985030541712448	0.981665219378979	0.725949871
EUR12	13	88.79	72.77	66.84	66.82	80.78	2998.379586	22.36523711	27.58698869	58.79276452	330.9528214	0.970560336	0.510669430410452	0.574812612582537	1824.323342	8.964239772	5.328451957	9.734216723	0.989641342	0.517716088566426	0.528526480997337	0.584141430783972	0.980719272	0.986388952726025	0.986674864446984	0.98402986381412	0.758946637
EUR12	14	87.95	72.51	67.85	68.02	81.85	2901.149585	22.4030759	27.00426195	56.174863	312.0218764	0.97129937	0.509554426296055	0.574802459549532	1676.04459	11.52356006	5.996319298	5.989964505	0.989755497	0.516578538280857	0.529637127629273	0.583765072912108	0.981352842	0.98640262522679	0.98706935396303	0.98464688317534	0.723722912
EUR12	15	86.48	71.56	67.17	67.37	79.95	3019.307146	23.05340427	27.90906145	59.37066414	322.0732436	0.97035235	0.50913799212358	0.573814772596038	1880.621387	11.86247544	6.184234359	9.403712455	0.990021053	0.516458135444851	0.529476353550401	0.583678862431338	0.980133046	0.985826260022092	0.986174786352786	0.983100142098327	0.730505569
EUR12	16	88.65	71.44	67.65	66.93	82.38	2958.633529	23.00879574	27.16406456	56.62479873	314.5033877	0.970922777	0.50977545667916	0.574992781350659	1664.937032	10.5510753	5.219984729	5.727038835	0.990021979	0.516957998694706	0.528765969853477	0.583361269821037	0.980708305	0.986106140085499	0.987382344296535	0.985654706777252	0.727981618
EUR12	17	88.69	71.97	67.37	67.36	83.04	2994.437347	22.91870396	27.60394117	59.30338271	331.5866047	0.970482105	0.510034252524706	0.573691339299851	1830.022191	11.16387987	6.255169965	11.27250941	0.990055455	0.51700023769116	0.529156274974077	0.583637643277467	0.980230046	0.986526147071881	0.986445252327331	0.98295808350921	0.793097913
EUR12	18	87.87	71.35	66.41	67.24	82.06	2976.510174	22.59175865	27.44298231	59.5819969	327.9616672	0.971137383	0.508897603954205	0.573716652963822	1816.378477	12.48233492	5.587605829	7.523090871	0.99039492	0.516129154477396	0.529600596081995	0.583785084628203	0.9805557	0.985988874179151	0.98631668335589	0.982753187894834	0.773002175
EUR12	19	87.53	71.81	65.67	66.45	81.04	2936.818711	23.57814138	27.52131096	56.83645449	318.6226536	0.971190382	0.50890183039208	0.574382771927609	1853.193858	12.35232747	6.711637033	6.715528804	0.990370604	0.516398451294427	0.529101401015905	0.58374461526758	0.980633289	0.98548287493203	0.985655033609776	0.983962433065562	0.735370591
EUR12	20	87.26	71.53	66.23	66.93	81.51	2915.060656	22.93923771	27.47237706	57.64568607	310.5293771	0.971266407	0.509628630631678	0.573956158944719	1789.751364	10.83160277	5.074765427	5.239201761	0.990326625	0.516529672001722	0.529539358587739	0.583360190869053	0.980753605	0.986639603213305	0.986473452635181	0.983879544625208	0.766550793
EUR12	21	92.8	72.89	67.36	71.95	85.66	2944.344754	22.63159079	27.5170393	56.4775599	313.9656936	0.971411746	0.508858704725252	0.574927531437796	2013.058715	11.64180811	6.604043518	7.335207567	0.990266503	0.51603241228387	0.529298501839101	0.583640122943908	0.980959916	0.986098339197594	0.986722495668531	0.98507197986635	0.729715917
EUR12	22	89.67	72.14	65.73	66.51	84.14	2986.571253	22.89501314	27.78340218	59.51099191	327.0067783	0.97081489	0.508483845888861	0.573206009960226	1840.629446	12.1223207	5.547051206	8.203017339	0.990440647	0.515749129610155	0.529822639160015	0.583488639445249	0.980184823	0.98591314399932	0.985943043225429	0.982377327012229	0.788047786
EUR12	23	89.12	71.48	64.39	65.15	82.49	2915.919161	22.57555841	27.40831434	57.33782816	313.3818251	0.972096591	0.509030242049182	0.574625666736886	1791.957778	11.08927504	6.261279943	6.695369916	0.99087675	0.516107246695371	0.529293511243201	0.583799353969532	0.981046927	0.986287724709345	0.986614782839943	0.984286232640941	0.742992332
EUR2	1	92.82	71.96	73.02	73.29	87.51	2697.840157	24.17127894	28.52147809	56.07547048	269.1319888	0.971220651	0.511387199524233	0.571362826773725	2106.640269	9.45546717	3.027352039	12.94731828	0.987005488	0.51989855518132	0.528974413889119	0.580995309854661	0.984007346	0.983628814559565	0.983988605804593	0.983420721445505	0.923648291
EUR2	2	92.47	71.37	67.13	69.52	86.72	2851.446093	25.64037525	32.7801642	63.86861902	285.1564965	0.97122909	0.511016152573553	0.569771123392204	1898.878751	5.608631243	1.956580107	10.39381625	0.987702164	0.52052136466335	0.528360530913942	0.580996659274744	0.98332182	0.98173905484947	0.980555159077699	0.980678828865294	0.907098812
EUR2	3	100.49	79.6	80.52	85.4	96.52	2772.369027	25.82725057	31.24201704	59.95786111	278.8079796	0.970993112	0.50971455855973	0.570566659968283	1826.065632	6.916160936	2.445848834	9.015727804	0.987217199	0.519223426004089	0.529335471879376	0.581083537179166	0.983565839	0.981686366661962	0.981774397089444	0.981901264554945	0.913127393
EUR2	4	93.96	70.49	69.87	73.06	88.48	2728.077158	24.76170127	29.51196042	56.51492044	272.9169612	0.971439963	0.509622019557724	0.571818043349704	2098.345564	8.796475104	2.960086218	12.254103	0.987355253	0.518877565666364	0.528761439678291	0.581654487312033	0.983880888	0.982162369851638	0.983019297799991	0.98308885398996	0.912592038
EUR2	5	92.1	69.43	67.97	71.19	86.86	2769.515275	25.83863483	30.69951253	58.55428724	277.52886	0.971143275	0.508344139341853	0.571152782231061	1939.893542	9.951950691	3.730999893	12.28996474	0.987357589	0.518500909942736	0.529151997784704	0.581405691747767	0.983578073	0.980411277191385	0.98151175363293	0.982365309348994	0.891173985
EUR2	6	92.18	73.63	73.96	72.16	86.7	2768.935054	25.16008515	30.84783732	58.69866017	276.0252593	0.971202693	0.509896944327016	0.571398178491052	1703.947692	8.817572557	4.067583793	10.38111248	0.987335945	0.519337794555791	0.529037884563043	0.58140166826012	0.983659815	0.981821368812856	0.98226116854899	0.98279418461422	0.899222617
EUR2	7	92.24	68.78	69.16	71.4	86.73	2779.284825	24.47325896	30.49683697	58.32905356	280.5286943	0.970928561	0.510234260379925	0.571549718517105	1808.325485	7.382986195	3.22731129	11.76327325	0.987242091	0.519197148147846	0.528810122342469	0.581527744375409	0.983475654	0.982737024269307	0.982454413563582	0.982841702816739	0.916061816
EUR2	8	94.21	73.75	69.79	70.45	87.63	2779.531394	25.05796371	29.66787206	57.56165877	278.823158	0.970522315	0.510634478926052	0.571556148181706	2102.554016	10.4073857	3.23178559	12.14593566	0.987096829	0.519454300148213	0.528719669498128	0.581709636971448	0.983208827	0.983020987178958	0.982819481520103	0.982545434793544	0.916272733
EUR2	9	93.03	71.9	67.51	70.37	87.32	2749.817844	24.75104981	29.33272519	56.23404364	272.2436247	0.970872025	0.511179465154234	0.571802687418089	2151.554018	11.07253143	2.488208812	12.34435791	0.987064289	0.520091852363425	0.529085421962184	0.581484809435963	0.983595532	0.982863820748794	0.983266981462601	0.983349312207716	0.92254314
EUR2	10	92.82	72.22	70.39	71.6	87.87	2786.691547	24.75426547	30.06240434	58.62372196	279.6465702	0.970617109	0.51101067256721	0.571149506203975	1726.983436	9.665650022	2.085524436	12.21245741	0.987091628	0.51983794936526	0.52901249507736	0.581561244384731	0.983310041	0.98301917586273	0.982755103194981	0.982096918800408	0.918985778
EUR2	11	93.23	69.91	68.51	70.58	87.26	2787.111016	24.30402239	29.71567953	59.00514047	279.2917103	0.970776472	0.511929912697695	0.570521842365425	1796.772852	9.050051585	2.568581734	12.38274803	0.987237552	0.520638773523467	0.529275726731252	0.581113439193072	0.98332612	0.983272738665171	0.982904273682853	0.981773615763637	0.923509599
EUR2	12	93.76	80.64	73.55	71.77	88.08	2773.192244	23.89287004	28.774093	56.10422009	277.3294151	0.970764427	0.51284846613756	0.571488344338739	2187.916858	10.31663905	2.93795909	13.02421414	0.987377296	0.520819681385549	0.528951510778158	0.581281772475143	0.983174751	0.98469486554966	0.984481845549081	0.98315201232837	0.931057121
EUR2	13	93.57	71.87	72.05	72.69	87.06	2761.275231	25.14955119	29.21190673	57.60888593	273.6107068	0.970958781	0.510300672741475	0.57176751809917	1902.142899	11.3615143	3.996330254	11.28034542	0.987313322	0.519519580006797	0.529639961044588	0.581625286390034	0.983435309	0.982254937792332	0.982940793450722	0.983051341608533	0.899097475
EUR2	14	94.79	69.99	67.43	71.84	88.65	2809.639777	25.64308055	30.84710782	59.51499909	279.9797448	0.970731102	0.509939131658714	0.571420636300678	1801.945054	9.976393415	4.047316135	10.16200519	0.987492176	0.519546514716546	0.528877735933331	0.581860586172325	0.983026627	0.981508136835306	0.981963295489908	0.982057643841586	0.887335269
EUR2	15	92.28	70.32	68.07	72.12	87.24	2809.173094	24.90092255	29.73080507	57.15363568	275.1985155	0.970634282	0.51072341605473	0.571732906156614	1907.520479	10.37115056	2.896427045	10.19423668	0.987425004	0.519620015743926	0.52912098226943	0.581786629296034	0.982995446	0.982878643201495	0.982619278637085	0.98271922620225	0.908500531
EUR2	16	93.01	73.48	68.41	73.05	87.33	2794.860912	25.171791	30.60948632	59.52759583	282.7385461	0.970800705	0.511148784875265	0.571335711970651	1879.760019	9.276888548	2.616481301	9.472691995	0.98746615	0.520088101595762	0.528989856672844	0.581896964845014	0.983123021	0.982811918417152	0.981935147818256	0.981850304242134	0.892652478
EUR2	17	93.85	70.21	67.51	70.95	88.22	2798.924075	25.63326439	31.23485426	60.40195874	280.2926395	0.970630695	0.510966674376705	0.570746213993982	2010.146094	6.424410441	1.005116213	4.988617811	0.987307552	0.519969101325265	0.529704889740663	0.5816827786805	0.983108752	0.982686611712858	0.981874336200273	0.9811984038597	0.877021042
EUR2	18	95.62	69.41	67.11	70.1	87.13	2847.335196	24.86838486	30.07407214	57.93404755	283.3322768	0.970681303	0.512094560407782	0.571682478131072	1813.512578	10.17603668	3.341539201	9.818949379	0.987464516	0.520780701654644	0.52926939721437	0.581883358435779	0.983003731	0.983320923338243	0.982988794655664	0.982469200816933	0.904674143
EUR2	19	93.16	73.48	67.38	72.04	88.29	2833.666014	25.25118684	30.69710431	60.22309055	290.0400872	0.970496705	0.51258924492152	0.57040910926997	1841.242668	7.919877452	2.138517335	11.41980672	0.987444816	0.521386871976912	0.528926403597965	0.581700027576648	0.982836397	0.983126489123068	0.981791217990496	0.980589792381967	0.915245118
EUR2	20	93.13	69.02	65.36	70.44	87.69	2808.48048	26.4361655	31.85920591	60.22962092	275.6218757	0.971042169	0.511551346634246	0.5713769781468	1908.793587	6.547331751	1.415280469	6.500008444	0.987860155	0.521219170431608	0.528918086525722	0.582048064159475	0.982975338	0.981451519157753	0.980372744318069	0.981666314743122	0.871873649
EUR2	21	92.63	70.35	67.05	71.36	87.86	2760.341639	25.38130335	30.36108617	57.40483668	273.4291629	0.971015715	0.512002939621864	0.571934039903909	1840.330253	9.701347987	2.495923113	10.50577797	0.987615037	0.520981054080071	0.529081471339179	0.581723351753317	0.983192518	0.982766907955876	0.982950652484749	0.983171877457036	0.907403728
EUR2	22	94.22	70.86	66.67	70.77	88.4	2818.270915	26.48131605	32.90898697	61.28892852	281.3566145	0.970750385	0.511897033170887	0.571090140440047	1774.19907	9.911738827	2.848467904	5.288849243	0.987586508	0.522335186616541	0.527475676018888	0.582267668842995	0.982952255	0.980016369348448	0.977402514537355	0.98080345346126	0.897056495
EUR2	23	93.89	70.39	68.32	70.29	88.65	2767.057692	26.5544023	31.1520633	58.11313562	282.6840279	0.970171932	0.507404791236877	0.571561708269231	1973.394803	8.938548446	12.58642619	11.99664995	0.987405342	0.520011444786405	0.529367110092134	0.582118803503824	0.982546773	0.975756969051505	0.979934577565682	0.981864363131634	0.710254626
EUR2	24	94.27	73.93	69.3	71.87	88.1	2738.106965	25.17902345	30.64503025	56.86191373	273.1724885	0.970545253	0.511777969894825	0.5718293105078	1954.675208	9.24211485	3.865988235	10.05996882	0.987328786	0.521266955523877	0.528656971264889	0.581888045951074	0.983001071	0.981796303163865	0.982255339006626	0.982713624187221	0.894290744
EUR3	1	99.44	75.64	77.66	85.73	96.39	2938.958705	25.23707385	30.17370162	66.08098734	300.8582267	0.965977699	0.50275353422227	0.568828996458799	1914.136557	4.919089177	0.922615281	6.697223674	0.983089419	0.514497223354305	0.526501662790373	0.582001416876808	0.982593933	0.977174436325486	0.983132066970284	0.977367030326669	0.917194528
EUR3	2	96.15	70.61	68.72	71.23	90.42	2888.751496	24.83207225	29.03939918	63.53657325	299.6634937	0.966155508	0.497870960324292	0.569275982192036	2003.148803	3.843295187	0.683173363	8.581376919	0.982741424	0.508994273233525	0.526666414034609	0.581614426658041	0.983122808	0.97814648711356	0.984100504695864	0.978785869296774	0.941067533
EUR3	3	96.64	69.77	70.63	73.34	90.93	2917.806685	24.52082268	29.50283364	64.30207784	295.2932633	0.966532544	0.498748035147427	0.569617851837614	1895.849042	1.675408396	0.690477212	5.328537135	0.98330523	0.51214553375817	0.526526570244825	0.581347624124894	0.982942543	0.9738404462645	0.984826609500034	0.979823135417578	0.94581264
EUR3	4	97.98	67.88	67.69	73.67	91.68	2869.515838	24.0696951	28.63053139	61.43089562	289.2838473	0.966788892	0.499832967580987	0.569443146698936	1932.83613	3.805928086	1.017033188	10.22858192	0.983245594	0.51181277588812	0.52649540404058	0.581577894265369	0.983262877	0.976593377751571	0.983640803543209	0.979134785406929	0.936403786
EUR3	5	96.52	68.34	70.24	72.77	91.23	2957.452361	28.22967244	33.44017732	69.78449119	301.6304293	0.966741666	0.500930291584119	0.567664715357431	1896.248334	3.505115341	2.284045022	9.048810658	0.983649434	0.51422615913929	0.526636995727639	0.581592640552885	0.982811185	0.974143930022102	0.979971754988755	0.976052095187771	0.925227474
EUR3	6	94.99	69.8	67.87	71.64	89.46	2855.842715	28.38966093	32.07094571	63.66983874	289.1702798	0.967067261	0.488030074201686	0.569551400642323	1984.343306	3.575363411	3.704439069	5.52910731	0.983157433	0.50324672066614	0.527715699988413	0.581796623466562	0.983634186	0.969763048938875	0.982269292198014	0.978952743398066	0.91338507
EUR3	7	96.23	70.82	70.64	72.69	91.81	2834.315595	26.49977123	31.26367078	63.40736629	292.6486746	0.966974976	0.493124276939463	0.569991817993141	2013.068689	4.271408665	4.528642598	9.191822024	0.982926373	0.507604055754804	0.527244541341149	0.581721565221907	0.983771524	0.971474264929169	0.982993945264852	0.979836148545925	0.924328042
EUR3	8	95.63	72.09	69.1	72.31	90.24	2801.817005	24.51424704	28.67622218	62.70017211	294.7874007	0.966539148	0.496853157075143	0.570639970904724	2143.002861	2.684364166	1.454085717	9.142161371	0.982822954	0.511399785443927	0.526909754718074	0.581963111388843	0.983431598	0.971555270880382	0.985262655988649	0.980543198937306	0.942608446
EUR3	9	97.01	71.4	69.49	72.32	90.88	2888.314887	26.21248468	30.90186709	65.03733758	301.2013294	0.966987215	0.500144633111847	0.569285658212097	1897.444185	1.814585755	2.960915178	7.971906684	0.983510112	0.51305968034721	0.526890064104495	0.581675871384756	0.983200075	0.974827397805608	0.982925133503809	0.978699110996021	0.926544825
EUR3	10	96.99	70.4	69.85	72.99	91.42	2901.501587	29.14049128	33.67858329	67.59081114	299.4350278	0.966946648	0.491941633158153	0.569646335171204	1883.706109	3.770578269	3.815056656	6.125904813	0.983289042	0.506072850513651	0.527029778353987	0.582049810521894	0.983379868	0.972076713182392	0.980570534381305	0.978690010500014	0.902033538
EUR3	11	96.14	70.27	67.92	72.67	91.07	2812.000306	24.14901901	28.67555507	61.30747712	292.7180623	0.966340559	0.491110440019865	0.570337398037195	1963.060491	3.648480296	2.716808245	10.98298671	0.982475462	0.504253150568542	0.526705039536125	0.581491148119052	0.983577297	0.973936284713623	0.985904266315628	0.980818710451678	0.951294628
EUR3	12	97.32	69.11	68.71	74.41	91.52	2831.746088	25.97590796	29.9687894	62.64777512	292.2752699	0.966555748	0.498232040162777	0.569294238964545	2060.759563	4.14507808	2.386640528	8.579188017	0.982845981	0.510899172334306	0.526697244165451	0.581732940273948	0.983425447	0.975206199466613	0.981993390104672	0.978617849449018	0.883992384
EUR3	13	96.22	67.67	69.03	73.55	91.1	2823.230712	22.962467	27.33762328	59.86557887	288.4272734	0.965916395	0.496204576356217	0.57103091513496	2049.719769	3.330951475	1.449442449	11.26626221	0.982382882	0.508713445417027	0.526446783810848	0.581697450418443	0.983238219	0.975410775607561	0.986932607477528	0.981663087442089	0.959211664
EUR3	14	96.39	69.36	68.96	71.79	90.7	2893.062696	24.87182811	29.82503757	65.0318539	297.1287665	0.965576658	0.485624901395176	0.569508547411225	2015.872935	2.222850637	0.647198427	8.900273106	0.982333077	0.500981920784412	0.526540399090809	0.581654911504776	0.982942223	0.969346160505769	0.984871645815782	0.9791175766708	0.94501122
EUR3	15	95.71	71.05	70.09	74.13	89.98	2892.866008	24.81433801	29.94293247	65.30113266	298.9154469	0.96590981	0.492479816339545	0.569437735546788	1943.628539	3.52616632	1.236898594	8.414665021	0.982676514	0.508140979128927	0.526504359471858	0.581786832198923	0.982937717	0.969179492635628	0.983935675231644	0.97877384641818	0.939452427
EUR3	16	98.76	70.77	70.78	73.15	93.3	2860.405874	24.74033827	29.90856321	65.21474642	297.375544	0.966180074	0.497580533696856	0.568718609525037	2027.480764	2.942948228	0.640322026	8.430549806	0.982911539	0.51059967981426	0.52677359303867	0.581441756243709	0.982977649	0.974502243867172	0.983775552912556	0.978117934286545	0.946892998
EUR3	17	96.72	70.68	68.87	73.56	91.41	2855.463004	28.52687864	32.98550226	68.41441375	294.3210683	0.96616445	0.484483105118563	0.568571206208093	1947.196041	4.762075181	1.696816492	3.948867121	0.982966244	0.502524415820157	0.527181074770041	0.581587027312806	0.982907049	0.964098638526549	0.980268437209762	0.97762016603972	0.861760355
EUR3	18	99.27	69.43	68.94	77.34	96.21	2916.477782	31.54522061	34.8131635	69.02529497	299.1968281	0.965842572	0.484201161161134	0.568722777869636	1830.884746	3.606716477	3.043574886	5.042238847	0.982882966	0.501505653527486	0.528055578135717	0.581785352417016	0.982662846	0.965494920656155	0.978983076277363	0.977547433098631	0.877230242
EUR3	19	97.22	72.69	70.4	71.95	90.49	2879.54379	23.48058442	28.26422056	62.18116945	302.4604451	0.965732565	0.483139098844368	0.570246379789859	1943.102533	2.972095337	1.350443632	9.51134976	0.982148275	0.497782424904243	0.526895749865091	0.581690255260169	0.983285915	0.970582878528322	0.985564880103954	0.980326513351695	0.955891376
EUR3	20	96.85	75.28	71.13	71.76	90.79	2862.99633	26.72942722	30.34968443	61.56935238	293.9692079	0.96470403	0.48206576025017	0.570773613296493	2084.465493	6.31623861	6.042693996	11.88934013	0.981659827	0.499054090586246	0.527478942099557	0.582359565004606	0.98272742	0.965958939809271	0.983089847782172	0.980105157699228	0.926742139
EUR3	21	95.37	70.16	68.75	70.22	89.69	2965.002365	27.62234352	32.65239503	70.35267656	299.4137926	0.964493976	0.474165846523387	0.568579772834548	2027.37309	2.329352514	0.54316819	3.844933097	0.982560332	0.493765852491946	0.527177200843772	0.581747966900985	0.981612981	0.9603050598383	0.981521621978891	0.977364434745539	0.886701635
EUR3	22	95.81	74.65	69.29	72.23	89.87	2816.689857	24.42984926	29.01290028	62.08745035	284.8676897	0.966910325	0.502741612767868	0.570151909885967	2007.110702	2.475655268	1.709089043	6.81676786	0.98275494	0.513328649436799	0.52670037681118	0.58206814469546	0.98387735	0.979375714407239	0.984598509249502	0.979527766777672	0.944277155
EUR3	23	97.89	69.36	69.15	71.36	91.21	2823.964165	24.68573689	28.42510725	61.39139329	291.1739254	0.966198395	0.497790912292748	0.570813232478891	1977.01264	2.916423631	1.151015735	7.312422937	0.982653439	0.511691421772649	0.527199570090296	0.581846967657816	0.983254479	0.972834194812676	0.985849260931526	0.98103670588275	0.939057645
EUR3	24	96.72	67.56	68.47	72.35	91.23	2805.175449	24.13065272	27.67018454	60.93337069	292.4000945	0.966563766	0.500721585487192	0.570738469933082	1881.39323	3.354556727	1.37636532	12.69873798	0.982775129	0.512606020729674	0.526834461949227	0.581713531167151	0.983504505	0.976815654202491	0.986512757412379	0.981133219968171	0.949915926
EUR7	1	90.39	78.08	71.21	70.83	85.17	2915.710403	25.25638426	28.55022489	62.36092802	315.4562509	0.966580441	0.494585007815253	0.572602470218895	1903.930147	10.71306874	14.37457265	10.73556819	0.988274013	0.50559322736244	0.529791001750362	0.585420989369087	0.978049031	0.978227122217174	0.981727409793525	0.978103758862478	0.583778732
EUR7	2	90.13	76.96	70.56	68.22	84.07	2941.156103	24.34394117	29.33539639	64.48236475	321.823055	0.966210474	0.497543071794192	0.571998127622597	1878.556836	13.18726757	10.02088104	8.234089654	0.988567499	0.507914372959727	0.529909669229962	0.584574987022803	0.977384423	0.979580610989408	0.982051620557516	0.978485464346912	0.684892437
EUR7	3	91.55	79.06	70.01	68.83	85.6	3023.878859	25.30979378	30.58619489	70.21358871	339.8392736	0.965412723	0.495904629914105	0.568734087897033	1806.997887	12.12142604	6.393768516	15.07307192	0.988712604	0.506996778917752	0.530973203493086	0.584324177902915	0.976434121	0.978121855078991	0.979695258872173	0.973319450751065	0.670924725
EUR7	4	91.36	75.62	69.15	68.87	87.84	2907.412786	26.0957359	30.69002059	66.70538062	318.2574626	0.966888984	0.49604807869132	0.571412994490287	1857.640647	12.88013496	6.877124276	11.3277654	0.988434311	0.50770044910306	0.530797710711077	0.584457105290521	0.978202572	0.977048729359357	0.981081589943124	0.97768166272228	0.562726464
EUR7	5	92.04	77.27	71.66	70.57	85.33	2954.434806	25.67408283	28.89305225	60.37112343	312.7374841	0.965402247	0.501327940005726	0.573342051022469	1930.823773	10.75522626	9.202760468	6.671999427	0.987303093	0.511453478132097	0.529876171163484	0.583926804302069	0.977817505	0.980202425911051	0.984535682730589	0.981873150535963	0.628343757
EUR7	6	91.26	74.6	70.54	71.71	85.68	2928.825428	24.79468176	28.97886643	63.09045389	312.7043401	0.965194434	0.500898464387956	0.571172426804856	1792.116249	9.405945402	8.405091039	9.489686339	0.987599271	0.510948442859444	0.530749039590997	0.583673027063585	0.977313838	0.980330738625517	0.983185542377276	0.978582871438108	0.723546481
EUR7	7	91.41	75.32	70.63	70.27	85.56	2976.895513	29.51488671	39.9537247	72.60164519	314.6344015	0.965443928	0.496964628877121	0.567468804513919	1786.396073	15.54836669	6.340055681	10.64815615	0.988777849	0.512579887282446	0.52736770917903	0.585211975927539	0.97640125	0.969535951775025	0.961920182952826	0.969680778686221	0.566631217
EUR7	8	92.91	75.65	69.55	69.14	87.19	2996.041634	24.82327627	30.66275067	66.91113043	323.5166098	0.966061596	0.495139733011247	0.568568384634337	1724.029421	10.84026735	9.47717035	9.33010688	0.989178652	0.507768574094411	0.531169672063234	0.583967130513774	0.976630049	0.975128746189763	0.97785883692613	0.97363080030568	0.675038857
EUR7	9	91.79	72.45	67.93	70.69	87.73	2912.80893	25.41561142	30.35741296	64.68512858	314.2185329	0.96643856	0.499660790918607	0.569301141239859	1994.100041	10.56775112	9.552747975	14.21042971	0.988981826	0.510981035074296	0.531638656593507	0.583548229673131	0.977205581	0.977846058114382	0.979833771484587	0.975585414008964	0.749202186
EUR7	10	90.84	77.13	67.77	67.51	84.27	2958.301703	26.53253261	30.7949774	64.50582456	308.4217207	0.966273674	0.498718850590517	0.569336725702248	1812.651084	10.41965188	9.825501522	11.28517114	0.989202154	0.510345159798346	0.531652618463306	0.583552376190268	0.976821239	0.977218733273725	0.979918174372217	0.975639460881254	0.7096831
EUR7	11	93.98	84.27	70.11	69.67	85.88	2951.053096	25.26565801	31.07237233	68.11911227	321.0560472	0.96595197	0.500751050445844	0.567333364320999	1709.148566	9.446539212	7.058675563	13.66225798	0.989218706	0.511589568637771	0.53209252761208	0.582840952712995	0.976479685	0.978814035984378	0.979147184887439	0.973393104379828	0.800123039
EUR7	12	92.86	75.77	69.43	68.86	87.43	2906.681213	24.76169652	30.56270648	66.63257464	315.4613932	0.966166357	0.498873327604321	0.568435382422035	1701.277317	9.290123697	9.763707056	13.11964472	0.989456815	0.509427037807486	0.531524624002607	0.583547971981136	0.97646137	0.97928317615691	0.979702680854026	0.974102232747388	0.750363861
EUR7	13	90.56	77.11	69.08	67.81	84.2	2935.281091	24.88607796	29.6281053	66.68835836	318.4294974	0.966235742	0.499127078608451	0.568602686010315	1794.134293	10.46870854	5.856789842	14.53427674	0.989347731	0.509290820834937	0.532051718359278	0.583184224477086	0.976639165	0.980043342996398	0.98136502515358	0.974996685687366	0.780033857
EUR7	14	90.13	82.83	68.99	68.83	84.09	2939.550448	24.56506472	29.88890288	65.54035546	319.0647931	0.96591686	0.499967494183862	0.5688529867028	1828.745532	9.148160275	8.06800237	17.75945368	0.989258445	0.51038161191752	0.530990614815131	0.583462487609063	0.976404968	0.979595429203393	0.980773344621167	0.974960685191383	0.770461976
EUR7	15	90.6	73.79	69.16	69.2	85.91	2974.229115	23.76272089	29.55568028	66.62183584	324.2328688	0.965649452	0.497975884491815	0.567788551533915	1788.481975	10.29913558	10.92416676	19.44492043	0.989378977	0.508814464700797	0.530141830800031	0.584121436008597	0.976015738	0.978698364608491	0.979356103845838	0.972038546323025	0.756298809
EUR7	16	92.7	77.94	71.86	70.92	86.64	2980.460679	23.9729482	29.77098242	69.62436138	328.1350858	0.965502381	0.498356616638857	0.566914181281201	1770.726698	9.153680255	7.830978648	19.56663411	0.989377342	0.508142107505522	0.531040413772195	0.583695716852836	0.9758687	0.980742609750053	0.980101763002514	0.971249513938329	0.781213421
EUR7	17	93.6	72.07	66.83	70.13	88.77	2990.311372	24.79977353	31.08947675	69.31156515	329.3406025	0.965465892	0.497972557203781	0.567001268892313	1688.295989	8.974076055	6.729325028	10.15568058	0.989279117	0.508556382732917	0.531143458751488	0.583757234594482	0.975928709	0.979188491407265	0.978078629382304	0.971296345965101	0.758702109
EUR7	18	91.03	73.82	69.64	70.42	85.04	3008.402805	24.89559307	31.47123778	71.54888272	334.734127	0.965591686	0.499613572418965	0.566949885406152	1773.946194	10.14529765	5.60137279	19.47494533	0.989501436	0.509922427071534	0.531279840441318	0.583290366131669	0.975836568	0.979783484496313	0.97905491809868	0.971985683847506	0.779136287
EUR7	19	92.73	74.84	69.71	70.74	87.5	2973.260702	24.62865743	30.307976	66.88469849	331.7404563	0.965493509	0.498892604828821	0.568874961940152	1743.409832	9.954177808	9.653768814	15.21451323	0.989243396	0.509851009365985	0.531189317943278	0.583989568520211	0.975991867	0.97850665324603	0.979822975378457	0.974118362048215	0.768922513
EUR7	20	89.28	73.89	70.49	68.04	84.28	2999.769009	25.12500146	31.30003779	67.15953365	326.2421965	0.965895407	0.499200450037079	0.569833341728237	1790.547643	7.149624546	8.484449555	9.378151224	0.989571908	0.510065099281932	0.530587991287235	0.584013110574135	0.976073996	0.97869948510465	0.979299967280777	0.975720118967949	0.741178993
EUR7	21	89.55	72.74	67.89	68.08	84.07	3018.559997	24.93469836	30.57463881	67.32702057	325.0850082	0.966065117	0.49795142969186	0.569707316740212	1714.381277	8.977965128	8.151462693	15.2252309	0.989641816	0.508744955070745	0.531124796991071	0.583988917963152	0.976176533	0.97878401491493	0.980448515124191	0.975544739320136	0.72425493
EUR7	22	88.99	75.32	73.1	68.34	83.63	2987.834219	24.37886252	29.82921197	65.12805691	325.348964	0.96643138	0.498899312815484	0.570483390179721	1588.014145	9.079918625	7.109304975	4.938452797	0.989736584	0.508936806210076	0.530745919330675	0.584251246211102	0.976453124	0.980277525083441	0.980885702532562	0.976435042080498	0.722683502
EUR7	23	89.19	72.42	66.16	66.14	83.82	2961.971796	24.97293845	29.01348771	62.79491034	320.6917612	0.966590829	0.498834598025484	0.570931989961458	1775.742573	8.810072646	8.481090208	10.35431756	0.989699753	0.508773936289172	0.531681797358556	0.584163646481705	0.97665057	0.980464136319201	0.982580464687782	0.977349400977041	0.755214215
EUR7	24	90.22	73.49	69.19	67.87	85.03	2968.119662	24.37833131	29.22882095	62.8878562	325.3125588	0.966517106	0.500428957914508	0.572414691620761	1709.780469	9.402639876	8.2667885	10.31096703	0.989165449	0.510590348445191	0.5304022002574	0.584070507776156	0.977103585	0.980098741463434	0.983572195897602	0.980043820052182	0.736540394
EUR8	1	96.46	70.05	65.67	71.27	89.98	2952.02758	27.3142291	30.64869565	62.4507472	294.4666197	0.964043641	0.509257564366084	0.564497217792927	1875.959866	10.67051758	1.538455692	16.31504263	0.985522009	0.519552850979322	0.533281263091223	0.578024941370758	0.9782061	0.980184332366125	0.979846414676996	0.976596643830367	0.919212429
EUR8	2	92.29	74.83	67.34	71.22	87.12	3019.842528	27.47025871	32.54427117	65.58474251	302.9508156	0.964026503	0.504750534377267	0.563582980469291	1904.77856	10.295503	1.239272671	15.76276745	0.985754279	0.516976660735136	0.533338404277056	0.578114962857173	0.977958222	0.976350718927071	0.977834721465358	0.974863161617437	0.899744939
EUR8	3	93.42	77.87	67.28	73.16	88.82	2982.668086	26.94619649	31.85183066	65.14592452	304.270615	0.963973472	0.502547143525199	0.564112883544674	1800.383918	13.55855269	3.491767662	18.60811462	0.985133464	0.514525562302645	0.53327800406562	0.57829727904587	0.978520686	0.976719487514207	0.977895686689628	0.975472138612517	0.893820313
EUR8	4	95.33	73.58	70.5	76.39	90.65	2934.718134	27.78551442	31.34361942	62.91252879	294.9499899	0.96428794	0.506130723135742	0.564510123742108	1925.289375	13.70712195	3.613029323	20.96446905	0.985517388	0.518216187653318	0.533655876975763	0.578229891775908	0.978458577	0.976678720569683	0.97879605679144	0.976272814275196	0.906444721
EUR8	5	92.86	70.99	65.09	70.74	88.52	2895.367183	26.11553429	29.45788137	61.7931595	287.0736035	0.964859153	0.510827069290816	0.564377487095457	1912.308191	12.3292424	2.771500175	23.85820104	0.985786545	0.520745923510202	0.532670531283328	0.577919388977493	0.978770869	0.980952603233982	0.980823868128786	0.976567836033334	0.926111339
EUR8	6	92.53	73.1	66.86	73.32	88.17	2924.058113	26.25002622	29.44435173	60.52315123	288.9613889	0.965171079	0.508279461575207	0.565723868718319	1869.964954	12.09778928	4.672712946	18.79459197	0.985886356	0.519570363295027	0.532319576712487	0.578363150686427	0.978988169	0.978268772590848	0.980947796557619	0.978146460484028	0.912893981
EUR8	7	94.55	76.02	67.69	72.16	90.49	3019.746964	28.41259487	31.99939154	64.22648901	296.5443367	0.963535629	0.506354459541059	0.563937945314751	1951.006232	12.28965067	3.258272071	19.25497569	0.985418662	0.51907650856304	0.532781746166107	0.578003277934021	0.977793161	0.975490994463996	0.978453228262846	0.97566565250366	0.913413532
EUR8	8	93.61	72.84	70.49	77.67	89.51	2944.932758	26.83190621	32.36163704	65.30162778	296.9531646	0.962938088	0.504425258052788	0.563566179155084	2118.302193	9.630913898	1.905456341	20.08957596	0.984362729	0.518015540754039	0.532602646689671	0.577582828085407	0.978235015	0.973764720105754	0.978249390453208	0.975732227052549	0.919511078
EUR8	9	92.82	73.57	70.15	74.29	88.08	2930.034766	28.28114403	31.21308897	62.89211369	296.5649271	0.96381567	0.507772458244955	0.564216758874117	1909.981109	12.1579131	3.201769562	20.75144102	0.985124833	0.519645043732951	0.53345296419365	0.577774609217861	0.978369073	0.977152508945899	0.979462937281892	0.976534361103031	0.903655657
EUR8	10	92.85	70.29	67.63	73.76	88.29	2956.438178	27.19432378	30.72844488	62.12816766	296.334063	0.963852043	0.504281093836062	0.563997050641716	1951.463596	13.31136395	1.204046088	19.82640832	0.985166305	0.516996892291799	0.532267917952606	0.577738754540568	0.978364808	0.975404497308738	0.979429968223832	0.976214675247501	0.927983023
EUR8	11	93.16	77.3	67.04	73.1	88.51	2951.215179	27.53338534	31.35692734	61.90782344	290.5797159	0.964268739	0.506494233189171	0.564114509805302	2015.428206	13.27453614	1.671249196	18.82989318	0.985291524	0.518719117703852	0.532306530269995	0.577949430927146	0.978663386	0.976432554541665	0.978629836577437	0.9760620559836	0.924673847
EUR8	12	92.55	72.92	66.24	71.14	87.72	2909.087374	27.71661802	31.17694911	61.81908944	292.7420077	0.964295004	0.502610336054298	0.564301512697693	1948.901273	13.20834107	3.422122503	18.80815603	0.985263351	0.516642978676178	0.533126218377604	0.57793629944341	0.978718028	0.972838801259166	0.978809341722333	0.976407803491756	0.898685489
EUR8	13	92.6	74.43	67.54	72.38	87.39	2972.578442	29.15115635	33.51655908	65.80785909	296.9910143	0.964311951	0.502436118430269	0.563896960262102	1878.342803	12.23869897	2.768923028	15.32132903	0.985891485	0.517867321840671	0.532290552130838	0.578355255834103	0.978111654	0.970202399804734	0.976078843267016	0.975001012913509	0.867497257
EUR8	14	94.65	70.56	65.48	73.67	89.34	3029.338267	26.83091324	31.29705436	64.75337646	304.2909165	0.963017689	0.507703140909352	0.56354274500199	1983.970586	13.1449608	2.237039189	21.32368611	0.98524356	0.519673164586427	0.532451288315031	0.578156473249874	0.977441243	0.976966246300978	0.979157703143842	0.974723575841435	0.904739006
EUR8	15	93.11	72.22	67.43	73.83	89.01	2967.21763	25.64230628	30.30704357	62.97329443	298.1311869	0.962692722	0.496241383943949	0.564075704218692	1950.953407	13.04442301	2.002106022	23.414519	0.983979062	0.509872191122292	0.532507488844	0.577975298202329	0.97836708	0.973266227467044	0.980181863646793	0.975951231779509	0.918690302
EUR8	16	94.78	71.82	66.95	73.44	89.72	2947.330444	26.96135075	30.4793784	62.19353784	294.5422605	0.962208781	0.500122867770015	0.565895674305874	2098.821233	11.66828022	1.49174313	18.93650989	0.983364845	0.512388991418747	0.531049995274694	0.579100859117474	0.978486048	0.976060914941266	0.980737645036608	0.977197089930545	0.912819325
EUR8	17	93.72	75.87	68.51	75.71	89.26	2982.818428	26.48050375	29.91143177	60.90655366	296.4821494	0.960733526	0.48684040203852	0.567155097196824	2074.300788	12.68896859	3.431876898	14.77427155	0.982097843	0.500733789993248	0.530970799628376	0.579816254562787	0.978246244	0.97225394364755	0.982534347872825	0.978163500477388	0.88848889
EUR8	18	93.76	78.2	67.25	74.97	89.61	3056.967845	26.62734381	30.55835496	62.86022081	299.9336392	0.959956875	0.479146753281783	0.567453440745468	2100.162607	9.736716589	6.950663122	15.83638605	0.980805273	0.491320049239746	0.530919034769203	0.580350384967765	0.978743591	0.975223286782619	0.98191695334658	0.977777314263325	0.868797369
EUR8	19	96.85	76.8	67.24	73.38	91.81	3056.037682	25.21460485	29.82807921	62.5775366	301.0580045	0.954897324	0.456789533995439	0.567969234665252	1988.522671	10.84747325	2.891841619	14.61915268	0.978237323	0.471767044451833	0.530323067484837	0.580615867224022	0.97614076	0.968252317255868	0.982284826474148	0.978218589479419	0.861042946
EUR8	20	93.69	71.55	66.84	73.03	88.41	3071.67599	25.35340965	29.74381259	62.77607657	302.6493252	0.960291677	0.466751776672207	0.566739948575035	2085.093377	9.866505735	2.549860182	13.61958777	0.980712634	0.477843985874563	0.530512464721095	0.580176044954202	0.97917743	0.976786964929454	0.982953836072595	0.976841345836284	0.915019563
EUR8	21	95.45	71.79	69.34	74.62	90.6	3140.956512	25.75191368	29.75662164	62.91134134	311.9576563	0.952903375	0.445739365409633	0.56772593683828	2065.353885	8.908689394	1.682118488	11.80839504	0.976966765	0.460532557900478	0.52872002569004	0.580822030931416	0.975369285	0.967878074552892	0.984075275616017	0.977452483900902	0.881566186
EUR8	22	91.79	71.63	69.76	73.41	86.41	3070.016263	24.73286774	28.16273793	59.52877675	296.7258715	0.954170944	0.464448635522149	0.569469744120451	2226.617644	8.847271543	2.265690403	12.93678185	0.977132449	0.478651313818361	0.528209132844295	0.581138112019843	0.976501133	0.970327714797412	0.98519370494303	0.979921523544831	0.896904304
EUR8	23	95.03	74.3	69.41	72.87	89.94	3140.124586	26.53977964	30.70519503	63.65782623	304.8286264	0.955858587	0.455843590001666	0.566474302678112	1996.039623	18.17295532	3.269588688	14.73783026	0.978073381	0.469269235270786	0.531982754053324	0.579660513344412	0.977287191	0.971390314429257	0.982104366817186	0.977251839028639	0.857552091
EUR8	24	92.58	74.9	69.54	77.79	88.13	3148.944261	26.16576907	29.86775351	64.69935223	309.4301905	0.954156067	0.458257027007118	0.567179639260063	2042.944151	10.16796161	1.338955732	11.62908947	0.978845829	0.474297695060883	0.53057297507684	0.58055359091062	0.974776659	0.966180168656088	0.982989267560488	0.976963450299947	0.87595821
EUR9	1	91.68	71.92	65.35	70.6	87.54	2987.281784	26.64330968	30.4062504	62.21621122	316.3453991	0.964650661	0.503011288110828	0.569606155955191	2357.484633	11.55776637	9.147612454	10.33956693	0.988850944	0.514268526191656	0.531044513014879	0.583562606060412	0.975526865	0.978110194368315	0.981667754751139	0.976084056859915	0.79468162
EUR9	2	90.26	71.09	63.76	65.14	86.18	3111.108998	26.15112855	30.8982216	65.23709751	330.6087975	0.964132954	0.505613460338788	0.569326393361109	2076.510974	10.09575422	8.061841844	9.481037917	0.988768758	0.516119427972105	0.530124546306029	0.583607506740544	0.975084362	0.979644308925559	0.98121411122029	0.97552959272372	0.838631574
EUR9	3	88.64	73.21	65.77	65.99	82.82	3088.28208	26.28600881	32.10018058	70.17823205	334.8665281	0.964852754	0.503932400828945	0.567737291428816	1801.704818	9.741217625	4.001376682	11.32110638	0.989045627	0.515133649968824	0.530882915047673	0.583562149508523	0.975539175	0.978255644645701	0.979399358727204	0.972882308948525	0.802586938
EUR9	4	90.28	70.53	67.7	67.77	86.69	3113.401303	25.49209477	30.3162904	67.56859999	337.0507245	0.964284787	0.505393916686685	0.568332187006349	1906.824114	7.877165598	6.225926921	11.05999815	0.988987282	0.515748514293383	0.530554831518568	0.583330590830042	0.975022435	0.979923165419323	0.98101034734639	0.974288329706228	0.829369082
EUR9	5	90.29	72.78	65.65	66.15	84.5	3125.254255	25.00701065	29.18805707	68.60314529	344.4694944	0.963466013	0.507965914532444	0.566210204282973	2090.401842	11.41775826	5.752422751	25.48953889	0.988723995	0.517015698491466	0.530521003430811	0.582991356791729	0.974453961	0.982496113782566	0.981611358622671	0.971215435163387	0.892994592
EUR9	6	88.51	69.08	66.02	64.78	81.74	3108.457036	25.79378908	31.71309663	68.03910646	334.7015297	0.964437551	0.503749976802914	0.567844611782587	1989.561007	9.43755174	13.03193672	13.87911481	0.989082837	0.515635275775237	0.530112228922697	0.583468339363747	0.975082688	0.976950182559844	0.977123311783571	0.97322266432109	0.782125658
EUR9	7	90.32	76.98	70.46	66.57	84.78	3049.877154	25.17689465	29.75197634	65.81412565	334.3444245	0.964471567	0.506275625296525	0.569130525535885	2311.324449	10.98359078	6.291090632	12.80648248	0.988775993	0.516044609359717	0.530310506558596	0.583456092805831	0.975419685	0.981069496927188	0.981733344667294	0.975447051720629	0.854464048
EUR9	8	91.02	77.01	66.35	71.64	86.47	3159.225312	28.45953929	31.44491628	69.68350374	348.9688647	0.964420198	0.500819803933034	0.567066069389993	1882.875338	14.63612121	6.240496454	16.87300977	0.98877803	0.512366525671869	0.530696752135895	0.583514020234801	0.975365722	0.977463942001884	0.979683504124737	0.971812243965981	0.80420098
EUR9	9	91.46	71.81	69.84	70.18	84.99	3195.325895	24.93231672	30.98757436	70.17592403	347.2731398	0.964949907	0.487605064748505	0.566330432637375	1876.485998	10.42636604	2.503160377	11.71835793	0.986724505	0.495278264947619	0.530146667607466	0.583204646215398	0.977932445	0.984507294702452	0.979891076488117	0.97106639378214	0.862667774
EUR9	10	91.11	73.59	65.41	68.75	84.54	3173.088772	24.9363633	31.12772983	67.96021695	342.8484285	0.964779948	0.503401117164785	0.568638143492627	1749.921586	8.068468242	4.355338716	8.86426254	0.98841568	0.511365571373901	0.529222226080999	0.583295638505058	0.976087255	0.984425126260031	0.982031195756758	0.974871241880023	0.891532755
EUR9	11	90.46	70.95	66.96	67.85	84.9	3186.222705	25.66310377	31.57704235	70.27336078	336.2247531	0.963834582	0.502185346996242	0.566134173779272	1888.173573	9.740479742	5.518557602	20.04768976	0.989182815	0.515883698360868	0.530913904622001	0.582979111355681	0.974374572	0.973446822591701	0.976310127459872	0.971105418276073	0.752864035
EUR9	12	87.62	70.16	64.18	65.53	81.55	3134.666117	25.9166276	30.06940098	66.56750827	333.3636079	0.964479692	0.505539051094305	0.569521442116732	1723.271296	13.66986352	5.501803768	11.88034589	0.989289067	0.515974345844594	0.530147809317943	0.583670821439462	0.974922017	0.979775555055539	0.981713658670083	0.975757946426318	0.816194009
EUR9	13	93.31	78.25	71.31	73.49	86.29	3106.596353	27.08328214	32.02264069	69.5326755	342.8749052	0.964838222	0.505916341142613	0.568421642694181	1810.204578	9.295212049	2.776084049	8.568359935	0.989183026	0.516302000152195	0.530023475410192	0.583479744692136	0.975388979	0.979884526872798	0.980238365894164	0.974192588286162	0.774844858
EUR9	14	89.57	72.64	67.75	66.32	82.88	3129.721917	26.29531094	32.35046122	70.30912349	341.9681414	0.963820181	0.505945832394231	0.567271247693866	1901.257401	7.64513006	3.815639065	4.975955695	0.988677989	0.515594774782672	0.530566889820301	0.583532557591949	0.974857528	0.981285802610183	0.978928907443878	0.972132986092177	0.787913979
EUR9	15	90.23	73.84	66	64.96	82.56	3164.29174	25.61732317	30.34396454	68.67239222	342.8659595	0.964386599	0.499723652785276	0.567571610505537	1790.829747	10.58500999	3.116098458	8.637447973	0.987828539	0.507896839941353	0.529962071374113	0.583142947194325	0.976269221	0.983907781042661	0.982248700103527	0.973297564921763	0.835851067
EUR9	16	90.83	71.26	66.39	68.83	84.24	3069.482196	24.90840314	29.49901778	64.44400338	328.9326023	0.964672022	0.505479892103778	0.569473180197567	1810.814969	13.15461506	5.893444286	8.405457971	0.988496851	0.514930048606706	0.529623545091696	0.583691416992048	0.975897921	0.981647688790939	0.981340670171898	0.975640832843231	0.796182783
EUR9	17	89.23	72.86	65.08	67.32	84.29	3206.206993	25.1854738	30.38726593	68.06810665	342.2085339	0.964113157	0.507711825614357	0.568553178342359	1680.311191	10.09859778	3.684023778	8.354287485	0.988958718	0.516900373528995	0.530243870793255	0.583154822226819	0.974877049	0.982223754546926	0.982234350024132	0.974960948057151	0.859879054
EUR9	18	88.88	70.65	67.8	66.68	83.13	3169.692527	25.20410766	30.87233302	66.72194394	341.0012897	0.964505891	0.507689262219654	0.569531840456864	1497.607795	9.936104149	2.906715615	9.598422414	0.989173803	0.516556023883501	0.529530733710092	0.583762296039397	0.975062106	0.982834849940988	0.981147372889494	0.975622859374301	0.850432922
EUR9	19	89.15	69.04	66.64	66.75	84.08	3093.782332	26.5656062	30.21875525	64.13238116	330.1265083	0.965513817	0.50621074783191	0.56997988998221	1967.10121	11.27597624	6.704984264	8.824189422	0.988995671	0.515577077421839	0.529925580239491	0.583243731310761	0.976256869	0.981833308732876	0.982582543039718	0.977258493119605	0.791774541
EUR9	20	88.77	70.95	67.55	70.56	82.89	3078.199056	25.4270789	29.35276383	62.96752941	327.6324705	0.96512905	0.503836628036377	0.57060977175722	2274.443307	10.19276704	6.676792041	12.56811546	0.988396998	0.513065902445774	0.530254529815476	0.583559323307258	0.976458904	0.982011522563863	0.9829343212888	0.977809365675716	0.80262016
EUR9	21	89.69	73.09	67.13	66.16	83.12	3100.580212	25.69129219	31.07467985	66.52072278	333.5068254	0.964966451	0.505217073642162	0.568767735459072	1913.9475	10.12741592	4.891474723	9.435629693	0.98917829	0.515238796060395	0.530677197372607	0.583308665704284	0.975523281	0.98054936372249	0.979732180406427	0.975071636853439	0.770468625
EUR9	22	88.32	73.76	66.82	68.46	82.93	3102.577408	26.3639053	31.15209573	66.70670578	336.2702284	0.964617457	0.505160302626022	0.568149703621098	1777.10834	11.93764038	2.307633038	3.482864838	0.988988692	0.514932760819342	0.530438338756829	0.583296237801161	0.975357418	0.981021875209938	0.980369633229018	0.974032861523055	0.77394989
EUR9	23	91.32	79.32	68.77	68.05	86.11	3102.078127	24.66042773	29.62231364	64.68085337	334.4668458	0.965014543	0.505564650443254	0.569799390157432	1858.391791	12.03937599	5.376751807	10.61428262	0.989039019	0.514394803784129	0.530548089370371	0.583756848802339	0.975709273	0.982833898639885	0.982821104163384	0.976090287122895	0.849928859
EUR9	24	90.01	77.55	74.15	68.17	84.37	3223.070889	24.62642132	31.92458732	72.74497049	344.9591543	0.964811164	0.503659546841231	0.567348486144197	1664.496514	9.279380631	2.580294125	6.812283349	0.989214785	0.514297520631275	0.531204894183994	0.583147185972357	0.975330311	0.979315525812789	0.978973356127922	0.9729078692169	0.737078612
ABO1	1	84.87	70.78	69.01	67.34	79.19	3170.9980177192	22.4550596545366	27.4010595941532	55.2494510937364	324.082798014877	0.961815180758875	0.494779178687445	0.572793785649341	2163.79100704413	5.53425837175532	8.68558148199788	7.77535313674783	0.985051747421338	0.505255440929319	0.529234185472233	0.582374567711667	0.97641081626088	0.979265414296965	0.987223647472906	0.983548762955135	0.644746254975669
ABO1	2	88.74	73.29	70.26	71.57	81.29	2972.74419920587	21.5310474752742	27.2394297097583	55.3834413739928	300.081231153984	0.963494217788571	0.49308071869308	0.574617197428236	1889.73402795572	3.72015324550518	9.8821639995894	5.70996802211152	0.985545103383038	0.503893979718152	0.528084644265664	0.583358178713148	0.977625696156601	0.978540602864276	0.986609530411361	0.985016098849949	0.624045746853293
ABO1	3	86.27	72.19	67.67	67.61	80.15	3035.04061473765	22.3112496748408	28.6391998175992	58.6688487212023	307.257098311673	0.96511837973497	0.496792339614295	0.573050405898162	1668.30410345758	3.0528585997657	8.13927013778123	3.87278157048295	0.986630728507345	0.507843683909428	0.528074524920185	0.583030467331099	0.978196149632476	0.978238689098073	0.98408428827028	0.982882435838007	0.726009825144188
ABO1	4	86.85	68.68	66.46	67.73	80.1	2979.8902746078	21.6889139296367	27.5305671219345	56.3095803266798	308.403133227828	0.969008715530988	0.504954469874827	0.574029164865872	2026.3692382631	3.22320438233351	8.98099771937326	5.55794509386004	0.987557515088115	0.512437469978111	0.528329196101709	0.583260062556811	0.981217499463338	0.98539724250921	0.985641499750125	0.984173616053062	0.773519633891446
ABO1	5	85.98	70.88	67.51	66.64	81.07	3090.94737812741	21.7639774025306	27.763525473115	56.276674864171	309.683618797854	0.967073437652371	0.499380496570405	0.57402994484885	1898.8028492086	2.55749441113542	9.26153976863612	5.91418174567367	0.987163757384982	0.509185580789153	0.527725143949842	0.583371747427022	0.979648442740816	0.980743594106589	0.98471270439506	0.983986535824928	0.715831530753011
ABO1	6	90.56	68.79	65.54	65.97	80.45	3133.23824483211	22.1159723624305	28.6045507500811	60.7694538067265	323.835927680931	0.963645428558517	0.490922397946447	0.572830756059396	1970.41976360424	3.97958273558999	6.21959637722945	17.0987234029753	0.986352059000188	0.502968896021524	0.528083487048295	0.583076741676061	0.976979182803464	0.976049218609016	0.984800472030007	0.982427723686572	0.804842977166266
ABO1	7	84.06	69.05	65.8	64.85	77.99	3144.73525571332	22.1339653381825	28.3042546784851	58.0921989585856	317.190954344681	0.960221909550219	0.486557979850763	0.573400813831733	2185.92600104807	4.3410207839928	8.45734109477238	9.69553899446983	0.985590681492579	0.500683149138903	0.528031405619807	0.583292802666324	0.974260337056007	0.971788207147708	0.985279395191092	0.983041126533068	0.778707822227923
ABO1	8	85.22	71.22	67.43	65.85	78.66	3031.73260856352	22.1648499715889	28.8973581925631	56.8448158458168	300.484169799592	0.964680468118568	0.487976253682247	0.574013579142768	1871.73336918454	3.96379678108171	7.7761684292878	8.70721661801273	0.985446605942409	0.498977632538962	0.527593120623435	0.583385518974123	0.978927181139377	0.977952160298778	0.983406106250371	0.983935254601732	0.692399475850858
ABO1	9	85.9	70.14	67.29	67.98	79.11	3002.52725844943	21.786379695382	27.9139652733273	55.6623460247776	297.063799968638	0.966007981539726	0.495953678720142	0.574431529351403	1955.6695175725	0.848518791160159	9.21295707119357	5.3909317080376	0.986906797562303	0.506720420864231	0.527471888462023	0.583492637138168	0.978823921292063	0.978752105301528	0.984840090730408	0.984470913238585	0.720878011774099
ABO1	10	84.71	70.04	67.93	65.85	78.48	3067.94897709693	21.8821976805134	27.9539702162581	55.8790901889181	306.746403274009	0.955647610541544	0.477356782374413	0.574303465899759	2033.86518162385	3.17409911744595	8.39276895947071	6.13436059105493	0.98463146971441	0.494171095534191	0.527651810529471	0.583479828664385	0.970563748910775	0.965974713390304	0.985254792739705	0.98427304199079	0.720583458146556
ABO1	11	83.64	72.09	67.42	66.35	77.97	3025.51717475238	22.0777002942639	28.3721567630083	58.0991320505146	315.524463268051	0.952555821282211	0.475502902880194	0.573200253107151	2145.37500536767	2.97612423369229	7.58989144641472	5.59904935968943	0.983721344569252	0.49392430887775	0.52784382014115	0.583335257522316	0.968318748536774	0.962703989930338	0.984202319909555	0.982625764027683	0.724503526189197
ABO1	12	85.77	68.85	67.23	68.07	80.45	3026.24209510881	21.6053490024464	27.8020812338393	55.7603925305814	302.447350060574	0.960016545105494	0.481137169369273	0.573920176854508	2184.65400742357	1.88483810435101	8.69117882017449	6.47589952238925	0.984018977078782	0.494156959688047	0.528024100877555	0.583143384380789	0.975607755000272	0.973652520593875	0.985405519954082	0.984183636866472	0.712368860868543
ABO1	13	94.71	69.13	66.66	71.57	90.51	3048.90481523102	22.0192824764853	28.2639652460449	58.7581060730448	312.811889976167	0.956446152471065	0.479416565891758	0.573302026077489	1937.87473368263	2.40793736318361	8.40029963770675	10.0522548142997	0.983460227916293	0.494336240975882	0.527839240882091	0.58328447128502	0.972531603537782	0.969818771420296	0.984522342110813	0.982885803241876	0.699969208708399
ABO1	14	88.84	69.42	66.05	71.05	82.14	3180.36870467539	22.1602023499025	28.3966419895695	59.5145543281839	332.132623271192	0.961029996732119	0.486436001352154	0.57276569005346	1966.34229111087	1.86868502978311	8.31352931387573	7.62055299914433	0.984198393222918	0.4986813023822	0.527588625240365	0.583245601996674	0.976459627804379	0.975444635739197	0.983978497294697	0.982031734303118	0.806027176772124
ABO1	15	88.6	70.37	66.98	70.33	84.61	2977.01340529148	21.9304823557951	28.4723062002166	57.8854983462809	303.123366034593	0.965788981448738	0.498197769402672	0.573695568126251	1949.04841930545	1.54501117934373	7.93136758302061	8.03116522386896	0.986613859238491	0.508640307970292	0.527573058978762	0.583279502516396	0.97889257525145	0.979469699109592	0.984455499017109	0.983568881901734	0.72803235839608
ABO1	16	86.34	71.17	66.06	66.37	80.31	3011.41555065886	21.804174825645	27.5056241294707	55.7705524975309	304.109251293941	0.963214161198551	0.483050048271278	0.573788222553568	1892.34278931642	1.91311200646499	9.39340805368661	6.39141499779586	0.983930146557098	0.493968882949609	0.528470546050152	0.582974766682606	0.978945674719862	0.977895703443644	0.985669620403307	0.984241952389614	0.743736942809144
ABO1	17	97.76	69.02	67.52	71.21	95.28	3001.06537798196	21.9618267616233	28.6659963509277	56.206314195745	304.258851254951	0.963158574626556	0.488310012483797	0.574128175020649	1995.39247318858	1.76192292766056	9.43738690846803	6.67687105240169	0.984936679543534	0.49982146071046	0.527335969530111	0.583548833506763	0.977888827404548	0.976968879626936	0.984341390876443	0.983856263700328	0.774724539666698
ABO1	18	84.29	70.74	67.94	66.41	78.35	3027.36666155016	21.865350676609	28.0985824993468	58.2705836317078	313.679672450215	0.955665124788627	0.472680366663636	0.573479741845019	1971.15294995908	1.87733466923797	8.95160788287841	6.60673956325663	0.982123025058883	0.487517847941343	0.528016245451235	0.583407532718063	0.973060503017257	0.96956525522017	0.984423966379119	0.982983094464359	0.732482721357157
ABO1	19	83.57	70.29	67.91	67.24	77.93	3014.13608398591	21.8311304171836	28.3946456182959	57.7294609004628	311.216148815412	0.954950363728723	0.475923278430631	0.573490372647489	1912.72292774934	2.55566915091948	10.0105464777698	6.74057630364407	0.983234457851294	0.492336874047399	0.527936399976536	0.583279812907201	0.971233621953831	0.966661860035316	0.984179212222808	0.983216562543253	0.745957940387419
ABO1	20	91.92	69.72	66.53	68.21	84.5	3057.57520700123	21.6898042665142	28.0250231569664	56.1159643203599	301.665435321032	0.961669221547526	0.483686839935843	0.573681797631751	2124.24451209712	3.33692602992285	8.19287798418904	7.36266606879474	0.983518424829051	0.495063236416007	0.527900763930352	0.583395289063103	0.977784652803711	0.977020316510425	0.985040073996909	0.983350068789634	0.715058531860777
ABO1	21	96.18	68.18	66.12	69.39	91.62	3095.6043349505	21.8517184927347	28.6195046178108	58.7122655650163	310.475645589123	0.959259909149966	0.483233324628139	0.573399210333013	1974.4028554428	1.81264349589046	9.6706094304594	8.51940727050314	0.984453864329793	0.497363879988375	0.527640611964927	0.58323022456812	0.974408191086762	0.971589100196487	0.984561581438501	0.983143853283004	0.718866989015618
ABO1	22	85.03	69.9	67.05	67	79.23	3075.65637821567	22.2134848556238	27.534608164024	57.1442971367763	316.628844435623	0.960619848584964	0.488893781520533	0.573829902790925	2216.56286906897	2.5773121941721	9.3378352460831	6.73039299836499	0.984711290934614	0.501975174541682	0.528404896575005	0.583139112479552	0.975534511920968	0.97394015942503	0.98600334508047	0.984036039618329	0.753182923216027
ABO1	23	88.47	72.6	80.96	70.82	80.43	3041.92258594597	22.2290258561119	28.0476202835451	56.20756616491	302.626447365863	0.966888513232219	0.503354513608017	0.574049108239456	1959.38229679924	1.89044577755294	10.061953808277	6.0114190483894	0.9866470989257	0.512359670277144	0.527094084702602	0.58349129939437	0.979974009232891	0.982424150081414	0.984622573804538	0.983817768723005	0.742423860947257
ABO1	24	91.04	70.76	69.14	70.76	85.15	3128.63430559389	22.5008694340156	29.00364973725	61.1944207888958	318.492684181695	0.967868788091737	0.505609373542139	0.572897927994501	2099.49529309978	2.17953580785505	4.76968223856595	7.05989418669939	0.98682380845416	0.513691973969995	0.527454789342502	0.583186318714903	0.980791889899662	0.984265667292033	0.983907066127934	0.982358312617701	0.736946214397351
ABO2	1	87.5	72	69.25	68.09	81.19	3217.43791824329	22.6483909038076	29.7993155201445	56.6977926655771	309.667294042931	0.965272542872485	0.491078750959086	0.574945984517658	1720.06909170601	5.24012327816872	11.867064522471	4.10565278232338	0.988204430528358	0.502382173235918	0.522596681619551	0.585087137184181	0.976794388946817	0.977500351566966	0.981507615105528	0.982667278047969	0.666152996395418
ABO2	2	92.13	70.1	73.49	72.18	85.62	3199.39988300953	22.0297174782381	29.7915378329088	57.4152681597155	311.602251518044	0.95289800005619	0.46552501223398	0.57430579860364	1756.18707777274	6.32484544150084	14.0221289980397	5.39515094168631	0.984571941266148	0.483161192791602	0.523416117161512	0.584663893136967	0.967829734037286	0.963498350404088	0.982342981081699	0.982283676733053	0.664945062359056
ABO2	3	92.3	77.38	72.15	69.26	81.5	3202.12672608713	22.9509915916871	30.2501216291828	58.6599831701315	305.42553228746	0.957921529797677	0.479908528360901	0.574646126686803	1684.91874555767	5.4620096842174	11.8226993940639	2.82294146705717	0.986512784798846	0.495770627715688	0.522496540673405	0.584836826762907	0.97101785659372	0.968005165154955	0.982173045756709	0.982575139577803	0.621582655319431
ABO2	4	88.82	70.03	69.03	67.35	81.25	3193.51895059214	23.0200793861562	30.264966910214	59.862487041446	313.926248048472	0.943521280232517	0.461633601225421	0.573922863029725	1965.21066865382	6.52864171201739	9.76367111876414	3.01743627035752	0.983506376582502	0.484531535773608	0.523371087143405	0.584759546519724	0.959344344579721	0.952742117163483	0.981538963496788	0.981468137537053	0.527675686587198
ABO2	5	88.4	68.32	70.08	66.94	80.73	3177.11437233293	22.7914131410412	30.9374297330501	56.3787144198416	301.037295916465	0.962468688991225	0.484554378920839	0.575147217759051	1801.0072688067	6.63063423671988	13.5954654167257	3.96127112573878	0.986444965984693	0.497326974361812	0.521913770652054	0.585067800210573	0.975694257844851	0.974317509205362	0.981322392603802	0.98304370459637	0.593235155596052
ABO2	6	86.22	70.08	72.44	71.09	80.82	3177.1489812404	22.4695981334915	31.3080131880086	58.9256577416654	307.676737558279	0.960533688012427	0.48518359394051	0.574112715093172	1986.87582750583	5.61538127488833	12.6819503669591	5.0066993065898	0.986245921478368	0.499138320774255	0.522824890139962	0.584646095591178	0.973929186518309	0.972042365306476	0.98030416331259	0.981983321914849	0.637953651836125
ABO2	7	85.81	68.83	68.36	68.11	80.19	3242.16057808261	22.2059475108658	30.5060564974215	57.4233668689018	301.985016657667	0.966316905612715	0.490708006126035	0.574700184431641	1648.63692473592	4.9314566248619	12.9533221894951	4.44057829526409	0.988016242249136	0.501110803198564	0.523812971176388	0.584332699243566	0.97803746972112	0.979240525236877	0.98263269315596	0.983515358930975	0.663392992337636
ABO2	8	87.46	69.21	71.03	68.79	81.36	3169.37519910737	21.9952044727391	29.9815826599909	57.1666533520133	305.831732042552	0.966334256614291	0.495244431242964	0.574780498399466	1748.08263151164	4.07229489835371	13.8160465026401	5.2710657395964	0.988507956663572	0.506028286481629	0.523012827056992	0.584454769184903	0.977568516368727	0.978689224443076	0.981536692083001	0.98344735761344	0.633210910538386
ABO2	9	87.44	67.34	67.96	66.26	82.3	3168.35863694749	22.5306336107487	30.8929947974826	58.0667314452693	305.307890567421	0.95965734951352	0.48243835439608	0.575125420343657	1912.11688896876	5.34877666730388	10.6871154212364	3.54387354448822	0.98597303111035	0.496740737178926	0.523558225853918	0.584540070308599	0.973309937730047	0.971207550111409	0.981931987820033	0.983893918581198	0.617988774157412
ABO2	10	86.86	71.69	73.49	69.77	79.93	3265.72292334783	22.7582786973081	31.0629103765867	59.4512159872155	314.908219452476	0.961768095985408	0.4831569595024	0.573841968973094	2212.37093846113	4.60095592726021	10.1067806477506	4.33775521910561	0.985840649789658	0.495749970992989	0.523141156485887	0.584353652619727	0.975581698919206	0.974598059047053	0.980565953810746	0.982011435028245	0.684154855690777
ABO2	11	86.55	69.5	71.09	69.62	80.12	3155.49522823481	23.4311845335169	34.819800022616	60.7466576297702	300.28975395513	0.95987205504297	0.487588418234525	0.572837600346447	1776.70043472741	8.39357996138019	14.8390661655397	10.7714048946143	0.98622938816294	0.502462850977906	0.520938667633837	0.584479740776479	0.973274642353676	0.970396950312979	0.974732888181199	0.980081190813277	0.43939009218707
ABO2	12	87.13	72.14	73.33	70.7	80.94	3144.78220503938	23.4758840282949	33.6201872735497	61.6988404889772	304.257754215637	0.967259128800015	0.500496642067564	0.572601786708749	1886.00984414452	5.15950582493193	14.6784309634586	7.94514687543987	0.988256715667932	0.51159427850912	0.52076087308055	0.584366756911794	0.978752902424017	0.978307739340056	0.975566369752146	0.979867146678194	0.478060546038495
ABO2	13	87.97	70.68	71.42	70.11	82.32	3195.23107340506	22.0508494884636	32.3741994329607	58.9463157347824	305.592203737267	0.969214601872971	0.503275919477845	0.573808563225375	1762.42815332531	4.76694556860769	13.6549585828819	8.06098590251145	0.989218577019874	0.512648664645185	0.520641696417358	0.584477754027063	0.979778002949391	0.981717020225095	0.977174610502522	0.981745770941363	0.534854827885344
ABO2	14	88.8	70.41	72.17	67.73	80.19	3089.81980457801	22.7813529802236	32.5168477758632	58.3725020498493	298.895511092498	0.961910902278185	0.484780660121212	0.574157783303676	1831.53346587965	5.37757010065673	13.7454898714859	7.56744128454621	0.985536425097114	0.497613859318051	0.521127039234556	0.58482739557629	0.976027752787928	0.974210526984868	0.977048045055636	0.981755963634193	0.507860285273246
ABO2	15	86.27	71.82	72.77	69.1	80.39	3147.68005309274	22.1550556162426	31.490195912617	59.3637283457325	302.88517424203	0.961237535300083	0.494271748582058	0.573804641833949	1674.56579007422	5.41921789429298	11.822303148976	7.34996529244563	0.988133076921646	0.508372931492287	0.519891861488264	0.584874056506181	0.972781458034629	0.972262128770634	0.97772346955764	0.981073849063582	0.491061169937427
ABO2	16	87.46	69.24	69.2	69.9	81.64	3183.13016795253	22.1687669701393	30.8305712008495	57.8821786618782	303.290307356563	0.945276677121607	0.463317419386174	0.574239419766083	1880.22969702428	5.85492349730077	11.9772063203278	4.92162595979669	0.98170037866456	0.483224891624352	0.520780996572583	0.584788419038507	0.962897333713468	0.958802883329831	0.978667554478457	0.981960998321806	0.550261593705248
ABO2	17	85.27	71.12	76.1	69.74	79.46	3299.07424099736	23.508279120059	31.630093257202	60.7609028386397	319.053390783877	0.96555804246706	0.492363109938392	0.573785601095232	1894.73212477269	14.7738275135681	18.4220416143276	8.97600684236692	0.987310870164734	0.504890745405274	0.521555588248585	0.584916465604447	0.977967600322233	0.975187432962697	0.976714790674675	0.980970163837476	0.096370968048915
ABO2	18	90.51	70.83	70.73	68.6	85.94	3117.26114995061	23.6960128881526	35.8664581038803	61.5380286337536	298.337244040024	0.967458685898649	0.497507612272672	0.572075379452175	1854.35789335856	8.36302735070636	15.1729129379339	12.661993714661	0.98774499963534	0.509702837107705	0.518082843688189	0.584511877411507	0.979461992979788	0.976073853337299	0.970979356340016	0.978723275882079	0.191281973845913
ABO2	19	85.83	70.1	74.24	69.75	80.24	3136.81182146456	23.2235760149434	35.6496403612735	63.827568189615	295.347927635728	0.965677232884482	0.496576903219049	0.570442309378153	1789.59905774894	7.09491647115517	11.335098579799	16.3820233683311	0.986849632968624	0.508664238928315	0.516258849429507	0.583903316913617	0.978545464904869	0.976237103408858	0.969776478330975	0.976946512983321	0.287234761143227
ABO2	20	86.05	70.96	76.96	70.74	79.58	3161.56522672685	23.909629990788	36.9572125759981	65.8741973533991	299.114460403517	0.96281586188646	0.494391426991249	0.568318135225597	1796.40678351722	8.38055315529324	14.4633237883627	19.1688003289103	0.985965032329651	0.508396619923127	0.514460228309342	0.583413181197322	0.976521306857614	0.972452230437732	0.965771078847946	0.974126319976614	0.153724099654832
ABO2	21	87.73	74.02	77.36	69.53	81.27	3184.20029346599	23.2924093545228	35.7715434566741	66.6158376696725	307.599513623842	0.964440438288118	0.496463863657942	0.567520364290734	1842.29106725241	9.57507500007405	11.6438942789225	14.309146994566	0.986559078186532	0.509330151884774	0.514164315695894	0.583239655233979	0.977580014833909	0.974738805116444	0.966410489541187	0.973048315898653	0.164917013433389
ABO2	22	85.63	71.78	73.73	70.99	79.4	3123.65277806253	22.8913813444925	35.1501961282141	65.649023707476	305.500115611288	0.958725624164106	0.489901096309849	0.569072410130477	1838.55651022126	8.01475225611175	14.2283719909084	18.0509464135858	0.984128084345357	0.504366169202164	0.514977922451332	0.58369524363323	0.974187851576099	0.971320295103858	0.967841047487757	0.974947828233562	0.196337896445131
ABO2	23	87.96	74.02	77.42	71.54	80.38	3182.7816207011	24.5448954451059	40.0940195136403	73.05232030411	301.374891754503	0.96431779565568	0.49409353230057	0.56417027389269	1853.97807325711	9.42476927603013	14.9004346387869	25.6574462329013	0.986094676275735	0.508974470949758	0.512189007322192	0.582303991120862	0.977916034693239	0.970762897751198	0.959681646349747	0.968858676044334	-0.0791510074451029
ABO2	24	85.48	71.79	74.64	70.4	79.96	3161.05514740379	23.7359683519575	38.8153778137169	71.1332320707502	302.55246273484	0.960687100265661	0.493242332725029	0.565849264903245	1927.53093886961	9.56765409886868	14.6127098134242	25.8964072680481	0.985514062535768	0.508553934805638	0.512551771103359	0.582845128699285	0.974808109580673	0.969891881602565	0.962206923554881	0.970839828696915	0.0997343793094925
ABO3	1	86.93	71.18	68.44	66.86	81.85	2985.28113335046	21.7614477996236	31.1082569294799	57.8278616306825	313.95400655584	0.967471493488878	0.503331615633837	0.57361043008688	1928.97138597885	3.35962907451059	14.6338963395946	7.28285212833307	0.988074062581353	0.512546888699897	0.526139965806093	0.584178615324684	0.979148760328096	0.982020624319006	0.979296244484353	0.981909325400537	0.638997854454062
ABO3	2	88.22	73.65	74.89	67.48	79.74	3086.15728707586	22.866885825	32.6191990082613	59.6971587954436	317.493455419639	0.955591676899056	0.489885277101856	0.573822015681667	1639.45301785788	2.23082475690276	14.3596128321454	4.74016322232865	0.986663152974216	0.507034711076303	0.525187285351439	0.584438070910881	0.968508526966373	0.966177002087208	0.979036490764355	0.981835448856596	0.609634202499227
ABO3	3	86.57	72.89	69.93	67.49	80.94	3024.92949657352	22.4803624947764	31.9942036391703	57.6574865494972	313.211190895399	0.968462531811473	0.5050028761154	0.573865688176531	2023.78318976058	3.26013176931635	16.0353278802287	7.26504675436158	0.98873991505587	0.514105768895533	0.525295606092576	0.584396358164482	0.979491691459376	0.982293735392838	0.978294931037502	0.981980260758252	0.576764894364293
ABO3	4	87.72	71.72	72.34	66.83	78.96	3015.8018155503	22.7768788310156	31.7217682768564	58.0100237449707	311.816054889533	0.968859296485324	0.505210599567399	0.573557267241877	1888.94288733049	2.56575027817002	16.3990973945804	7.13432734270898	0.989009534575283	0.514111969847654	0.525593467710068	0.584306115695443	0.979625840413549	0.982685930687642	0.978304459633394	0.981604080181889	0.536854795382283
ABO3	5	84.51	71.2	68.52	66.45	79.06	3060.43903035518	22.4137574721428	31.879170293625	57.5599708999367	319.897724853025	0.967660313614361	0.504838735834356	0.573985996750383	2034.78485114469	4.16872939269659	16.6910026524797	7.11660635416509	0.98835311161994	0.513522345475692	0.525581228856681	0.584295230621164	0.979063355229728	0.983090103638446	0.979615212826411	0.982356121819066	0.634052372927907
ABO3	6	84.64	72.12	71.44	66.22	77.79	3096.48131971843	22.5177761083446	32.8960507116611	59.5485737013587	318.305971908259	0.965092220802668	0.500132312346507	0.573498745218257	2068.14953778246	4.50129244245788	18.0842955388266	8.52728432940338	0.987377252389099	0.510758582672255	0.525342713649749	0.584255781997839	0.977430073933232	0.979195121362127	0.977739995970275	0.981588480403568	0.643988738549232
ABO3	7	85.98	75.07	78.45	67.55	78.79	3049.20343650815	23.0537660800316	33.3788675318746	59.513093640707	314.365918949629	0.968167865559726	0.503433044145769	0.573789052379698	1976.3140345782	3.3461590918006	15.3135962827823	5.16053531134065	0.98895607159961	0.513568688854143	0.524969530219732	0.584430129120976	0.978979646683134	0.980264286105548	0.977436147742129	0.981792388497692	0.535183705728416
ABO3	8	87.95	75.74	72.18	67.56	80.42	3111.1704636085	22.1311384181056	30.7661792175938	58.5943433265798	323.370333782169	0.965982991441057	0.50404301234188	0.573229052560591	1914.0721467259	3.27036001762439	11.8982410668721	10.0194828431612	0.988591266510021	0.513918892273368	0.526426537428344	0.584026540131118	0.977130816511483	0.980783193457238	0.979409537922539	0.981511991615822	0.629778341968203
ABO3	9	85.19	73.31	74.79	70.37	78.6	3033.4297166042	22.6257283716544	30.6149730743935	57.280758167171	314.874086869368	0.966383002108406	0.502346408973747	0.574270665668222	2039.14013052213	3.51659201081243	16.6973531513512	6.90938490083365	0.987748936035595	0.512198802223351	0.525979554462035	0.584303691250417	0.978369064093409	0.980764513296718	0.980143536249257	0.982829090877854	0.57082584330568
ABO3	10	85.71	72.3	69.75	67.23	79.18	3033.55277748691	22.8365996563438	32.3815182933267	57.654173527211	312.620737959049	0.961446723496569	0.494706861906181	0.573959929692258	1917.32693335787	3.59809840660973	16.7090742572631	7.75188237524551	0.986750669767292	0.508014215555337	0.525548109658104	0.584244326708252	0.974356291770554	0.973805154970695	0.977642117841386	0.982397095622753	0.569788099943378
ABO3	11	96.7	77.96	78.46	82.4	92.72	3080.7273801085	22.5364455534379	32.7861721760896	58.2328416278836	321.834841199023	0.966311062874477	0.503116888841458	0.573874096997198	2046.96036362942	4.57014676285238	18.4160890528874	7.69053716679432	0.987488331284603	0.512618601480889	0.525522820090256	0.584257137931237	0.978554411491043	0.981464362370031	0.978756101117373	0.982228645129089	0.630894585112966
ABO3	12	85.19	72.75	73.66	68.08	80.4	3186.67798540463	22.758302050106	32.3816841588056	60.6344744151888	326.375512706774	0.967688742008603	0.504773188545781	0.572930988088514	1815.70619219519	3.14893789682717	14.7238782330387	6.17763773462213	0.988932183802037	0.513912170788297	0.525230109649345	0.584162416733381	0.978518808325399	0.982216840226808	0.977787323596184	0.980773448747915	0.635957001314308
ABO3	13	86.41	70.33	69.91	68.84	80.55	3143.31594241918	22.8309930156702	32.962977528101	60.5817436695427	325.23768019674	0.967559442596051	0.505597377081428	0.573522044448767	1926.69665398699	3.75420448170314	11.8284394820652	5.91707913729	0.988070610127803	0.514893679118112	0.525012527071496	0.58420438919144	0.979241192561027	0.981945200701227	0.976585394386382	0.981714713308714	0.589688807557059
ABO3	14	96.67	71.01	72.15	72.67	90.08	3099.14710080338	22.5890915852994	30.4553843770498	58.1846449657481	320.13928324892	0.955433979908667	0.486988227913243	0.572916670384564	1848.31752144684	3.19629136265089	13.3299745928185	8.18680921357056	0.984574772062215	0.50195593630776	0.527006388766326	0.583434496363544	0.97040266216398	0.970181230439041	0.981037276907091	0.981972567538368	0.682512339144048
ABO3	15	89.03	72.13	70.35	67.55	82.5	3048.90418359199	22.8719373722357	32.4635244122865	58.2115884155292	318.677387899923	0.967280937290564	0.505834998594094	0.573983848336524	1863.93810437103	4.55777120491717	15.5655242197301	6.28670243632223	0.987863944885404	0.51432625934433	0.524653228264845	0.584414469593959	0.979164127103324	0.98349051677614	0.978938125781749	0.982152014024086	0.594589539336639
ABO3	16	85.77	72.5	71.44	69.51	80.9	3124.30081894588	22.9756551465434	32.4372036690642	58.9303078331057	314.755190310222	0.965515270693878	0.503050514601759	0.573775488896186	1601.89590885555	3.4385614094226	12.9326384009133	4.6459358143945	0.987707509098787	0.513199088474552	0.525671770014703	0.584024885722096	0.977531568606623	0.980224879387533	0.979511709302137	0.982450410801866	0.603762791278877
ABO3	17	87.07	71.77	71.35	67.42	79.02	3098.3546276403	22.5537237686208	31.7979665548464	59.1311021596398	321.781179754045	0.968628910475997	0.50565001385188	0.573637877451977	1944.5942877504	4.30380284309346	14.9011573263603	5.08752259993455	0.98841459576987	0.514450298182792	0.524997487294609	0.584081078100682	0.979982402750273	0.98289381041862	0.978706637241578	0.982120289390876	0.514853370937467
ABO3	18	84.16	71.99	71.68	67.25	78.92	3040.52494815966	22.9528185521603	31.2439116547983	58.5398067112563	320.299744505962	0.962654083915987	0.500046440520716	0.57390874290679	2119.64042814233	3.75550996196776	15.1147402711897	6.77216299227428	0.985758799303271	0.511172802751081	0.525768672983621	0.583983797551636	0.976561492117936	0.978233657638895	0.979731441241	0.982747715455316	0.581129493711191
ABO3	19	85.33	71.5	69.14	66.68	78.29	3068.82343454165	22.674974462322	32.0700691508234	57.2996027503894	316.901875478606	0.966572000529261	0.505031180433348	0.573809652109896	2020.14381763654	3.49072095004371	15.5759236731652	6.35139704111796	0.987147590742689	0.514450815484521	0.52556700742179	0.583846423828619	0.979156520862349	0.981689921042692	0.979206136246	0.982809226349448	0.549723369099697
ABO3	20	91.1	71.65	68.98	69.3	83.13	3036.08825904308	22.9031404136556	31.5116101335774	59.6339641661884	330.619964404953	0.96495302450779	0.504561778755325	0.572880106767654	2086.30149699087	2.69213866939852	13.9520388626457	8.10664509799564	0.986528389619011	0.514402356615726	0.526067397169491	0.583683578040394	0.978130010916815	0.980869881846687	0.979779527066722	0.98149087677092	0.707456622724067
ABO3	21	85.13	74.88	74.82	66.89	78.72	3052.46211615355	23.4562264848323	31.3577332620917	58.6271628509713	311.511299473702	0.957107381828605	0.487449886345958	0.572410506641355	1855.59240918488	3.10662187803501	12.459485058151	6.62461709926825	0.983603780318262	0.50157371502215	0.527152823815044	0.583156032693244	0.973061918813404	0.971840971220814	0.979643710226442	0.981573497572747	0.621382453438697
ABO3	22	87.34	73.15	71.59	68.52	81.8	3035.72704236783	23.0263768862896	31.5028687960723	58.6272977322079	309.016170036579	0.964565130554793	0.501684755075738	0.572851722470158	1827.66679987836	2.33744235197867	13.3168048519431	5.76709204062853	0.985934796752032	0.511579203440621	0.526367454627009	0.583531896059145	0.978325477234766	0.980659009790981	0.979694741875334	0.981697361084947	0.640883663311433
ABO3	23	85.53	74.65	72.04	69	79.45	3135.30182373164	22.613298572947	31.561090902033	59.175476628215	312.086208325615	0.965842777284916	0.5030354580859	0.573283088787131	1760.2374315332	2.16937352150196	12.5574851744663	5.21418339355389	0.986430906155822	0.512021626751767	0.52591682828698	0.583771185749835	0.979128666039937	0.982449630647684	0.979988924235427	0.982033890642903	0.638365262296173
ABO3	24	85.09	72.39	72.93	68.4	79.59	3033.47581600636	22.6705129478114	30.5082436133928	58.8427884505906	316.341401216202	0.963236799549271	0.502343499021103	0.572596122501975	1940.78449824502	3.20798818839949	11.9685311363307	6.24859280288504	0.986397753902308	0.513095854666515	0.526265139286768	0.583544888962857	0.976519660287739	0.97904415803086	0.980315909130384	0.981237490606178	0.641781457198342
ABO4	1	87.84	72.08	69.89	68.75	80.64	3215.92880856286	22.7960891948702	30.4253709664836	58.8294897004854	308.219612716211	0.969212224737611	0.510643169581115	0.572568143144312	1691.65944625169	3.3225679587757	8.08467663119371	3.16700157652779	0.989959113883426	0.51798720354698	0.524594569161814	0.583299273027699	0.979042680798776	0.985821978003364	0.981972665360166	0.981602703141244	0.759389260606074
ABO4	2	84.92	69.79	70.89	68.09	79.05	3056.21186679793	22.3538568326391	36.9273851768692	64.2538811717933	295.255874727224	0.969664135663885	0.509461069701677	0.571507165191759	1583.48955387052	3.71892574470533	11.1925954696103	8.61416853565404	0.989711519751476	0.519120281858153	0.520398222539708	0.583834182330176	0.979744214665073	0.981393113515231	0.971116670078896	0.978886098978964	0.626532265367431
ABO4	3	90.09	70.45	71.07	68.89	84.89	3153.67640984276	22.3514769113253	30.5967679397785	58.4870792307315	309.723035049042	0.969171370659655	0.509360401837189	0.57238817476353	1525.74576909631	3.59067473784099	8.30020654041001	6.4812117023352	0.989235982859392	0.51717043935041	0.525582413069298	0.582840605397794	0.979717061906968	0.984898522964633	0.981729412797915	0.982066399393827	0.788977969411668
ABO4	4	85.69	68.14	67.82	68.73	80.67	3249.94972343684	23.4240259184097	33.7296075877933	61.7749560487016	319.001018917905	0.968848649467282	0.506994269039023	0.57201747237103	1643.23908778843	4.08866799409732	8.76383977647199	5.58819859724559	0.989337030080108	0.516025139859651	0.524687562099178	0.583160178502605	0.979290797786911	0.982499165015324	0.97862745569056	0.980892546263727	0.747237188674215
ABO4	5	84.68	69.36	69.75	67.93	79.18	3105.53682809623	23.3176989333637	32.3420956105246	61.6925166078904	303.753843748149	0.969799435310476	0.509177976679076	0.571864052337994	1955.35567973197	2.40275067268642	5.64392342314158	1.91884293638395	0.989508729752432	0.517443127883635	0.524904822066179	0.583100342403035	0.980081737685238	0.984026937919992	0.979982573577317	0.980730091807639	0.651706759732824
ABO4	6	93.97	77.31	78.51	83.08	90.96	3301.75032418612	22.8932662853787	32.0520631781877	63.2668825176488	335.550755301504	0.9667005922938	0.50732808016273	0.571422996717956	1623.90007974704	4.76689067176722	7.57785590318762	6.75916468061955	0.988876404406354	0.517146040004674	0.525200891818195	0.583033530904859	0.977574738345722	0.981015111627162	0.980799684391046	0.98008599236328	0.847203278719991
ABO4	7	86.64	70.09	70.2	68.85	79.96	3079.60358035941	21.8538531691439	29.4035022693702	57.4826170269766	302.266668526484	0.969030161604347	0.509262084367592	0.572387175712837	1912.29072160381	5.34582934466497	10.1721689104524	7.4880294183812	0.988354403811332	0.517005804618083	0.52562101993228	0.582832790433439	0.980448063839787	0.98502198586298	0.982361440398812	0.982077853387704	0.782432244932989
ABO4	8	87.55	69.73	67.52	67.75	82.82	3023.97594144053	21.7332470828857	29.5042305632935	57.1405150010866	301.366295885724	0.968986976802547	0.50932458523993	0.572939895280704	1924.84849805091	5.92165656728419	9.81531869902907	8.78354209186028	0.988816639318602	0.517764819073121	0.525069819223999	0.58310311091635	0.979946067119462	0.983698711225108	0.982752512955913	0.98257046576261	0.727909454774189
ABO4	9	84	68.39	68.57	68.17	78.2	2995.0322907207	22.6413293749371	30.6096317484474	57.9893837699937	295.712076417198	0.968711772801425	0.508689934693686	0.572542193021435	1686.76677014081	5.49769960427685	9.4338314825672	7.07962712921455	0.988436613641505	0.516900261950999	0.524756058820023	0.583231982097825	0.980044404903809	0.984116225388774	0.981536278038642	0.981671462806379	0.741377373026137
ABO4	10	86.57	68.88	70.86	71.81	81.54	3117.71276093013	21.8813117076208	29.4077281459645	58.6501160129387	313.222982679206	0.969287094815042	0.509140688017342	0.572482523417663	1712.68451716707	4.44631655042096	9.86995251654664	7.90439418579959	0.988566531272308	0.516357273383091	0.525870144331756	0.582707620638077	0.980497583270947	0.986024046260708	0.983515056116581	0.98245243951123	0.795515849452564
ABO4	11	84.32	69.33	67.49	67.54	78.62	3008.63080166473	21.6927005300085	29.5191317649016	56.8234282342348	311.694704310734	0.969317609234004	0.50895202491617	0.573527364621381	1936.90258658389	6.04467753826669	11.1974237108337	7.81872314790512	0.988482896670072	0.516297458271441	0.52532384699585	0.583272559373915	0.980611412194757	0.985772865549516	0.983527128224956	0.983292211169689	0.825018831013645
ABO4	12	84.56	70.75	72.88	68.35	78.86	3118.99788356016	22.3465098136504	30.2956705439947	57.1896961172948	307.023291845711	0.968805494915639	0.506701618449878	0.573617648120791	2183.19596650385	5.35385633595871	10.8738023673012	6.12376315468265	0.988384437195683	0.514748859168036	0.525154660148212	0.583462133823295	0.980190964625471	0.984366666239603	0.98151962373986	0.983127464265769	0.736352810112153
ABO4	13	83.46	68.76	67.38	67.55	78.35	2965.69263693375	21.9856660953448	29.7777746201931	56.7499985888658	293.320501964098	0.969320182023839	0.509193634450848	0.573341094569934	2265.80525728402	4.22713947503011	9.79694296933358	6.97438369601529	0.988395628501248	0.517159808749073	0.525146269154265	0.583255046396252	0.980700596069679	0.984596300479162	0.982641944223366	0.983002372825451	0.725644598732581
ABO4	14	84.55	69.1	69.37	69.26	79.06	3107.91015518423	21.9646875236336	29.6010880786408	57.8054372720281	307.970254794476	0.96940522488156	0.509790335964509	0.573541292090528	1582.52246175892	4.33601061115367	9.36471146132051	6.86479198296707	0.988650266407726	0.517148395612638	0.525596559934544	0.583067934133867	0.980534024841673	0.985771860242529	0.983951969814492	0.983661179966121	0.802866589765497
ABO4	15	85.56	74	73.57	70.17	79.19	3179.88704581453	27.5328303056442	36.0989103277876	67.2982010288365	308.089582538906	0.969003252890772	0.506850613151825	0.570688952424987	1439.58742000365	4.8388222556867	8.02469876124541	5.03277262224275	0.989048788423286	0.517856847619593	0.524820475261528	0.583260816732433	0.979732510906292	0.978746569600537	0.974370852331418	0.978445553092565	0.604515910041575
ABO4	16	84.81	70.8	69.14	70.14	79.66	3089.40709789995	22.4164219612212	29.783796696575	56.26697016091	294.410707052963	0.969365572258023	0.508588110027636	0.574106766882519	1752.64609440104	4.91896555777465	10.2085074230615	4.64015111779051	0.988643215841805	0.516370021217686	0.52538476422181	0.583599073708478	0.980500909453601	0.984929583689427	0.983375143568434	0.983734883666556	0.700963707411387
ABO4	17	85.83	69.96	68.16	69.02	80.43	3138.93768787955	22.6284238014446	30.4590279898723	60.0295819869479	294.366497391467	0.970281064125064	0.508214787015332	0.572919202237505	2036.22106483537	3.871084804639	4.91927091767901	1.58685389328223	0.98956267596338	0.516197834341155	0.525851576294672	0.583107204698233	0.980515017081112	0.984534907365483	0.982685080204205	0.98252807995058	0.636168349568392
ABO4	18	85.25	68.54	69.22	71.71	79.87	3009.65171467317	21.7717536333814	29.4897132377325	56.2348549745254	297.809621903975	0.96458047739356	0.502969333413601	0.573243164277201	2047.12785297525	5.51587022380352	10.8374392802153	5.72937445145914	0.987525010580687	0.514739847370191	0.525349282416067	0.583318765620039	0.976765618145068	0.977133081853434	0.982531019881315	0.982727109195385	0.728803558482577
ABO4	19	87.92	68.53	67.53	69.63	82.46	3100.49981120848	21.8678840150557	29.6610358604177	58.82485665313	303.550497192924	0.968258472689547	0.50761292082681	0.573026075203507	1928.91603932164	4.42849327618339	9.61832299550824	6.88648051866835	0.988395026846467	0.516595624244051	0.525410780603772	0.582909664388269	0.979627017933137	0.982611731505884	0.983230313153609	0.983044389570836	0.780948494256127
ABO4	20	84.94	68.55	67.72	68.01	79.67	3007.4016511133	21.9033908235001	28.591361865764	56.5518541810599	296.306390202024	0.969873799390057	0.51022835533197	0.573602418287911	1733.99446853724	4.55048530906707	9.00355814821435	5.15899944805298	0.988300626443152	0.517131955914946	0.526216958811989	0.582872908496466	0.98135503857828	0.986650214700497	0.985065930987736	0.984095177399017	0.761692412993589
ABO4	21	92.33	68.67	67.77	68.05	80.82	3022.27900576863	21.8156388398087	29.8893277528775	57.1297743701459	291.500685174648	0.966779955973372	0.502547594373853	0.572995963385648	1984.90189574015	4.91942339495811	9.44121042505739	6.82387285475201	0.987411996269275	0.512629656113255	0.525800971898769	0.583083376948761	0.979104932516664	0.980332660002848	0.982687145056306	0.982699877990177	0.77667198359224
ABO4	22	91.47	70.04	68.78	69.13	87.76	3032.83292446024	22.9583734379594	32.204151352255	59.4861713125515	298.253158506049	0.968703069884513	0.509077445911919	0.573021934517273	2148.26835202467	3.63712886745352	8.88790025906497	4.47036223331116	0.98814493908381	0.518083242846617	0.524526215828553	0.583568370419938	0.980324881067221	0.982617085074562	0.979723296736586	0.981927677308699	0.720640947243819
ABO4	23	86.05	70.31	69.39	68.31	80.95	3069.64969063611	22.7477876104066	28.7090495594542	57.4645275476605	298.183316125253	0.970232615593766	0.510876219173302	0.574029332496113	1610.33680895232	3.12597935283284	7.85303012634002	4.44199168360921	0.988687391459152	0.517911561754138	0.525703449361369	0.583258470057511	0.981334063704252	0.986415938356333	0.984299661842977	0.984176590593724	0.681069356302701
ABO4	24	93.09	71.36	70.75	71.01	88	3038.16523130131	21.7845851081763	28.7729740216128	55.263656175472	297.378993435014	0.969424335258194	0.510907888213023	0.574295066360122	2001.31201876156	4.31269808667391	10.1029743408922	4.92740498516703	0.987897310482533	0.51779320721702	0.525309259233285	0.583294081818729	0.98130071311226	0.986702569852155	0.984673858103617	0.984572078237881	0.741003684096861
ABO5	1	86.23	70.51	67.24	68.34	81.15	3027.20626718728	22.7326654537376	27.5126040689693	53.9952605798989	300.760834793226	0.966492488167302	0.512366367389825	0.573777671946446	2247.79897781959	5.39513771902327	7.51437768983615	5.55760375740304	0.985045277396145	0.518766657775248	0.529613344401443	0.582160301187177	0.981165546747369	0.987662486997774	0.986464437076454	0.985600822962958	0.78716909299254
ABO5	2	86.22	71.04	67.99	67.72	81.46	3147.8655561611	23.2997975989598	28.4236853344785	57.8491072533549	312.045327061101	0.966756809593294	0.510228515928209	0.572696919373687	1891.17035694475	7.91176357772482	6.06006526106953	9.69594112067057	0.985438014801831	0.517193451141551	0.529645542533609	0.582222558271268	0.981042739443846	0.986533210739679	0.984405424154962	0.983639179275594	0.763866726150019
ABO5	3	87.01	73.09	67.33	68.37	81.63	3153.88449020557	21.7361295913931	26.9270041260404	56.9881566092423	318.141462659664	0.966303796770391	0.513311096983222	0.572845314594007	2111.59126363532	5.57672511555109	5.85567433536388	11.8627459391738	0.985705257810886	0.519252894564807	0.529329967257618	0.581965575923568	0.980317178094817	0.988557025596237	0.987104754595512	0.984328520952312	0.842583659129747
ABO5	4	87.66	71.62	68.2	68.86	82.67	3077.2553883325	22.1050842420427	27.6656001498504	56.3147609700516	310.793447193095	0.965214712527032	0.50813393274866	0.572885004721224	2162.03441473991	4.30692581421473	4.4015242794591	7.96354260684592	0.984633557079895	0.515793662420641	0.529539024566052	0.582028109531384	0.980278099996457	0.985149624297373	0.986271627243828	0.984290956638638	0.855900709846342
ABO5	5	86.93	70.36	68.03	68.27	81.36	3080.82761279284	21.9470254535255	26.9582178930465	54.9331160094292	306.096451484821	0.96582490557755	0.510859194064047	0.573040607318623	1967.9734227589	5.44525200575036	6.55672135886376	8.07360719822468	0.98535061223818	0.517844898239696	0.529687136423404	0.582063610630595	0.980184001087412	0.986510045383481	0.986765015040683	0.98449825217179	0.846446800710059
ABO5	6	87.05	69.28	65.74	66.28	81.18	3050.3966765145	22.6630729375629	29.078347798041	57.4982047180003	303.324256944435	0.966640541689957	0.511876828055578	0.57262996231989	1983.98934341207	4.13215694019639	3.43920078587222	4.80819160412147	0.98574475787796	0.518907473364069	0.52903008510366	0.582357983860042	0.980619510237996	0.986451061760757	0.983481207020351	0.983295461194381	0.812460030647668
ABO5	7	88.31	70.81	67.46	70.66	83.14	3111.02804433765	23.1276595884268	29.9137919781027	61.2975709709342	321.136899586756	0.964996984897873	0.510185279409002	0.570835990280941	2131.82419458031	4.86160977462921	1.87865404852512	5.23531466482131	0.98538570907371	0.518421437325349	0.529424681378314	0.58198777656225	0.979308889921894	0.984113006671099	0.981705282723561	0.980838452746926	0.837865938919755
ABO5	8	88.97	69.46	66.26	69.39	84.17	3112.68948529193	23.346612442365	27.9646130098677	56.754231433746	313.712326902022	0.966086300477638	0.510808715964785	0.572341329726258	1943.8235952374	8.32915230788152	6.33611781953344	5.85337604622141	0.985597292298676	0.518224283250632	0.529932575731636	0.582077194893526	0.980203890601674	0.985690428786292	0.984649961187383	0.98327392783521	0.826301509700655
ABO5	9	91.2	69.63	66.4	68.74	88.22	3098.98220819605	24.7948290099068	30.1007832607347	59.6981945916907	320.585585151738	0.965158140624065	0.510435449769375	0.571221426855113	1981.40043710693	8.02946449333535	4.29642507476245	7.12362575162756	0.985438708247753	0.519447191409036	0.529073410529445	0.582152762226636	0.97941975746036	0.982651284310121	0.981448103164133	0.981222565483134	0.758748660416244
ABO5	10	86.64	71.62	64.95	67.74	81.71	3147.14130100669	22.4615477826752	27.8601076936319	56.4226977079481	315.533478928056	0.9661382418084	0.510554373739753	0.572710760651832	2020.28253140314	6.86389846288266	7.32037845447767	8.83763095837464	0.985731650302746	0.518151952852054	0.52937706645097	0.582017340685635	0.980122979222258	0.985337160131344	0.985857365229339	0.984009789084909	0.846543221100609
ABO5	11	86.78	68.42	65.56	66.96	81.3	3053.91337794209	23.0492860303173	27.5124018441781	55.5044443518821	304.940630304855	0.965615169762298	0.509685269339451	0.572863156107073	2054.51289906681	4.42801326416754	6.20132784241688	8.57241340591477	0.985849982807741	0.518332879626868	0.529570000844509	0.582178247568088	0.979474754376103	0.983316492880709	0.986085079577974	0.983999588614095	0.855606114059136
ABO5	12	88.15	70.74	67.97	69.05	84.36	3025.63181987435	22.3134897685627	27.1384242774762	55.1827662568403	302.17621278177	0.966528995038137	0.511041168836378	0.573252330092772	2133.07110917052	4.45450109664671	5.8240969705046	5.82308157173871	0.985826540293211	0.518586458978108	0.529456215466703	0.582184249581702	0.980425009404459	0.985450275434112	0.986676887427579	0.984657916294802	0.837373458928833
ABO5	13	86.91	68.7	65.48	66.87	80.92	3096.35823386452	23.181770349734	27.5344988413498	56.8439611068818	309.568465288636	0.965765545080538	0.507319609322009	0.57284174053917	1826.57203850459	6.92514524623862	5.26442528935133	7.72888772489452	0.985486613747931	0.516075983687347	0.529711806627049	0.582058068166852	0.979988496655077	0.983032780749117	0.985945293618632	0.984165965336227	0.827478150511703
ABO5	14	90.18	69.47	66.08	68.38	82.5	3266.36571620915	23.1863667025899	27.7075696795522	58.8977844905088	327.134049858137	0.965171559767353	0.509312782923405	0.572347555628223	2236.38489644132	5.08676270566815	4.14908415722662	9.75790541498659	0.985524966448385	0.517413191453535	0.529182093564847	0.582055772346963	0.97934764985774	0.984344410494496	0.985297607005192	0.983320813605894	0.825411739081297
ABO5	15	86.95	69.41	67.66	68	81.24	3131.04881965302	22.2699203865992	26.5526679651639	56.5252146112331	316.848966177096	0.965345783780826	0.51181914702502	0.572715225070262	2264.37003880574	3.5032159636381	6.29140961890108	9.86582593855703	0.98558595779348	0.518339698977335	0.529343381480027	0.581980601908086	0.979463816572664	0.987420311496148	0.987214188638196	0.984079577897535	0.872854710182956
ABO5	16	86.65	71.96	70.18	69.26	80.96	3105.32788689922	23.5207731142399	28.0588068998321	56.7338897675677	316.189812475467	0.965559581699752	0.509642941514748	0.572959496362347	2184.56494071773	5.54267689802807	6.39559373052818	8.4554816748533	0.984791644666036	0.517493728530868	0.529778374258516	0.581948128115572	0.980470932028666	0.984829213218859	0.98635669284832	0.984554238910723	0.839279856327761
ABO5	17	89.11	70.38	69.12	69.83	84.65	3119.12515316053	22.4242029907958	27.527130887812	56.7370499179886	317.384243859406	0.965500352790866	0.511584615168039	0.573035104382427	2266.67227338784	4.85188195945961	5.9886581189261	8.68743086773224	0.984903949767019	0.518626588329221	0.52924373963195	0.581968664519916	0.980298995672885	0.986421881716731	0.986887916401387	0.984649413822205	0.856602862805388
ABO5	18	88.77	70.83	69.12	70.72	83.49	3073.21925312152	22.407459573306	27.2989336739978	57.4005820416422	317.462310972817	0.964930733610708	0.510265236415966	0.573196615167176	2144.84152846092	3.73314138098346	5.22706435951006	9.32355717264824	0.984601380051052	0.518004696220399	0.528866696324577	0.581995027486876	0.980021715550181	0.985059093361694	0.986952973521813	0.984882323895975	0.873942460308211
ABO5	19	86.52	71.19	68.46	68.51	81.85	3090.04175580728	22.1645918251531	27.1640004885783	55.2049058498531	308.259878091013	0.965958921836967	0.513706492545955	0.573849784650011	2040.82930098907	4.71575119075839	5.34218916365577	5.89911634852852	0.984868094218293	0.519927131299649	0.528474725711688	0.582060122955348	0.980800299560588	0.988035556563197	0.987400318198345	0.985894346680803	0.864136632420602
ABO5	20	87.74	69.03	65.86	67.74	82.1	3070.86803007661	21.7624375734494	26.5945311193844	55.1274159252697	303.225833594744	0.966444355498004	0.513119020099825	0.57385953291786	2218.12029515098	3.36065952551321	6.46759841815045	6.6611599815621	0.984987752094653	0.519116011745772	0.528608075570338	0.582083512006473	0.981173982562509	0.988447685083381	0.987619247606761	0.985871479059312	0.856426047361113
ABO5	21	85.13	69.47	65.21	67.03	80	3099.54559948969	22.5262829945241	27.4776343731888	56.0603017261394	310.355541112388	0.96569132374244	0.513095554661449	0.573397210010172	1846.95031375302	3.71436817347866	5.73303325400413	6.72260178520505	0.984916187301641	0.51960064126054	0.52850094303793	0.581912728143532	0.980480711143685	0.987480603212286	0.98724056326267	0.985366331201369	0.851924262386476
ABO5	22	96.74	78.2	79.12	82.33	91.43	3047.16731061486	22.357416825384	26.8918611249677	55.6393935855058	312.356095388299	0.965017364337476	0.509681121657816	0.573285595313334	2170.02342165236	3.29144361605526	4.58187390549117	7.55506779010329	0.98430490581349	0.516936860352662	0.529285237332703	0.581841058145699	0.980404911768601	0.98596397500094	0.987430272292862	0.98529587640372	0.868195390429845
ABO5	23	86.66	70.59	67.87	68.42	81.57	3058.22494477827	22.305254238977	27.1380015811757	56.0446152730327	299.36272550528	0.966557174314554	0.512267928718912	0.573491457845163	2138.39849733148	3.41910442142746	2.95883148530957	7.23983500403197	0.985583395432366	0.518827504641618	0.528927224745308	0.581849290621665	0.980695473152259	0.987356923324184	0.98752690539803	0.985635742947161	0.845494656457708
ABO5	24	86.18	68.88	67.05	67.16	80.6	3062.76520226622	22.089036870789	26.6255822167276	56.493121679744	313.125092278096	0.965768197809711	0.51186428129793	0.573413969274291	1791.23449633209	2.70266978310654	4.28533733404378	12.3563199838855	0.984758662038215	0.518477297507223	0.528742198547546	0.582070048360134	0.98071561595691	0.987245311914161	0.987749405012022	0.98512880174778	0.892883445584195
ABO6	1	85.62	65.67	64.37	66.42	79.19	3118.14398077476	22.9449860649451	30.0299566761493	61.579446228389	308.511703741886	0.962294101560282	0.511486797433586	0.567130171673683	1884.38640241008	5.8785816401733	7.62204415540069	10.9683082181919	0.988502605015017	0.519315222917957	0.529186393192688	0.580947326428854	0.973486662228536	0.984925484293752	0.980808074811837	0.976216166033319	0.876245459876684
ABO6	2	85.69	66.75	65.77	66.22	79.76	3098.23907369332	22.9959415951904	29.8623785897265	61.8669650272284	312.0074543789	0.962273858332266	0.512006575641222	0.56706946517644	1838.8880240484	3.26722263789753	5.53339867628367	10.1402573824505	0.988410807001777	0.519635204870685	0.529159516824366	0.581019641485344	0.973556593590074	0.985319260208012	0.980891009285281	0.975990181204131	0.8824196630956
ABO6	3	87.34	66.5	64.63	66.92	81.31	3079.85937377769	23.7900778482463	31.1116717523276	61.9518891272958	311.408598891638	0.963214018907582	0.511249043373886	0.567824299602859	1626.46092666492	3.12865719486885	7.6499118421842	7.68286390963149	0.988613481534975	0.519429372414728	0.528400853000536	0.581509467641304	0.974307994881927	0.98425131601085	0.979694736603418	0.976466130304027	0.867427271012684
ABO6	4	88.67	66.55	70.5	68.49	83.3	3208.14116382827	23.8605017481488	31.6554294983323	64.2808812511867	322.140661041408	0.962909462894099	0.511813557298101	0.567095249467297	1522.50328003135	2.82932127837273	5.53459850362622	9.37655668077144	0.988541648312221	0.519657159767584	0.528636619643553	0.581351395055557	0.974070707630897	0.984906197630394	0.979932951474268	0.975477575680545	0.885109670755303
ABO6	5	87.47	67.75	65.81	68.64	81.13	3148.07139132504	22.9385093675625	31.5725707738711	64.8607797285386	315.455094285898	0.962844694391713	0.512496193010305	0.566738172360445	1854.27751793259	4.78108990397053	6.37588703162555	11.1774287179436	0.988547388050428	0.520170232635603	0.528012349057849	0.581178744091283	0.973999533083179	0.985247061166082	0.979394946826189	0.97515295960554	0.875181505009295
ABO6	6	86.74	64.83	63.32	66.47	81.49	3197.36035443138	23.4307003345104	31.5747654260069	65.4986140290358	321.380131618908	0.962050744081026	0.510566788966438	0.566389154566015	1627.0858901039	5.13405924160243	4.34552435143276	9.86740744650668	0.988167390770194	0.518963009874751	0.528633549463224	0.580985426555819	0.973570624842405	0.983821157291461	0.979664835932887	0.974876698583761	0.884708786473994
ABO6	7	86.46	66.03	65.31	68.49	80.82	3107.56839881568	23.6306078113064	31.2849620404438	63.6241441620373	321.055551393625	0.962488751887263	0.510899829797113	0.567530763313458	1784.52719668205	4.27619049953889	5.68706140003544	10.6722241118812	0.988017208440919	0.519539615666712	0.527962448951219	0.581730811756204	0.974161931254274	0.983370303997874	0.979282075495781	0.975590001155556	0.866144678392403
ABO6	8	86.31	66.78	65.19	67.88	81.72	3049.51557216767	23.22213056336	31.0077349523848	64.1398182749161	315.343739918372	0.962883489369863	0.511263744961293	0.566810377229723	1796.50289917356	5.85151800279776	7.36653243896833	13.3223784266031	0.988124295542772	0.519368437692166	0.528404068548604	0.581177110381919	0.974455838919491	0.984395099619673	0.979783439390942	0.975279939805689	0.878570343748175
ABO6	9	86.25	66.02	64.48	66.37	79.38	3113.8738732687	23.0263289792821	30.989550634855	65.0850883856167	319.841374110952	0.962010939328517	0.511676429099789	0.566302375597857	1917.96521971727	4.98704682964996	4.70599016717537	11.260310350787	0.98759415787557	0.519404093683919	0.529049437299959	0.580932469622752	0.974095413239295	0.985122056837632	0.980061358344644	0.974816188128725	0.886644459386738
ABO6	10	85.52	65.43	64.73	66.74	80.76	3143.63686315941	23.0258684382397	31.4957097369361	63.2376941283786	309.270931911421	0.963498814451898	0.510747503718958	0.567895325179565	1808.90301842407	5.46846527539682	6.52542000051222	9.55805411747923	0.98850980786379	0.518945864959087	0.527584425509115	0.581809208110658	0.974698285021631	0.984201895045881	0.97907513074934	0.976085144859985	0.850154807498015
ABO6	11	90.9	66.54	65.36	73.53	87.18	3132.3830731761	23.1266329081396	32.8889850932776	65.0203251690116	309.958269454039	0.963320895542855	0.511608370820326	0.567114761892783	1969.63810396041	5.05108863522303	4.53390895532716	6.11217842758168	0.98842501274139	0.519801165565335	0.527514367587757	0.581658749426291	0.974601900118949	0.984238598741698	0.977328788970074	0.974995669629568	0.84295626977526
ABO6	12	96.88	64.61	65.24	76.77	94.51	3149.24848299568	22.8365243206564	30.5167375361762	61.9221012889139	314.774626418922	0.962849659904466	0.511563614824812	0.567765542547019	1827.2043558288	5.59608308938467	6.38802556845449	8.22019277155416	0.988191348400639	0.519204060188035	0.528378117015836	0.581511048837176	0.974355484353118	0.985284311219647	0.980458782649784	0.976362433151281	0.874169572022967
ABO6	13	86.05	70.21	70.49	67.42	80.71	3232.01124802825	24.3848949062314	31.9728322350961	65.1162271248079	321.431855987616	0.962629441444813	0.510167118996641	0.567253818992829	1954.15707690125	4.13992154149517	5.74085196657659	9.87764480764629	0.98827809780596	0.518886551757751	0.528443915562741	0.581588671149146	0.974047126595147	0.983195878306016	0.978589872582757	0.975352250022352	0.849024826262
ABO6	14	90.92	65.78	63.9	68.54	85.42	3128.62645464282	26.954223475417	34.7074027377765	65.0525154775133	307.93902042106	0.962582169672649	0.508421904724107	0.56670664645457	1912.33952286248	4.30977260522296	4.77303781686434	6.00680025604823	0.988086288194735	0.519287980935827	0.527672610735276	0.582250456782136	0.974188369146704	0.979075047737215	0.973166207809108	0.973303910462397	0.753801805873151
ABO6	15	87.35	66.21	65.09	66.69	83.02	3232.10959702647	28.6076669116378	36.7722265744257	68.314878652989	321.411711252899	0.962380931740202	0.50829940427445	0.566699163835784	1668.90083797163	4.70499209995314	5.58617911872865	6.60469865885729	0.9883403046202	0.520145442105671	0.527160796516355	0.582473852906486	0.97373437796815	0.977225527953749	0.971574560922872	0.972917773060563	0.765661057047928
ABO6	16	88.61	66.49	66.87	67.3	83.45	3213.19967276162	23.4031302327882	31.9937134173786	65.2719038012911	323.417688705663	0.962601533291136	0.511931706660398	0.567053386811493	1711.60865140492	4.42047242847442	4.85491357982331	9.51759512803669	0.988405619354445	0.519968719232381	0.527587418089456	0.581819233934745	0.973893222015308	0.984543276788172	0.978336668926944	0.974621246149954	0.881749358030472
ABO6	17	86.7	68.22	69.13	69.37	80.85	3143.56859057593	23.5063085255442	31.5143892014625	63.0038380621895	312.732627935776	0.96323895594289	0.511563072706091	0.567670279089005	1854.96624252836	3.89205991657705	4.84827274092014	8.72943772721823	0.988376344266164	0.519665644489261	0.527883245515629	0.581653588944628	0.97456698709039	0.984408105732806	0.979746251925937	0.975959385239941	0.858123745768748
ABO6	18	94.04	77.92	78.59	81.78	91.03	3114.39247916286	23.9817388195763	31.7840939862604	63.6979800535288	315.942458796684	0.9629828540114	0.511298610376588	0.56780550408047	2081.94491381238	3.95850370875342	5.26228351142695	5.5609670796447	0.988213586448191	0.519451183800794	0.528271727838186	0.581892300850999	0.97446834087004	0.984305409866324	0.979156388368953	0.975791402034489	0.86195393673409
ABO6	19	85.84	68.01	66.49	67.12	80.04	3122.2987199729	23.0719173567796	30.8236163151196	61.8097943553113	316.349637855737	0.962814518186019	0.510261748756727	0.568160516286551	2009.43805251546	5.33679260619188	8.07544233533931	8.06752863631132	0.988330887504974	0.518532399072979	0.527833304791086	0.582147494787444	0.97418236175602	0.984049887083164	0.978850962410022	0.975973479872141	0.854399732523426
ABO6	20	86.7	66.2	69.2	70.3	82.74	3048.01993826436	23.4158271162737	30.7203931783433	61.3284509544448	308.086172333848	0.963441907345698	0.511404692822444	0.568239792708388	1842.87351790167	3.51453088171944	6.38834676508822	9.56299718700852	0.988276955611427	0.519521212827099	0.528406681958476	0.581709639771114	0.974870355799843	0.984376922819981	0.98059948198983	0.976844380526294	0.877564845582877
ABO6	21	84.63	66.3	65.49	68	78.66	3060.24053163162	23.0516788668957	34.1777488063319	66.3241711834087	306.283814361674	0.963607138316677	0.510509032933673	0.567295944462506	1794.59428184094	5.09949267351748	5.48203895804297	5.18834656368938	0.98833472239525	0.519683388602601	0.526673041414854	0.58212095732781	0.974980557175361	0.982346259530063	0.974176158447145	0.974532762171358	0.797911376050559
ABO6	22	93.76	66.28	66.01	71.48	87.87	3144.10084076186	22.666955735462	31.0123865893929	63.7307107122045	322.100276830146	0.962998327695064	0.511746728312177	0.567279077298908	1898.53423496418	3.89174787840645	4.1664997430948	5.95743716833381	0.988014622655394	0.519501837059654	0.527843631513017	0.581658760570788	0.974680238139496	0.985072028250429	0.97888733936739	0.975278145458054	0.86660327589627
ABO6	23	86.69	66.13	66.45	66.61	80.07	3074.40559782357	22.8311103947397	30.8803032007225	60.5421192526226	307.930571173465	0.962794333730082	0.510923222945843	0.568753756027004	1816.61643851399	5.16981304221474	10.7930159386134	10.9818272611805	0.987853581976168	0.519159730357989	0.527621525778037	0.581974865897476	0.974632629062339	0.984134926246173	0.979683209276411	0.977282335294526	0.881309632403563
ABO6	24	85.97	66.67	66.63	65.93	78.89	3173.83693658179	23.4638077468002	32.7137318701537	63.7378321076482	315.765404475577	0.962502110101067	0.511506943483382	0.567530999133568	1777.42351745357	3.7049844725217	4.41134426081977	5.14969263513204	0.987969379114153	0.520074527063459	0.527073640009603	0.582277474983034	0.97422261301669	0.983526238771099	0.975735724996302	0.974674486850286	0.843176867917467
MBE1	1	84.42	72.11	70.35	71.76	79.43	3133.40633332611	22.6865646941162	30.1503182161494	66.5801563005253	354.737924528522	0.970979649994942	0.513549794277018	0.569405989782042	1701.1279722359	6.38082181866579	6.89733400411196	5.22995822909497	0.989879275849733	0.521388503409486	0.526278192046716	0.582055170914985	0.980907140581798	0.984965703920955	0.981710551416001	0.978268071885592	0.591746256686556
MBE1	2	85.46	79.76	68.85	69.05	77.31	3041.3993000166	22.9695790702924	31.7555639756673	70.314672306823	357.449257618283	0.97077389437229	0.513100854608813	0.567964853007748	1828.32641242135	7.19740710015748	6.99712333481818	4.13507759404126	0.989429084493516	0.521367991050569	0.526477254128786	0.581810351595702	0.981145500558258	0.984143375535774	0.980152317391679	0.976202729033645	0.54269577672785
MBE1	3	88.63	74.73	74.33	77.4	85.79	3036.82447806858	23.6743431512055	33.336708786016	76.3613425739459	371.567026689712	0.96934929847915	0.512628825799999	0.565262117471692	1879.53776869532	5.7446485819703	6.61593484292754	5.74500411756146	0.989200250252167	0.52148071329997	0.526480275676995	0.581810530250135	0.979932322330128	0.983025474817745	0.97791509390239	0.971557041479933	0.63614700176873
MBE1	4	83.59	71.97	70.02	70.31	77.95	2950.13597704596	22.6536717025758	29.9504130254739	64.7525053678262	338.308551306698	0.972148129109374	0.51353667165689	0.570067600972172	1841.38770084815	7.44933235167445	8.24712142158867	6.63238818854938	0.989982331316019	0.521189011651343	0.526642416259462	0.582105589824873	0.981985332826155	0.985317533901556	0.982721375417995	0.979319922256163	0.59053491894443
MBE1	5	84.59	71.94	67.41	68.45	78.59	3176.69022880434	23.3664755333289	31.755645883028	70.2670693986992	348.625668351026	0.971703170560017	0.512338934822416	0.568197403397204	1807.44878122348	3.9052973108609	3.77017140169828	2.83543321981417	0.990720857425858	0.520945752522213	0.52687514338023	0.581766624825951	0.980804192499537	0.983478476102115	0.980328259421064	0.976675833831466	0.549171057415012
MBE1	6	87.78	71.39	70.5	72.71	81.86	3038.84037853339	22.7274123728503	30.3948187127831	66.6355441531818	333.063033948372	0.972265062322327	0.513282864008519	0.56933083592043	1764.15207334064	7.33080936663396	6.79734560808868	7.66010789680583	0.990586019708501	0.521112273486081	0.526682281197292	0.58204754625557	0.981504930393056	0.984975580357788	0.9815170774444	0.978151767124611	0.541091103639005
MBE1	7	85.17	73.32	72.09	74.36	80.59	3075.25150983542	22.6826477795006	30.1712744048888	67.5231404175398	341.23566672533	0.971604326944197	0.512325208935679	0.568249986382187	1701.7198745005	6.41924618215145	6.89060993586775	13.6778338713484	0.990547744895813	0.520405096377647	0.52715616551423	0.582014828912911	0.980875815376665	0.984473850278927	0.980931584137948	0.976349670408856	0.664234224355003
MBE1	8	82.27	70.71	68.24	67.18	75.87	3026.17116251299	23.1499876345287	31.292104896562	65.9909547053071	333.236056144358	0.972132553150409	0.512277776598331	0.569179045776816	1641.5606134757	4.66198891906828	8.36786511302396	7.51632763259388	0.990440014123612	0.520390916664669	0.526743719863923	0.582165704063393	0.98151583062867	0.984409527901952	0.98042801386303	0.977692505422541	0.550521889153603
MBE1	9	83.37	69.59	68.27	67.85	78.18	3032.55748570785	22.5801281373982	30.2433411383932	66.1313930178779	331.420807039871	0.972348685050661	0.512704711041191	0.569246896289633	1802.11990528469	5.56496441232381	7.34095291895195	9.88265176444438	0.990630651167582	0.520210150942275	0.527556442303316	0.581961247360666	0.981545123709454	0.985572292490854	0.981769966505427	0.978152581243689	0.596913970402578
MBE1	10	82.11	67.03	63.61	64.97	76.28	3034.90235251374	23.2882267798479	29.0563940088136	60.8568229231493	322.931607889951	0.973484188311608	0.506389140401306	0.571913958630563	1737.62838471004	3.8891462682789	7.74596932356532	8.59186873219669	0.992171721257488	0.513945935763956	0.529314369907213	0.582172957897827	0.981165021593041	0.985296516935352	0.983997688773041	0.98237809034568	0.652093229559345
MBE1	11	80.89	67.73	65.11	63.51	74.08	2995.8842216413	23.1549682901629	29.0852644380734	59.8066793628985	314.346464605198	0.973455507172632	0.506821966690678	0.571960327193879	1709.47626223642	5.489593892051	7.695505255185	6.73653250434002	0.992041968850539	0.514294882728688	0.529022822074353	0.582458271762506	0.98126444015323	0.985469588967403	0.983898726099855	0.981976486423893	0.643022442545262
MBE1	12	85.05	78.69	74.66	74.97	76.87	2910.55434143897	24.8499449552348	30.2962277778255	62.6955946898211	312.083648744859	0.973606249817048	0.506763005913095	0.570519006934335	1879.24837406665	6.9731412056483	8.15152892283004	6.89641381082539	0.991467754584092	0.515440031658319	0.528729676686833	0.582112964964947	0.981984784997333	0.983165789980829	0.980841638526654	0.980082975765176	0.523634563115331
MBE1	13	83.52	69.06	67.59	66.9	77.58	3078.20181409214	27.4902872537542	34.9120749390278	73.5367870354794	336.944785261907	0.971962604103987	0.505589347788482	0.566172780471481	2096.08530439819	9.28141891468895	6.97354948508304	17.1918513806136	0.991195203421599	0.516666686194116	0.528952878676102	0.581003354976605	0.98059655731664	0.978559990992971	0.975776822337601	0.974474201606425	0.510631478059423
MBE1	14	81.74	67.34	64.75	64.11	76.28	2976.74683557593	24.7585785127801	29.8405935192137	61.4712956571535	319.592463565717	0.972881236392435	0.507351618889399	0.570728708354486	1769.23435702035	6.43738313200479	6.38004986885486	5.79964424432245	0.991304691289985	0.515863966347424	0.528432272384518	0.582047503562212	0.981414942288253	0.98349885238487	0.981748504790303	0.980553485517156	0.60406099751438
MBE1	15	84.62	68.48	65.91	67.02	80.41	2918.78587057918	23.1684130929056	28.5761757869539	58.8456888082876	308.915593338463	0.973952603584788	0.506533215448423	0.571811147441438	1624.53662626647	4.33867502067347	8.73366612407036	6.00304036086143	0.991777483422232	0.51409210762917	0.529348454459893	0.582236243326651	0.982027339665005	0.985296618896552	0.984133244102752	0.98209473215606	0.624357498693558
MBE1	16	83.42	67.83	65.6	66.23	77.53	2904.07984816923	23.8300045658212	29.2670400252486	59.097394002926	304.785431944507	0.974355836256948	0.505706216168698	0.571858947837334	1758.84581805079	6.2800171766497	8.85983975535315	6.4073987344323	0.991623441122257	0.513700633584838	0.528973429520428	0.582242638292452	0.982586530179474	0.984437594790665	0.982991618240222	0.982166042518683	0.47711864065146
MBE1	17	82.58	69.09	67.04	66.98	77.54	2899.90336203107	22.9302988193902	28.3401854106453	57.3448280853502	307.518206734445	0.97409240328049	0.506862754174204	0.572571714281826	1809.94543245121	4.78837929196342	9.78912999144077	6.95021606223185	0.991377690111163	0.514113179557317	0.529464563727372	0.582384601459079	0.98256437783189	0.985897219383956	0.984446470162971	0.983150503717529	0.605507543998217
MBE1	18	84.32	70.32	68.33	67.7	80.02	2918.83396180492	23.1788743501848	29.2859016095676	58.9766193034874	306.416478744889	0.973982765072328	0.508546423276584	0.572010884806528	1784.4236859658	5.95974751801876	8.12778414988754	7.15956561839293	0.991536849545526	0.515813807255564	0.529286955733023	0.582235793557809	0.982296084627371	0.98591083860735	0.983337736556372	0.982438543173719	0.598985818049649
MBE1	19	82.84	69.59	67.52	67.09	75.21	2976.60982835173	23.005312267756	28.4011477467833	58.7423690152834	317.444252360229	0.973989190105221	0.507179016345413	0.572184987405465	1855.44520738622	4.39141381957239	8.37894751420579	6.33280175987222	0.991592390957311	0.514368086307155	0.529906093380083	0.582128005785039	0.982247543433552	0.986023491439067	0.984406045373074	0.982919532678788	0.620844764425183
MBE1	20	82.07	69.43	65.74	66.31	75.3	3231.72600866461	23.4446234668512	30.3624328272213	71.5728424471891	360.21310964806	0.970736055684367	0.508623554180756	0.566128208674099	1669.54483495805	4.33558058422608	1.99748100631609	20.7640820176726	0.991614858866984	0.516109497113033	0.530080786158197	0.581155276612704	0.978944644691516	0.985495436580511	0.981611317566343	0.974142766067288	0.830012401587904
MBE1	21	82.32	68.82	66.93	66.37	76.77	3196.01203512959	22.8868175093132	29.5960801351134	67.5332156512066	353.769025457476	0.971597361487229	0.508861110937288	0.568436393817259	1549.42194794014	4.04165640159418	2.93577445187637	19.1452321119906	0.991591344680009	0.515885188524646	0.529824595975178	0.581541169529991	0.979836468621828	0.986384417029989	0.982987039766885	0.977465437703536	0.829413339883992
MBE1	22	83.95	69.94	67.44	66.51	78.2	2967.67250474456	22.6048878746591	27.9941188805268	58.9103842331451	320.902735739965	0.973212539781954	0.509285711273737	0.571807929378259	1900.05347220163	5.66990521711719	6.96509340198398	10.8496591449255	0.991419861587713	0.51612591834215	0.529420488146903	0.581945633694424	0.981635104851944	0.986747018846904	0.984880808516813	0.98257963677499	0.706356099317833
MBE1	23	82.17	66.86	64.59	65.88	76.98	3022.4068445536	23.9075162536123	29.8212222094699	62.0785807749443	321.874815233638	0.972730708441977	0.507563763286858	0.570683739946658	1776.23966264301	6.05241306522112	5.98031283274568	13.0885929994369	0.991577860786523	0.515594293983089	0.529461810682693	0.581766064034509	0.980992766085362	0.984424709912531	0.982621288762661	0.980950549072945	0.662453339491311
MBE1	24	82.64	68.11	64.95	65.61	76.74	3297.6440604659	23.3999530073045	29.5674111912474	66.310422943358	367.911096828419	0.969590565719446	0.510120227540538	0.569189794551669	1851.16456197443	3.9332261299306	3.52055167792041	15.7566808118002	0.990869400341433	0.517511873313843	0.528334330465939	0.582215351536076	0.978525086540512	0.985716954229528	0.982403821250729	0.977627596129093	0.824440560558104
MBE2	1	89.26	70.45	67.32	68.19	83.24	2950.23712809287	21.4965283453546	26.4894090722395	55.5788538305765	303.016222659645	0.95763967771638	0.456600314115681	0.573001827584822	1857.2613917823	3.05860646475582	7.15589276626092	6.33455892062693	0.981242595368311	0.471404593480533	0.526672196025513	0.583292246063926	0.975945889667507	0.968595385854119	0.985963040103484	0.982358039990169	0.800332030007785
MBE2	2	87.2	69.14	67.01	68.66	82.53	3048.81068557534	21.6586650822306	26.3905048529273	55.772910217968	304.760929090618	0.941613183052599	0.423116834073999	0.574439470357046	1968.58296047896	3.61991308212902	6.2685165802132	7.76469336957465	0.97650802791075	0.444204321949773	0.525808687641502	0.583188726593728	0.964265685625945	0.952527504047658	0.988148437287342	0.984997555957941	0.729227462239553
MBE2	3	87.14	70.1	66.83	67.38	81.52	3006.30467015064	21.7764094378781	26.6629470382375	55.6550373926342	314.7881847371	0.952095931809595	0.443984801605236	0.574107517470001	2017.88589695591	3.65482408901909	6.82335154712034	7.37557119276117	0.977920511210276	0.459235261803046	0.527044498774503	0.582730867195029	0.973592353259141	0.966791617573238	0.987938406337076	0.985201831221784	0.815108822718518
MBE2	4	92.08	70.58	67.71	68.55	85.45	3078.35769200295	22.9805724665951	28.5025098500113	61.5833779841381	315.422841384692	0.947136133161173	0.432469192036244	0.572181613484745	1882.08639230617	3.15107964493115	1.90349225298336	4.34399164880404	0.976568412056848	0.449887458635214	0.527595709858724	0.582750494174063	0.969861528867512	0.961283058096772	0.985593249371577	0.981863797980475	0.738640314283287
MBE2	5	89.07	70.73	68.36	68.52	83.86	2962.3833745494	22.0912523106413	26.8976943647097	56.2520674399643	307.262202652919	0.949378013222888	0.444667204529462	0.573763833929181	2073.02375314166	3.15329223269854	5.8643530488408	7.56358466786732	0.978717269761355	0.462855457767269	0.52701581892947	0.583240800627961	0.970022745643774	0.96070424809174	0.986745100814936	0.983751193866106	0.791858796645921
MBE2	6	87.51	68.65	67.43	68.27	82.9	3069.96744785736	22.4231178847964	27.0586847768158	56.9980773647763	307.786774877545	0.948360193066227	0.432810918537747	0.573651086773486	2030.59562200375	3.35654963710577	4.80295200520301	2.97571742565199	0.977044565404253	0.449782735168918	0.52617807728032	0.583170636148222	0.970641695011979	0.962266633856461	0.987484379626459	0.983676219643685	0.763404131465667
MBE2	7	91.69	67.99	66.41	70.15	88.19	3049.59356060091	22.7526255086361	27.6179590226657	58.2837357322027	315.50182403123	0.956024447927148	0.458541724392127	0.573757754112599	2146.3481641065	7.72001146908691	6.40108785237722	7.18842972862547	0.979908674916271	0.473342020409443	0.527114940270939	0.583159083365216	0.975626068428097	0.968732342832117	0.987053444348442	0.983878619881277	0.761637568069903
MBE2	8	88.13	72.71	68.23	68.79	83.17	3005.93423346963	22.7035482755051	27.1738149777645	56.9901168461533	311.871699435405	0.945186019198923	0.429868238864234	0.573376306027115	2055.80088374009	3.62985240111865	6.76363948495574	7.75816895420501	0.975868686385018	0.447882791173532	0.527836394203678	0.58311559655823	0.968558610790397	0.959778422693811	0.986409298373406	0.98329783907582	0.73973943062214
MBE2	9	87.49	76.66	67.73	67.45	81.95	2990.09216073	22.7011278903998	27.6021866844968	57.8281576742519	314.503465457092	0.95120637443143	0.450295585310885	0.573470831163739	2086.67484376105	3.77968680887468	5.27155366586881	6.83309224095761	0.978863033545415	0.467471805213086	0.526901613950173	0.583355598990671	0.971746139994874	0.963257206722079	0.986143040454571	0.983055330498181	0.8021395199753
MBE2	10	87.11	70.52	67.59	67.75	81.13	2996.86901344546	24.4190941177935	29.3350942646589	60.008530504627	314.816345277089	0.949917865333372	0.458410442807023	0.572607132721842	1992.14116482929	3.15261642557532	4.3619294668745	3.27058856164201	0.97979043439276	0.477643553230287	0.527416178458035	0.583177248575098	0.969511266888514	0.959733340284421	0.983432679480602	0.981874951605052	0.758343739212832
MBE2	11	88.36	75.64	70.31	68.9	82.52	3047.11382064734	22.6283902006357	27.4340470337545	59.738427991991	321.176170586934	0.943542143980886	0.428549164883061	0.573006099192122	2089.6496737429	5.22122419797123	5.62150014247939	8.78160223872088	0.975275425464384	0.447278089172382	0.527751480099663	0.582863386140129	0.967462236148944	0.958126890758329	0.987081742273449	0.983088169230728	0.755058306296558
MBE2	12	91.92	70.4	66.42	69.47	88.3	2938.40920198668	22.5314259987071	26.8143753590917	55.9467212416269	293.791098001979	0.953980973065321	0.45474317364833	0.573785633804494	1836.90670619156	3.07907067460293	5.3637937300134	4.32430623006975	0.979840095505103	0.470910402671986	0.527530108093996	0.583119253286066	0.973608834177732	0.965668142109578	0.987005061334315	0.983993635214455	0.799892627678246
MBE2	13	86.56	69.07	66.81	67.17	81.04	3073.41258596169	21.850781080597	26.1832254463492	55.982278275292	309.464464322565	0.938221009633761	0.412942966361061	0.573471318104	1983.19276317243	3.17938682476528	5.63971404212568	8.25846515858352	0.973548625152798	0.433190246238143	0.528112548026674	0.582916296006579	0.963712531037171	0.953260074406314	0.987535726508217	0.983797025460972	0.736076597995894
MBE2	14	87.42	71.55	69.84	69.08	82.39	2963.48805529646	22.0718576680664	26.7368570627153	57.2077408561728	312.533508085975	0.948734013215713	0.438861965677971	0.573701038890298	1917.33254237098	3.51707855676363	5.52908560165293	8.31527304592972	0.977160730279281	0.4564892895245	0.526905691545413	0.583164302140282	0.970908862602939	0.96138502205629	0.987686694330375	0.98377256081133	0.80278585784289
MBE2	15	91.4	68.83	68.9	71.47	87.99	3084.86861132606	22.7820056752003	27.2464216189935	58.6356683272253	311.714473649498	0.94431824385254	0.434871424651414	0.573111653640265	1741.39549016017	3.52710221678092	4.04894871065646	3.79192375827469	0.976861705735352	0.454955894322706	0.526615393984604	0.582918923794664	0.966685702088901	0.955854029100576	0.98692884965082	0.983175584538315	0.727582802982661
MBE2	16	90.56	78.57	71.57	69.58	82.72	3023.90803810514	22.7426306720131	27.8129463243009	58.6326682499668	307.077132455326	0.933082574630725	0.404024388572832	0.573213204730636	1694.7578033822	4.63264548351756	5.18633334200341	6.73357368478953	0.970475797289941	0.424417950530304	0.527062853912049	0.583182116361653	0.9614691857709	0.951949341605391	0.986627641132849	0.982906005943373	0.65691575101579
MBE2	17	94.66	68	67.95	74.64	92.16	2929.26561999036	22.2262077992096	26.222980486252	55.9264232770136	299.515153976853	0.940041412836249	0.426481132969844	0.57431418839319	2126.94384457058	5.64444418661129	7.1826497951028	6.97888193979845	0.974151152793306	0.446632372985969	0.525173965579665	0.583647001373808	0.964985166974089	0.95488181951209	0.987808576290948	0.984009490396336	0.685313316710544
MBE2	18	86.77	71.37	70.42	68.52	81.82	2965.92683115612	22.932605430864	27.2600653919264	56.9071665737763	308.715826264265	0.947946927869906	0.449636781238796	0.573253756821964	2159.86829574101	3.80003735834385	6.74097363866568	7.66274886834757	0.978270269803883	0.468501954627014	0.527908986361743	0.583214448405425	0.969003103876339	0.95973298894081	0.986361856648626	0.982921047976957	0.779742793911033
MBE2	19	87.27	71.14	68.87	68.88	81.81	2990.87922928969	23.9091967980088	28.5736186168029	58.8025641530371	318.931235560172	0.930368149037522	0.412017646174779	0.573187242279337	2063.75624947399	4.71147149205786	6.3709350661621	8.65172594626948	0.970583760052337	0.434390599067445	0.527773476525633	0.583521968341509	0.958565543057669	0.948495770993439	0.984999738516056	0.982289054015318	0.615055169483194
MBE2	20	87.47	69.94	67.91	67.74	83.07	3101.73178847216	23.3853945693345	28.3110603259899	59.2961795495146	322.466425168216	0.94089887882388	0.420374439786077	0.572774697250981	2115.03615540789	4.03698296567143	8.26512852105564	8.70763055906635	0.973015348943546	0.438536236063401	0.528275738249475	0.583139961850404	0.966992843273709	0.95858541487847	0.985456638314797	0.9822250826945	0.744081480109204
MBE2	21	87.85	69.67	69.71	68.54	83.16	2974.45833902641	23.0099083695213	28.0240384981645	58.1152699392896	308.162729826512	0.935999092905412	0.413200448875204	0.572823371960492	2127.77196508166	3.66964275910163	6.0977989083186	6.61142330680725	0.971669438814362	0.433163664705984	0.528540749873333	0.582967586637259	0.963289628669936	0.953912995347082	0.985684335195936	0.982599007373152	0.616722628820133
MBE2	22	88.13	69.33	66.66	68.05	82.64	3053.18117287513	25.1175457883223	30.1729922499422	60.4825967179375	316.214906167842	0.950482859910874	0.45100440007325	0.5727466786811	1854.80319171411	5.3076113229439	6.99006545378622	5.54973291546958	0.977785152102186	0.467117252560389	0.528095266603435	0.583365797703544	0.972077411757978	0.965505764561638	0.983041119302749	0.981796809027463	0.735661229972458
MBE2	23	86.94	68.55	67.11	68.34	82.18	3065.15404546481	23.0723689985674	27.8081360541911	57.9643678967222	309.95533476033	0.938953333180675	0.41173226661431	0.573359420415403	2112.98379764638	4.13440358788063	5.89052523322684	7.53385652537526	0.97218388626052	0.430206153476979	0.528296135066416	0.583262589888923	0.965818654732424	0.957058059924618	0.985920491316159	0.983021078935636	0.693101455266654
MBE2	24	92.57	71.73	69.09	69.34	84.55	3004.95961603929	22.3176800639421	26.9172518124122	56.3303019233554	301.959108050273	0.944890150700348	0.426427623467474	0.573505089007225	1965.07692079693	4.19915739885244	7.62961783968468	8.04877481068036	0.974525918773682	0.443466436614335	0.528299508574645	0.583216344535492	0.969589553748733	0.961578122401	0.986576733894742	0.983348793943691	0.741079388738735
MBE3	1	87.94	70.71	67.74	67.24	81.85	3116.81502954083	22.8326670756981	32.4429708457944	64.2878259303469	323.3108408021	0.963009045323197	0.485093906351591	0.570123461905381	1762.38978982679	2.95941115518443	5.8164255390364	9.0272267034638	0.987254513018565	0.499617973200954	0.526927625178881	0.582896897945472	0.975441522550009	0.970929654999579	0.978779090027147	0.978086285782077	0.851978032292469
MBE3	2	88.9	69.47	67.24	68.9	82.59	3121.00189302077	22.7100814349955	30.7350298356823	61.8392780496027	320.264440192247	0.965411649067404	0.501178626932132	0.571085749473606	1588.60764953209	4.12628742678939	8.96890571947604	6.05636267992477	0.989133572307619	0.513334754276918	0.525977305365585	0.583329785483927	0.976017472357275	0.976319297995108	0.980424515484534	0.979010096321135	0.807038288546848
MBE3	3	89.09	68.6	69.13	67.41	84.47	3104.38801070876	22.9836238069934	32.3533335463336	63.1361615276467	322.325366739326	0.965735568421006	0.499885507176106	0.57013329856906	1766.26628129073	3.01674859819567	10.471140270427	7.84938055407397	0.988604498924594	0.511547441233334	0.525436411103685	0.583373330835109	0.976867462642074	0.977202634365423	0.977073845850303	0.977304358005027	0.813255758379752
MBE3	4	90.74	76.43	71.03	69.98	84.46	3162.75756065878	23.4672353295108	31.9751770650029	61.9926198506513	320.738890610682	0.963760523815474	0.487507529858132	0.570700585390979	1626.81974642571	4.27814078769289	9.0052857778347	6.78203021657889	0.987311060330312	0.50095654174953	0.526883026215148	0.582984969400346	0.976146791562368	0.973153336126863	0.97883149645668	0.978928472166267	0.813888996022212
MBE3	5	86.28	68.34	67.7	68.47	80.58	3092.42345193884	22.612618939329	30.6491392478062	61.8905404586485	318.032614167872	0.959135922680949	0.477186902747089	0.56963753785385	1627.45382651307	3.70262299669385	7.88919412121899	7.07498911596393	0.986678034255294	0.494115259054864	0.527215781485618	0.582646284759594	0.97208601933139	0.96574006570824	0.979571730808373	0.977672994326032	0.852352433581221
MBE3	6	86.29	68.69	67.57	67.86	80.45	3062.73083900603	23.1794031216511	31.5408036974974	61.558765018523	316.930322616368	0.964403340128157	0.497536789303703	0.570871283406505	1794.95970907239	5.85955280851324	12.3319423932351	6.99622425017452	0.988506354278533	0.510935770220049	0.526030708343238	0.583082579822461	0.97561673321972	0.973775606059887	0.979005733036788	0.979057346525985	0.769777757081599
MBE3	7	88.31	70.44	67.38	66.95	83.53	3148.92141607961	22.9249726566072	31.1690694192306	61.4619160519337	321.660566288962	0.962007256775091	0.485274901501353	0.570981500542745	1777.33425307037	2.73106374790668	9.22001691059852	7.06243917000044	0.98684035526622	0.499681101600992	0.526570095621191	0.582908860831538	0.974835748904462	0.971169211616206	0.979862472661472	0.979538207273469	0.81488918881436
MBE3	8	86.35	70.39	69.62	66.07	80.3	3039.2226721693	22.5505405093009	31.7645054353314	61.4833381998008	316.885998664801	0.962589703664954	0.483576132268347	0.571636942275732	1788.34997041129	3.66373819319186	9.51823550324083	5.63391893900464	0.986709416744152	0.498045887265447	0.526363639412178	0.583251426235604	0.975555403982272	0.970946944112827	0.979731835840552	0.980086659993559	0.811092667787186
MBE3	9	88.97	69.01	69.34	67.26	83.53	3086.53350403343	22.8326663436363	31.3763033569559	62.6772941265886	319.950950695691	0.965399533131008	0.490524027042963	0.570608202009786	1979.19206568543	3.48236319718118	7.82371645332346	3.96074992412182	0.987585708646682	0.50243099811502	0.526926219136089	0.582890408681348	0.977534936642536	0.97630128093862	0.979835506446194	0.978928789205252	0.811024077556178
MBE3	10	85.31	68.83	68.39	65.85	78.6	3100.173700623	23.1148745378899	30.9307102644245	61.492505707819	317.675990857129	0.964458962013018	0.494557315586951	0.571001200192359	1775.30412323113	3.92018464552708	8.62896894487098	4.67251028146077	0.987876369648821	0.507310155029666	0.527177391689911	0.583061940889781	0.976295204182151	0.97486184868117	0.97986446086571	0.979314820859313	0.811740304481994
MBE3	11	87.51	69.91	66.92	67.55	81.33	2996.50735366911	22.9718648191807	30.9651606247866	59.5993467200566	308.304642888343	0.968687675918011	0.507743193242212	0.571708213492201	1627.76284333492	4.47724279757132	10.6084903926042	5.62362574968481	0.98932245646903	0.515959977672202	0.526120640322707	0.583315692368715	0.979142512720609	0.984074763963165	0.979831557465542	0.98010086300031	0.800518049717922
MBE3	12	86.7	70.22	69.69	66.9	79.55	3083.26597467322	23.2205825084704	31.3757740674916	61.5461736118604	326.28550333648	0.967614521003005	0.507655979067691	0.571267324764395	1949.35848001733	4.91409216222881	9.13237359246591	8.89395037470264	0.988679638551625	0.516229013016841	0.526528191585571	0.58307893316526	0.978693687290374	0.983392963717693	0.979743286352907	0.979742693949264	0.84114642140824
MBE3	13	86.44	68.14	65.63	66.89	79.44	3031.48381123693	22.6419213013075	30.9260858304427	60.2741346183424	310.940686719304	0.963941055315157	0.494390308806222	0.570695401843412	2030.23986730216	3.79390388016289	7.10766985318572	3.98029321735138	0.987372098380901	0.507738776280066	0.5272039445946	0.582748709190893	0.976269287835694	0.973709970367751	0.979892136331892	0.979316458093548	0.817425496332435
MBE3	14	84.89	68.22	66.44	66.32	79.1	3054.04860184663	22.4508118402204	31.1779938025478	59.1067309733629	311.24108800932	0.961164136057446	0.481296775739846	0.57134509853618	2115.81768229529	3.23335138657372	9.70575026995231	5.87071113439416	0.986018814197596	0.495944160758035	0.52680812439972	0.582909758699329	0.974792896664577	0.9704656568679	0.980078289628831	0.980160462248986	0.800456440492944
MBE3	15	89.09	71.75	68.16	66.14	81.99	3036.70051587424	22.3411943697178	30.9683496782735	60.3729995877879	312.556249153367	0.966455917722674	0.498714613612884	0.571710919030429	1802.59694750503	5.01346007630234	8.37708481140339	5.79195791552541	0.987949441208875	0.51008596664003	0.526845531463108	0.58302569724517	0.978244308271584	0.977706987114251	0.97968774442518	0.980593002558542	0.712936415837365
MBE3	16	94.26	77.08	78.57	82.73	90.8	3036.18244737372	22.3771468820357	31.0003298570922	59.6389200004386	313.070282500954	0.966220649069284	0.498167576592892	0.571837939440752	2016.52301287708	5.9945304168843	10.4000208105005	6.85526896685741	0.987651024349132	0.508465716590152	0.526344288860341	0.583218902969444	0.978301672603469	0.979746638443353	0.980118955364403	0.980485948807993	0.827449754718416
MBE3	17	87.88	68.7	70.44	69.66	82.26	3162.4972615573	22.7162401028689	31.4033298638908	60.1301210927487	318.90792188231	0.965265881706136	0.503496473712619	0.571396035812909	1888.95533124789	3.27576837740363	9.85680202919871	5.49728211768119	0.987661097344552	0.513627108320088	0.526212536231886	0.582988079105444	0.977324999740672	0.980276285181671	0.979860808986105	0.980116157245749	0.833702911727772
MBE3	18	87.34	68.56	67.19	66.07	82.19	3111.6485217063	22.3960212214283	31.2222429238888	61.2605175157241	322.733905308593	0.966154465449501	0.504039322378898	0.571328921784547	1663.01281887997	4.65021427459286	8.42866516013381	6.54260648433218	0.98825744422933	0.513969167043574	0.526283429674094	0.583139327884779	0.977634391818758	0.980680077130318	0.979784675976726	0.979746853735502	0.742503891839762
MBE3	19	85	66.52	64.7	66.19	79.01	3157.94639624453	22.4529147221629	31.7642153241959	61.6876977149588	334.583318052574	0.965722294036558	0.503942181920772	0.571648410466465	2040.94527412141	3.24799885452126	7.32034275477584	4.03380027937233	0.988204467728931	0.513874194126551	0.526131239765265	0.583275739028219	0.977249471717081	0.980672288433046	0.980081574100581	0.980065468553301	0.826866737296631
MBE3	20	86.82	67.21	66.55	66.58	80.28	2967.38063737516	22.4769347341518	32.0297904632653	58.6112392107493	305.77934381527	0.966151668583372	0.495136146412395	0.572376073560747	1847.89615815872	5.2852009475252	9.6983153312709	4.9681679799273	0.987759568463705	0.506591060648347	0.525784195442911	0.58322722879548	0.978124332509438	0.977388242458735	0.980023306953039	0.981394635402836	0.803160990987187
MBE3	21	92.03	74.37	70.19	71.12	88.3	3092.67992602405	22.5571944624839	31.1213881355053	60.1340768896378	318.599942898128	0.963817707985393	0.49470313938336	0.571617919234254	1807.86009955457	5.07157137341382	9.33974361315616	7.3724410049999	0.987114859632531	0.506894905615949	0.526482203892891	0.58305599544588	0.976398742841527	0.975948138169242	0.98067443474083	0.980382542498548	0.83627431677971
MBE3	22	87.82	68.51	70.3	68.06	81.67	3058.99756743577	25.206168464758	33.6257100373681	62.2246802639781	313.745623904591	0.965832646945461	0.501115060810222	0.571198290735881	1925.6612059751	6.06612152546535	7.67897400115565	4.63442735444285	0.988032914933656	0.512623254111903	0.525901460500778	0.5833487339702	0.977530841682855	0.977550387717743	0.976446035274931	0.979171218643734	0.751348060794693
MBE3	23	87.62	70.86	68.99	67.09	81.42	3086.58656084268	22.4823951844597	29.9579456391102	59.6154758181922	311.885622017384	0.967136854580984	0.505396158493758	0.571452296076781	1691.29816371197	3.96164553409585	10.4563384392369	8.94326593826477	0.988450472231012	0.514009760434149	0.526909444215099	0.582740298269021	0.978437343854041	0.983242337785346	0.981326876887344	0.980629446383286	0.806705782598823
MBE3	24	86.34	72.04	67.16	67.93	80.48	3023.38575180641	22.9551708254348	29.9877704918229	59.2443825984139	319.503198317179	0.965000619952989	0.501181966952346	0.57190561014234	2031.36176957201	7.06288142244578	10.3749251992452	6.30129120792143	0.987624757037553	0.513067233877959	0.527188750976202	0.582825995941474	0.977092375496514	0.976834874377419	0.981291812441831	0.981263042700259	0.784641629812203
MBE4	1	86.85	67.89	67.1	68.67	81.14	3046.14876714926	22.9678868469789	33.0233097559986	62.1708249875056	311.997000525334	0.964607753757126	0.508095457480603	0.569358819428106	1919.92904928481	2.5133220732992	9.70105755654903	7.88743093205739	0.988539421734082	0.517318510257439	0.527334278319448	0.582951494875759	0.975790881526024	0.982171423225806	0.977020383239665	0.976683007819458	0.790154752940049
MBE4	2	92.25	70.56	72.28	69.08	86.94	3039.7150777368	22.972103732793	32.2280777201162	62.7949294065168	311.956432554541	0.965021735887411	0.508457783446915	0.568790049702094	1696.64338078394	3.85449716594469	9.08987988825762	6.13275455116912	0.988779302082843	0.517088423393181	0.527984992935358	0.582470342139292	0.975972832213026	0.98330916037603	0.977658441865717	0.976513323602102	0.804924196300349
MBE4	3	85.45	68.6	66.44	67.54	80.29	3041.32334664969	24.1865532795388	33.1610015106946	61.9900234752326	316.04071649596	0.964965533981656	0.507365631540955	0.56969401521397	1796.80914570704	4.17281878596574	10.6553381384242	9.22314265761118	0.98871163469386	0.517191041938757	0.526973624867005	0.58295039551787	0.975982784182005	0.981002357734252	0.976454706401521	0.977259848512285	0.783114385975807
MBE4	4	88.02	69.54	69.18	68.99	82.4	3017.51442804995	23.6937411407886	33.4294041489586	59.4599103494661	304.706688228198	0.964295965911065	0.506631389816088	0.570342491006239	2012.26267790647	2.46766265805952	13.3775358494311	7.18805910068657	0.988084853278702	0.516387626455034	0.526046039390818	0.583463263256864	0.975924246496949	0.981106757522596	0.976364320914674	0.977512256423162	0.779145364446802
MBE4	5	88.19	68.86	65.24	67.07	82.83	3015.32552291442	23.408770902879	32.8548601743264	59.6526039141199	301.582267160049	0.964796115147855	0.505687023298047	0.570084228234854	1961.77274703685	3.001076764695	10.9016897059772	5.98120544783419	0.988325778378523	0.51536610920041	0.527094797647389	0.582946864267381	0.97619240158921	0.981219009691227	0.977554662967006	0.977935148431252	0.789098883689837
MBE4	6	92.52	70.55	68.63	70.52	85.09	2982.48951943191	23.5585030171252	33.9810012346811	60.5780620827632	304.233427307651	0.965594371641537	0.507505883641082	0.570279630214996	1968.62321565418	3.84962594147046	12.7669460956114	8.65092566216146	0.989168438981931	0.517440805691869	0.526135016840864	0.583487676059012	0.976167792651515	0.980799886786077	0.975338597320322	0.977363624998517	0.729650494770542
MBE4	7	87.85	70.82	68.25	69.91	82.94	3002.54482721317	23.4458692162336	33.7211610344702	60.2491203457205	303.01466344998	0.963479868015411	0.503208060624004	0.569910441857438	1956.41233855384	5.7624028652826	10.815162193038	7.45593936434023	0.988111212219989	0.515220149039247	0.526804426204929	0.582814144576825	0.975072295608064	0.976685522804879	0.976472699718453	0.977859661026663	0.781736370859954
MBE4	8	85.64	71.11	67.18	67.04	79.83	2989.75847378069	25.0074869405263	33.5877892137323	59.9455377743079	307.357194480177	0.965467486626893	0.507364041544631	0.570502621178459	2025.84847680055	5.58429842658985	11.8075160372641	6.80001446510063	0.989002333968457	0.517531418619944	0.526929896015215	0.583396098100599	0.976203446106008	0.980354087289182	0.97624017549179	0.977899274670986	0.720415375252996
MBE4	9	90.24	68.94	65.63	67.52	84.24	3173.78483519957	35.9124030192642	41.6792655948754	78.4556394313351	338.476574110658	0.944582591643927	0.475402644219052	0.555776377385135	3118.98568470696	26.6099974028722	45.0864788760268	90.9114386229769	0.986769989032145	0.513135260434231	0.530131139385169	0.582347797905388	0.957246979684094	0.926466530124536	0.947058236454843	0.954371905215705	-0.644896716756587
MBE4	10	85.38	72.21	67.69	66.54	79.14	3103.02095004489	35.2557344010579	43.0554257574846	73.4579051410284	321.910039987175	0.947453895474136	0.478638939275106	0.561808901665185	2672.97177782541	27.7906953856431	49.7842657774137	105.187255836123	0.98710111812444	0.514674711825024	0.527291395146013	0.583027867043554	0.959834689757381	0.929983401706028	0.950960987254463	0.963605572601586	-0.830195165963073
MBE4	11	86.46	69.18	70.45	67.83	82.33	2970.62914389119	23.100629653226	33.0454561751775	60.7132363544698	298.149709154796	0.964851345562825	0.506276070326642	0.569615136716365	1771.14160141669	2.88650522194072	11.5960912311994	7.2519378236154	0.988189245655583	0.516285718940085	0.527618179545888	0.582762123963819	0.976383167297803	0.980612191570993	0.976248189004908	0.977440216673604	0.756759680427583
MBE4	12	87.08	68.74	66.84	67.55	81.45	3004.77969005642	23.9410982889306	34.9377819235816	65.5452607680198	311.406000984552	0.965218619504791	0.506693920839912	0.568895980457835	1726.04006660403	1.45274747861554	3.46885853027644	7.09775646366	0.988325836392358	0.516603118191472	0.526764970092629	0.583163840795842	0.976619839291145	0.980818549089966	0.974481071795765	0.975533701954949	0.715185744069019
MBE4	13	86.54	70.13	67.8	67.83	80.87	3089.92257790604	23.5771854631852	32.811506085139	62.73739375109	316.171924168786	0.963890215042688	0.507642388967372	0.569304064032847	2053.09483285946	3.42142354477888	9.90922935899287	5.55890552907113	0.988607656284976	0.517393426564703	0.52749411840021	0.582916054557208	0.97499772423858	0.981153534048405	0.977417736151442	0.976648454922552	0.771972018652722
MBE4	14	87.09	68.04	65.32	66.86	82.1	3054.76675263258	23.2951913384292	33.8478664239829	63.0276156503033	314.739096929719	0.96484332797305	0.508756118936446	0.569285628147837	1909.30300571366	2.67673329697386	12.0737526562787	6.45895091212704	0.988774471058833	0.517601958163693	0.526580990491099	0.583167761923071	0.975797167315458	0.982909957955666	0.976467468750239	0.976195299737668	0.793539068401051
MBE4	15	86.66	66.62	65.91	67.26	81.28	3024.69783973115	23.2021409903521	32.0514751136429	60.0276506327788	309.949459323795	0.964912594721606	0.508087324174227	0.570373706333247	1978.69216839135	3.06263847509041	11.0298784566976	8.29854315281681	0.988534820348575	0.517224717012391	0.526398692075017	0.583302001188801	0.97610380014875	0.982333804751359	0.976952571886795	0.977836018341775	0.780063183990123
MBE4	16	88.83	70.92	72.73	68.28	82.86	3019.80958788931	23.5677578951097	33.3272203668316	61.6737280296728	309.658031506803	0.965344290410214	0.508455574577966	0.57009841958084	1721.05348584751	1.32960916427716	9.50211525058097	5.55452858095235	0.98870579098401	0.517540112404546	0.525909877498773	0.583455924933947	0.976371635741563	0.982446698122832	0.976201358169157	0.977106230681232	0.78938661342496
MBE4	17	85.33	67.96	68.31	68.86	81.12	2912.73812586403	23.7907203525515	32.5959138749203	59.5252876919414	300.353059619783	0.964984378003977	0.505674659274527	0.569918680724152	1927.69205530374	3.58644566415619	10.4895384623651	7.13955594034211	0.988017152273254	0.515421939335295	0.527218845988265	0.583003276729019	0.976687880148353	0.981088736592512	0.977530098470449	0.977556565242172	0.795055612631132
MBE4	18	86.12	68.46	69.63	65.9	79.42	2979.29040703299	23.519270284976	32.5088630042492	60.8024853976071	306.621517173563	0.963192172328486	0.501675075267417	0.569800185063397	2078.03935986301	15.7484217710679	10.4989298126047	8.89962931626762	0.987248249762742	0.515314331054171	0.528058366586755	0.583177666808247	0.975633203259629	0.973532162866783	0.976943551575227	0.977061052735327	0.436428037646232
MBE4	19	88.93	67.79	64.79	69.29	81.78	3040.12828652517	24.6891753021172	33.0584836468627	61.2361667164086	313.737409760821	0.964957781667933	0.506169922081743	0.570301995134043	2020.5553441899	3.15876347606677	11.4394201820814	6.49451373726945	0.987828759693537	0.515981960529534	0.527473839249276	0.583448878977737	0.976847223973618	0.980983756800876	0.976810370719809	0.977466948146804	0.769771657699789
MBE4	20	87.31	68.83	67.73	69.29	80.97	2991.74964426526	24.261064362513	32.8670575306265	62.2514814008226	311.35801083454	0.965659281378535	0.507327722961344	0.570162290439961	1764.859161636	2.17495948517979	10.540572220717	5.843111831764	0.988034901840837	0.516504925611966	0.5273883993383	0.583263412779339	0.977353410875857	0.982232110100887	0.977791593400958	0.977538240780526	0.760716159382245
MBE4	21	89.28	67.67	66.03	68.32	86.9	2984.32492575197	23.9171977286813	32.1632724751486	59.2855584704546	302.858389201779	0.965594587710429	0.507275560894759	0.57060281661138	2052.39841502228	3.47823071455665	11.4290479225145	7.16603901374629	0.988065291632432	0.517008535570413	0.527423997386163	0.583497274084059	0.97725787545388	0.981174441027523	0.976666762704336	0.977901426372694	0.730352836403727
MBE4	22	88.12	83.76	67.25	69.24	80.44	2952.06125324536	23.7171328240577	31.9586848443985	59.4149086048634	300.793300273673	0.966106660788424	0.507844902026204	0.570581549373981	1838.50507323012	2.27126249378708	11.8222986027494	7.10961838024112	0.988377284357067	0.516714946991495	0.527582056702505	0.583284756323296	0.977467487445212	0.982833775146363	0.978666313028111	0.978221260179352	0.766666616422075
MBE4	23	89.78	71.58	67.1	67.4	82.28	3028.52216364961	24.030927046448	32.9537983812831	61.7379201051616	309.733781342882	0.966058174198396	0.508335548257082	0.570063118828912	1867.55636953248	1.78635651307415	9.10884599172248	6.76519358472121	0.988227266261155	0.517575988498529	0.527034517896139	0.583345989937615	0.977566807940209	0.982146698365484	0.976707975770651	0.977229857858244	0.767773194136847
MBE4	24	85.7	68.68	66.87	66.57	79.77	3001.51912774172	23.0937435632931	31.017371975559	58.805292582086	298.40654677541	0.965443855212947	0.504038952759938	0.569957741569399	1976.4714915319	3.58145581502197	11.3487918801522	7.77666328587307	0.987688240020953	0.513928412322263	0.528168668295323	0.582515521872663	0.977478333843953	0.980757126235464	0.978747922878993	0.978442153330279	0.795382237019504
MBE5	1	87.06	71.57	69.07	68.93	81.2	3032.50721574908	23.0554481127797	26.9407920566624	56.2507115306661	308.828015481902	0.964229407538811	0.462350472798681	0.571801665211645	1785.96768947553	5.72727999904166	6.59095538441145	8.49980912866954	0.985005871648182	0.475481567518655	0.528722712491436	0.581544671173427	0.978907268771295	0.972383588309217	0.986412484936718	0.983246332664138	0.857964582142401
MBE5	2	88.94	69.47	66.52	70.99	83.85	2966.4791807746	22.966177189541	26.8424540957483	55.812133113974	296.683211269739	0.966048520256105	0.486456206983885	0.572437678539519	1879.43161814702	6.776890534406	5.65984310902536	7.32394400418901	0.987656801769138	0.501067599552397	0.527949106494412	0.581821570241952	0.978121669921852	0.970839478382628	0.986671672641663	0.983871530066287	0.86278389159065
MBE5	3	85.7	65.26	63.66	66.08	80.58	3024.42410808383	22.9147114136978	27.7807460638833	57.773891407971	303.987135071602	0.959181695574784	0.449619259870044	0.570391083505241	1808.63699160544	5.38744883218296	3.5291996722231	9.04768056310108	0.983522904868734	0.466746695825984	0.529107205894406	0.581012365887298	0.975250999063212	0.963304644448246	0.98556791086117	0.981719352279472	0.875436963724902
MBE5	4	85.96	66.11	64.67	65.77	80.7	2982.64941977906	22.2361534019851	26.6430541857232	55.7596283893949	294.615776747123	0.96485092158078	0.468056640031368	0.571668908248719	1847.43056448429	5.81583105521358	5.77470848861446	9.2097574659868	0.985940297832645	0.481666306486986	0.528640475644729	0.581513418490235	0.978609885103363	0.971744615987614	0.986623933888458	0.983070880346881	0.876853988332376
MBE5	5	87.14	65.89	64.64	66.45	81.82	2999.87028319465	23.4629781826282	27.975409509271	57.8027148141722	312.003610218239	0.964474406156631	0.478825436851019	0.571262380278821	1933.16913601518	5.20760167339952	6.33618276763427	6.35030180105644	0.986351690142361	0.493195975817818	0.528526725647666	0.581729183478818	0.977819996453221	0.970862416419822	0.984958791699492	0.982007429750379	0.881182398447448
MBE5	6	87.46	66.72	65.78	67.67	81.32	3019.3181232667	22.9730367129671	27.4508862275431	57.6479892060001	303.803585966651	0.968279575994652	0.490819857157415	0.571851246757015	1959.40256647365	5.37807273122611	3.18916613135296	4.53350525790373	0.987387533016762	0.501029192626525	0.5281799857819	0.581699938043828	0.980647966089131	0.979623272217753	0.98629318123856	0.983069120963063	0.870834530369855
MBE5	7	85.5	66.76	64.67	66.53	80.65	3104.08121955279	23.6778454353239	28.623869737371	60.3711854773702	311.51376088216	0.966889592973316	0.482042964171706	0.570377294480452	1788.07240102171	3.24282662930795	2.56647405443321	4.75174412080504	0.987068952189789	0.493862790666379	0.52861167483226	0.58136512487393	0.979556282089812	0.976066578170985	0.984867814483034	0.981099949199979	0.862477161466747
MBE5	8	86.32	66.63	65.41	66.41	79.43	3074.95752562048	22.6017593533408	27.4437956753147	58.3466086599924	314.167791529504	0.966222891201545	0.488453808367205	0.570966606248123	1946.28270459804	5.81680332707946	5.88198856211999	9.63922640663749	0.987009899545341	0.500423526972589	0.528480385292731	0.581339114096522	0.978939412509063	0.97608082362195	0.985876180382912	0.982157560713046	0.881519509348182
MBE5	9	87.12	65.58	64.48	66.46	81.83	3120.35980396334	22.6888084035158	27.4894878454749	57.166182019508	310.300131059925	0.966672923858717	0.484546151601548	0.571523125848187	1971.36502149245	5.95638956303452	4.46660033874636	6.53560378463069	0.987128795261402	0.496514503788193	0.527918338278239	0.581744885256191	0.979277403819156	0.975895261678497	0.985499489290695	0.982429137467186	0.863274044658248
MBE5	10	96.3	67	66.3	72.35	92.35	3058.71695495712	24.1076753843664	28.7431027003385	60.9027097302102	313.315069960555	0.967083980379815	0.493549828239018	0.571003639613314	1907.39955128171	4.64347488897734	1.77360398593409	3.59964950630162	0.987891408223437	0.505892053297416	0.527766732577242	0.581839113031488	0.97893753537037	0.975603046187519	0.98452241595936	0.98137720002748	0.853571839455922
MBE5	11	86.3	68.15	65.63	66.87	79.18	3122.68634440827	21.8451187238077	25.6202519286556	53.8077862921228	307.063388481416	0.969859425622059	0.500486024429192	0.573536480332807	1840.49692470457	9.49965274521504	3.96454771688993	4.90365666852755	0.986823465485366	0.50585553809096	0.528114678515583	0.581591142863295	0.982809448238077	0.989385282442429	0.988842674254889	0.986150644435826	0.809767604106411
MBE5	12	85.13	68.12	66.22	66.67	79.12	3110.72127209334	21.7178456770397	25.9201535478599	53.8552402646369	313.363270004005	0.967245004293095	0.504550990009423	0.57411994369198	1975.73734949297	6.28786792211548	4.13008378546783	6.91737292304816	0.986897067150458	0.512489809064536	0.526424911019067	0.582520954494223	0.980087018685641	0.984509313327412	0.988278801818452	0.985578182660335	0.854279055036536
MBE5	13	85.91	68.57	67.2	67.43	80.76	3118.00568703907	23.98311097407	28.5970795780518	56.0398031007927	307.679038153879	0.965992432782665	0.495948737216077	0.572989761294099	1872.29031425257	8.62131550726127	5.49450850248304	6.6670934562101	0.986386406985266	0.507296736861305	0.52739890184961	0.581880230496041	0.979324558754888	0.977630450147504	0.984569555349479	0.984721135491469	0.741070344495013
MBE5	14	89	66.93	64.79	66.84	79.37	3139.9841256914	22.4206625094927	26.7734540509274	57.238980418488	319.568861855632	0.954607803992169	0.461894763458102	0.572713724772077	2052.01647423742	7.27211254500072	4.09756464901613	7.50253862239638	0.982479362810185	0.478993499451602	0.528306758695435	0.581577379062377	0.971631405327135	0.96430278069937	0.988109782720955	0.984759286366004	0.798971751799481
MBE5	15	86.29	67.32	66.84	68.99	81.15	3063.09301532418	21.3855694085739	25.7192202925041	53.709171728015	299.63754276184	0.967156749611211	0.495554081682844	0.573946605372261	1785.26987686653	4.94651954011327	4.74395562527151	7.0679779298592	0.986778655760048	0.505648336495538	0.52701567951423	0.581867750668577	0.980115189932109	0.980037005792102	0.989136547859695	0.986386691327686	0.838396607211155
MBE5	16	87.01	67.32	67.39	68.23	82.28	3041.80504575275	21.5112223145074	25.5657865986349	53.7422652701892	307.993901653495	0.966375766709281	0.501787560100725	0.573739181343639	1954.12953486321	5.11529199896769	5.50009361895396	4.71191391833304	0.98648850248287	0.511568352153581	0.527379767098931	0.581673954634274	0.979611788963614	0.980880771823197	0.989044261964709	0.986358726865081	0.851741734978507
MBE5	17	85.49	68.97	68.18	68.64	80.09	3019.67915894086	21.2888021059702	25.447806109952	53.5320251269802	301.685078522956	0.965870049860095	0.50121532872577	0.573748718236195	2031.22372298664	5.20890293024902	5.77868159844708	6.19345836906986	0.985765283611432	0.511033312712611	0.52722085892174	0.58165556271969	0.979817473710933	0.980787976551419	0.989158222686557	0.986406311586664	0.818955582121316
MBE5	18	85.83	68.41	68.65	69.94	81.35	3059.8416750747	21.6445141825226	25.9694922507663	54.0532488902339	301.868192383398	0.965492637332693	0.494573910455364	0.573714577018954	1981.14762516129	4.52726864447662	4.47957277970721	5.80313998117426	0.985708159902842	0.505501419288654	0.527141480403777	0.581725899463533	0.979491371389132	0.978382832537509	0.988436483821296	0.986228355223711	0.817907302576339
MBE5	19	84.83	69.65	69.21	68.73	79.14	3178.44941025835	21.749410380871	26.2005144968207	54.7498315557766	321.666022392416	0.965951035990672	0.506147794409386	0.573984812853314	1835.84680497256	4.91692664299504	5.62399422713768	7.05780749177844	0.986330436702302	0.515217627002086	0.526627360140113	0.582004110386263	0.979338160971929	0.98239611356957	0.988274910472519	0.986221235572329	0.857775997050375
MBE5	20	85.57	70.64	67.65	68.54	80.73	3176.10402267589	22.4394868949338	27.7504675232226	58.4733596684466	316.662010150902	0.964485384555647	0.496749869757512	0.572821749004982	2263.61981960706	2.88474133579979	2.22435090410681	2.07160304479505	0.985563576138908	0.507773760748244	0.526689502274267	0.581769510744018	0.978613057448979	0.978289758465489	0.986951387020176	0.984619747900517	0.756574791484121
MBE5	21	87.08	67.91	66.99	68.31	82.38	3114.36767687058	21.4094601467517	25.5387822096441	52.7416772729578	295.687737808865	0.963072513075258	0.489299757575896	0.574398832618501	1950.58923190192	5.25749866617587	5.92027275179742	7.26129379469535	0.985462419379351	0.502111116914499	0.526748321378114	0.58194976467911	0.977279796911794	0.97448501157009	0.989148292012995	0.987024769973448	0.817147260837901
MBE5	22	86.55	68.8	68.86	69.65	81.08	3188.62491061379	22.0022749721983	26.7455220620437	57.0351958817734	314.642629018734	0.96131351781286	0.484493170498919	0.573342944704777	1755.23490548601	3.47419506965376	3.71808394408991	4.53193506742347	0.984836827850489	0.498550875737611	0.527049755528756	0.581892365011619	0.976114510168176	0.971802867224146	0.988214029364236	0.985307557168805	0.814625888605266
MBE5	23	85.64	68.13	66.23	69.06	80.22	3045.78172500143	21.1713510910357	25.5587313076831	53.5453409966106	304.497836948192	0.968310187638805	0.512816285479912	0.574468230086401	2098.05981496094	3.87174913066445	4.84816827372309	6.60392608833573	0.986198890221808	0.518895874694749	0.526697486599862	0.581752415628343	0.98186095851418	0.988283604647245	0.9894855348806	0.987478890768207	0.823193327064997
MBE5	24	85.55	68.7	68.2	68.32	79.11	3058.99846743186	21.1994198987989	25.5551172707529	52.4324086129075	301.686959702969	0.967605985216938	0.511146468923957	0.57454863347238	2238.75747077265	4.03301413292632	5.59421828879094	6.52711512274259	0.986021231462602	0.518099975267365	0.526418218463434	0.581807074735988	0.981323681825443	0.986578832898382	0.989079860137796	0.987524315913652	0.79043270143964
MBE6	1	94.04	66.52	63.75	64.25	81.16	3111.39101355557	24.0686149138738	33.0441665827553	63.7834213528044	335.25302276541	0.967074843986432	0.50808892748516	0.570208463821513	1972.4568442955	1.87915561608191	10.181142691966	5.60679688271111	0.991479317078936	0.517051045215092	0.527338098914743	0.583352521227942	0.975385797089138	0.982666860819896	0.97770453452811	0.977468071315161	0.711212561235754
MBE6	2	81.44	65.85	64.76	62.93	75.81	3217.95589756451	24.5489450276603	31.6485126522155	63.1797558797243	350.29709599994	0.966383413514686	0.507683125235005	0.569650669213317	1944.52611641515	5.17700343217523	8.43181651814901	5.77465745874624	0.99157153958597	0.517144593207855	0.528026361854202	0.583160879742507	0.974597772257762	0.981704405117802	0.97792481620625	0.976832790061028	0.733534533270163
MBE6	3	85.45	67.7	63.92	65.95	79.7	3381.42830569741	23.8355053214769	31.6679176531501	66.0503720219612	356.76618349087	0.964020729633598	0.509127192751705	0.568657678946409	1574.21723769432	2.62741371107664	9.21081216656951	5.4229808876936	0.991081788209726	0.518119321691121	0.528178819724065	0.582839637837178	0.972695433517136	0.982644675535229	0.977186078525283	0.975667477003801	0.787499768598817
MBE6	4	82.81	67.61	64.15	64.28	76.43	3275.77067388768	24.166902923662	33.5971458023673	68.710787688034	353.220726714511	0.966033096701749	0.510516811883374	0.567890425213309	1577.13092185557	3.56476267443539	4.13406141090192	4.19235103759303	0.991558777122063	0.519456083951579	0.527620387394808	0.582484479166487	0.974257017325386	0.982791091789313	0.975536370998831	0.97494516253195	0.734265739550899
MBE6	5	82.43	66.95	63.11	63.92	77.31	3191.91754186166	24.7717162147487	32.7914959916321	63.0349434660274	339.607923284559	0.965690404288769	0.507530124071969	0.569811041327214	2066.99866826942	4.60173917216482	11.3371935296214	7.63554008085212	0.991556607538164	0.517860924933106	0.527489773041012	0.582869339690475	0.973913538518375	0.98005101299645	0.97603868414901	0.977596525543451	0.604354163953887
MBE6	6	84.56	67.28	64.95	66.24	77.24	3293.69700705259	23.522249489065	31.9722174078955	65.9804824969565	348.550088031642	0.966458644148509	0.510689327617946	0.568293500289051	1680.12727411044	2.34117111426916	3.93160902193127	3.63066521663725	0.991803994499617	0.519019192315346	0.527835996621234	0.582396091034109	0.974445202387096	0.983950757851091	0.978165969839183	0.975785224244865	0.760745331576464
MBE6	7	83.08	66.54	63.89	64.76	77.5	3336.30745928458	24.0228676208931	32.687742899074	67.9591203151303	366.533121187729	0.965962243033283	0.510534342301093	0.567920745813754	1914.16887985542	2.2766566353033	4.35753885855881	4.48684256213701	0.991750282936833	0.519270511277534	0.527844833668207	0.582478794313695	0.973997446386216	0.983176073382354	0.977118521018172	0.975006732189977	0.767767458918644
MBE6	8	84.02	67.02	65.1	64.55	78.9	3131.56834698287	24.1111132658222	31.9272025336028	60.7226764358043	335.859706054463	0.96639671558691	0.508569244540716	0.571264437196621	1635.30119472586	2.30937437469283	10.5191357554387	5.55982759758124	0.991237206554912	0.517781841357	0.527360774467871	0.583529677371888	0.974939912662947	0.982207570678531	0.977364118438221	0.97898094878309	0.719978067134536
MBE6	9	85.37	67.1	65.39	65.82	80.83	3164.43962684412	23.3278147844373	31.8339687052367	62.4510971989243	346.090763449989	0.966091257341692	0.511038980552141	0.570501117405607	1640.02836600465	3.93683231964369	6.445934061908	5.6189563692995	0.990615381346883	0.519042687953933	0.527459269763145	0.583251031841458	0.975243546115903	0.98457986676714	0.978565821271688	0.978139919623296	0.772917014435839
MBE6	10	83	67.33	64.32	63.34	77.97	3182.18801679128	23.6951484911495	31.8942926672573	64.0094733162233	358.450456200211	0.966178862880568	0.510467597579362	0.570307767984566	2109.51364185511	4.06199330450991	6.50184813637227	6.56106601968226	0.991205965209579	0.518719872953972	0.527664660092068	0.5833695677422	0.97475085581863	0.984091075347441	0.978704030057482	0.977609734069286	0.816672362180792
MBE6	11	90.3	66.06	65.06	68.62	86.33	3115.11513349032	23.4751890775093	31.9106896150351	62.3265470964945	342.673956573684	0.965975153041087	0.509902294237304	0.569107043705289	1832.57830455922	2.36810951394251	9.10582816044305	7.83158956316699	0.990860449681354	0.51832580685216	0.527859323314528	0.582651289438539	0.974885165062073	0.983748614281792	0.977733836337866	0.976754113517362	0.77696730694728
MBE6	12	84.33	67.93	69.5	63.14	76.62	3225.38225707219	23.0978342570445	31.8976923960242	62.8806340115782	348.457962965447	0.966661036792795	0.51101172430866	0.570567106382744	1782.9207390164	5.85891606326055	6.90593826595569	7.52391596319809	0.991248728602942	0.519382258534484	0.526683175961262	0.583365835827222	0.975195234959039	0.983883673174661	0.978371597232332	0.978060543387274	0.73150660837837
MBE6	13	85.9	67.35	66.54	65.44	78.67	3156.4583799117	23.7198262509521	32.0887402044993	63.4167911802135	344.115207879721	0.967206423500987	0.509668640051523	0.57023401220236	1789.69847026807	5.66960850737176	7.48162551511717	4.72286546538331	0.990706487243294	0.518146417595321	0.527973817586268	0.583138818939515	0.976279489389742	0.983638258886082	0.978026257639957	0.977870094876167	0.675638015582125
MBE6	14	82.54	68.82	64.52	65.27	76.44	3221.67915045859	23.3534809055896	32.5763787155492	64.3020201028983	342.605497707383	0.967121161739235	0.509546802051825	0.570509396819157	2224.03679395882	3.47137237467348	6.93859077501108	3.0065249581854	0.991299138068964	0.518334903822336	0.527072923567289	0.583656190393044	0.975609807977007	0.983045514192262	0.977501508357587	0.977475106423468	0.621505761070936
MBE6	15	81.93	67.58	67.31	65.06	75	3135.72712518553	22.2591635532279	30.7970963014805	60.8893335216846	339.953234040688	0.966319006708606	0.511117774242056	0.571339097060819	1821.9041070873	5.43066877145625	9.39703463534445	6.4340713782617	0.990426526154771	0.518417682848914	0.52761604696077	0.583436396177661	0.975659457002065	0.985918866488615	0.980623520465306	0.979265436307889	0.745443882373927
MBE6	16	83.2	67.09	63.53	64.65	77.42	3191.97505861972	23.4316239515077	31.4714145792443	63.3620637307828	348.42374194325	0.966144067304232	0.510183901288197	0.569929717084972	2037.44101206503	4.89109042729724	8.7456810303458	7.28903275000838	0.990570898721292	0.518487703831824	0.52767581429907	0.583434400122025	0.975340653103586	0.983984571895807	0.978045847556195	0.976853125159867	0.730466488306098
MBE6	17	84.63	68.29	72.77	68.04	79.23	3182.47183369422	23.6946119938295	32.1626284641755	61.8646001619696	337.645040405178	0.966499423235916	0.51066955827746	0.570778825392837	1911.99859228356	5.50955710801288	6.96788300943263	5.32518942503844	0.990531082182012	0.519007830448134	0.526747572775181	0.58364403591907	0.975738611964444	0.983934207382818	0.977313989908142	0.977957094162755	0.736908541889627
MBE6	18	82.88	68.19	66.11	62.5	75.29	3124.48376523314	23.5865782050913	31.910715439267	64.0080738781596	348.084191837718	0.965985925334942	0.510015802884735	0.569795560753855	1741.73053906143	2.7376945550436	6.90742489365017	5.04001309995314	0.99019053916099	0.518356705770119	0.527582907377437	0.583368168998228	0.975555599787333	0.983908951514398	0.977367204713083	0.976734060982998	0.733834761664669
MBE6	19	85.3	68.06	69.78	63.71	76.86	3134.01037415269	22.8165582203236	32.1651844291968	62.4863621129221	338.194570398597	0.966241794463242	0.510282196830746	0.570355527159502	1968.51330863974	5.21242113577282	8.15341704207953	7.31110758291741	0.990003428291298	0.518062816840201	0.527305142612376	0.583468567219439	0.97599843278415	0.984981319337082	0.977160432533052	0.977525712957551	0.733828388589684
MBE6	20	84.8	68.39	62.93	64.28	79.16	3050.24576686392	23.1377955102772	32.3758149579784	64.1122245310084	345.138705475066	0.967302651327441	0.509909711889923	0.569812738588749	2006.68689250081	4.60170810422661	9.44074838330283	9.4260500366224	0.989902904812973	0.518117710370844	0.52733601374172	0.583602810031509	0.977169221975561	0.984158043014884	0.976143474202982	0.976370793276311	0.751053789274456
MBE6	21	84.52	68.05	64.28	64.12	77.41	3204.3592232488	23.359930717784	31.5306529402039	66.3056511694719	360.056036005335	0.965679346100443	0.510221830019618	0.569502605389098	1950.5123857406	6.23520675606177	5.4537106982821	11.869258015884	0.990062746467313	0.517844666055311	0.528652469292135	0.583323741255932	0.975371863597662	0.985279686100158	0.978795679520346	0.976306234618402	0.822822082145276
MBE6	22	82.63	67.27	65.05	65.32	77.12	3112.68802784378	23.4112456101076	30.7919847555331	61.3466563296318	346.939507893918	0.966944822094793	0.509981433696939	0.571348972127968	1663.53177301035	4.5752672417032	9.61220629849171	6.43931417480235	0.990111162566437	0.518487858126653	0.526505034409102	0.583920780292892	0.976602283311709	0.98359378277353	0.977344406799346	0.978470010677444	0.714673932429262
MBE6	23	83.07	67.78	67.36	65.63	77.47	3069.71145889356	24.5608506492498	32.7799799292958	63.367432100953	339.424676185364	0.967339415228332	0.50941811045937	0.570130857847989	1816.74198048728	4.45379183463688	8.43594656309239	6.36153381110606	0.99014902020081	0.51805071076099	0.527612840805548	0.583383234155952	0.976963462562583	0.9833363797746	0.976898916315646	0.977283583874095	0.696040168262687
MBE6	24	84.54	68.1	63.9	65.68	75.95	3260.72985226198	23.2563200359882	33.3087640849711	64.1472207143756	354.060160092453	0.966277268176457	0.511893715146769	0.569293826172221	2200.0990551368	5.39359849421821	6.40306766011916	6.4827775166225	0.990045267049519	0.519895067984839	0.52629730733657	0.58301020531192	0.975993018032505	0.98460967735454	0.975497610861111	0.976473174886604	0.766487937130413
ENT1	1	85.53	68.07	69.81	69.78	78.99	2924.74940160465	21.1613539584098	26.6259677426102	55.8125952113714	329.923804725887	0.969355935816653	0.491399864863094	0.574251726387721	1967.26563971096	4.98935284906232	5.79147470737989	7.21135238506584	0.988334453472676	0.501163185519731	0.524906898939979	0.582094101466913	0.980797474388008	0.980518679466626	0.988421126161758	0.986527307080714	0.769371888307353
ENT1	2	84.82	69.79	68.38	68.14	76.85	2943.47975194224	25.2411377822417	28.1657459586953	58.5508584360546	322.346024897991	0.959749597710561	0.486505098493368	0.574291521505713	2027.17384424634	13.326005162267	8.23000205990302	6.94991086510689	0.987841028591842	0.503864494151979	0.525489746571759	0.581907112912689	0.971562802041818	0.965547491716345	0.987243731697988	0.986912702666828	-0.125837622326709
ENT1	3	88.2	68.6	71.55	73.94	84.37	2828.40514529005	21.3534240398425	26.2112641996263	52.9716406557374	315.422984025036	0.96934358004977	0.491990831020988	0.575081143581182	1803.17788450924	3.86947548896116	7.75044566492784	6.30408428283882	0.988378644563589	0.502554662411609	0.525238356363763	0.581996039792356	0.980741121210461	0.978979736572479	0.989004826554244	0.988118654185961	0.661821595741749
ENT1	4	84.55	70.09	69.15	68.84	77.01	2917.87123504784	21.1032678817828	26.3318546635527	54.9085974413366	333.541310610093	0.959939967847875	0.456607943788498	0.574715622138705	2007.10553548591	6.15340208708557	7.2538327422478	8.21634958683242	0.980151804151374	0.46722746209636	0.524939434792258	0.581980074911437	0.979378871499401	0.977271202638187	0.988652891528912	0.98751769504508	0.644156177751362
ENT1	5	86.2	70.26	71.95	72.08	81.52	2926.4184265164	21.8151355584975	26.8208227566509	54.2511993883187	323.216209366745	0.954592457047741	0.457355557986903	0.574915122023686	1887.54488750494	5.86108877348476	7.35139232073536	6.4477388202279	0.980879850024913	0.47189895005125	0.525355415190502	0.582074471048026	0.973200190648728	0.969181130700189	0.988170371310241	0.987700286852557	0.541143367005935
ENT1	6	88.66	68.47	69.83	73.26	83.99	2920.21029089788	21.4455633615362	26.5589389736115	53.8701009254549	311.097928082065	0.956050888226982	0.456138095574287	0.574944705646533	1802.76618269089	4.41672309246896	7.79922832318823	5.00865445392613	0.980799191826643	0.469832103551395	0.525149540795535	0.582014557454578	0.974767206370175	0.970853400877468	0.98841273376105	0.987852792138114	0.509002935829688
ENT1	7	85.66	68.23	68.94	69.22	79.63	3002.27237230929	22.0390281246709	27.7481985882254	59.8449260583999	337.802687916387	0.964724481827278	0.482225755028893	0.573250793051496	1830.59963462731	2.77767301872668	4.51240157271658	8.02692977934066	0.986322083000762	0.494347445818611	0.525094970950848	0.581871591515011	0.97810289200078	0.975479410499138	0.987340526328219	0.985184362685469	0.717730720840991
ENT1	8	85.04	68.05	69.78	69.22	78.16	2849.48864656581	21.3066108532211	26.545578985913	54.2123774374866	312.536663078235	0.973334353027958	0.497913710465559	0.57486276134436	1727.6628115488	4.95576033915125	7.21219538782928	4.73880355023089	0.989828291529143	0.506171021689466	0.524641243125321	0.581963714383183	0.983336565905078	0.98368671680108	0.988309414819	0.987798289028468	0.653841777609274
ENT1	9	84.42	69.22	70.83	70.1	78.35	2981.97510675161	21.6242009149864	26.5776106679662	54.6370979379517	326.449262374283	0.953674067773287	0.455538060383157	0.574633884743397	1817.46356651031	3.35604855366519	7.45784987278182	4.04542172238691	0.98201500091246	0.471658735750745	0.525381510339876	0.581819650155199	0.97114002014955	0.965821314976964	0.988602027533792	0.987649496867482	0.609963925044817
ENT1	10	83.52	70.36	68.26	68.28	75.9	2917.49441587855	21.8527420010409	26.7801066582645	53.9454001375886	315.225279262136	0.959358331896081	0.470562767557262	0.575009745899335	1717.278811527	5.95899506697697	8.10634154915009	5.02799620307443	0.985356902115186	0.485757353566792	0.525380548873804	0.582030010758056	0.973615072707873	0.968719802391131	0.988447314595369	0.987938311205675	0.520800793366595
ENT1	11	86.11	68.69	69.86	69.19	78.43	2901.81404779393	21.5349013081522	26.4251248435069	54.7736314840445	322.476751901729	0.958271432557041	0.464727363771951	0.573861424503068	1874.66137064736	5.41588239574375	8.11532768571433	5.22389186195663	0.982924998821861	0.47853198569961	0.5249247443777	0.582075373345007	0.974918161309998	0.971152143764274	0.988147563563785	0.985888513381461	0.732196299078874
ENT1	12	88.83	70.38	71.21	76.79	84.62	2973.97155327006	21.1745063046107	26.309073556758	54.1656615027688	327.716126903232	0.965664060219097	0.487561659031793	0.574951385831358	1642.35439421122	6.64825692986615	7.29148143951064	5.46865800592556	0.988040586277086	0.500000668554427	0.525061619139387	0.5819509089694	0.977352624609983	0.975122014219307	0.988884724094947	0.987972313419979	0.70528752946408
ENT1	13	85.76	69.31	70.63	69.5	78.09	2894.96709696529	21.3223116619011	25.9682424643278	52.1381397852386	308.609859213019	0.962559910411983	0.466156240990566	0.575363111951636	1752.57686761082	3.43196708649975	8.96176331673973	4.78535857556966	0.982952457914884	0.477219258570571	0.524981628245118	0.581920858832046	0.979253780446148	0.976817747018128	0.988925143243025	0.988730861283143	0.518202842745574
ENT1	14	84.49	71.87	70.61	69.79	77.99	2877.2324696519	21.1830091176647	25.9870079286246	52.3992204575745	310.396988436692	0.966397978877858	0.486272980159351	0.575267024421511	1705.9525937869	7.38185243522829	8.16520677879196	4.54625875497812	0.988272819044148	0.498812634050984	0.525064659669155	0.581911447671973	0.977865585550104	0.974860993816867	0.989100982422873	0.988581727895121	0.570275884950192
ENT1	15	84.96	70	70.77	69.44	77.13	2919.13539293913	20.9472957055704	25.9262702202131	54.0913756055412	320.691640271549	0.970300546296892	0.491980208979486	0.574869609993853	1883.90033217672	6.89091282866174	7.40215577465014	6.16018190032955	0.987997287685972	0.500994862151622	0.524848013467131	0.58181262149856	0.982088269259799	0.982006495768397	0.989327043255234	0.988066584931031	0.648994906407804
ENT1	16	85.03	69.74	71.24	70	78.59	2970.12901293144	21.2685282072548	26.7700590633643	54.6643570668751	328.259413766872	0.965357425627623	0.485429678926134	0.574878225439349	1878.56842003151	7.9819321271451	7.06212611179077	5.95831342603669	0.987744575627442	0.497982938478407	0.524502873690908	0.582313207860364	0.977335081809386	0.974791787866006	0.988100882546998	0.987231987321164	0.677963220245819
ENT1	17	87.37	80.61	70.75	70.05	80.87	2927.62784171961	21.3581830414925	26.794689619363	55.1455903244043	325.09587695332	0.966019388371393	0.482350927238447	0.574835799701327	1873.66320156503	7.45045402996907	7.27185578512668	5.93124936866619	0.98711013182695	0.494095919962924	0.524796162751743	0.582139621682567	0.978633849683498	0.976229326634882	0.988275720550362	0.987453487601258	0.631199223297317
ENT1	18	85.62	69.21	70.19	69.06	78.83	2842.74573002535	21.1043781066874	25.9321745443907	53.1163915065292	311.001400238282	0.97374370796627	0.503457875216694	0.575028065730924	1770.26749087695	7.53791380952458	7.30315778145329	6.02927988685071	0.990877899183939	0.51164888273461	0.524803548780656	0.582016402098202	0.98270807005406	0.983990959827494	0.9888666492031	0.987992887585154	0.638856847127421
ENT1	19	86.1	70.82	70.06	69.87	79.46	2918.3658277384	21.1539543803648	26.1532954865636	53.4029539548201	315.907671031535	0.975435872040292	0.50706923858331	0.574892690921271	1911.38874597355	6.1743931964012	7.63796435954417	4.45917850854451	0.991978336539426	0.513988191777118	0.525099027180314	0.582000445436857	0.983323764350698	0.986538692319202	0.988821254195481	0.987787372722282	0.676761273339676
ENT1	20	84.99	70.65	71.58	69.95	78.76	2912.16268684169	21.2470171004013	26.7895550325987	53.5216130039122	312.555876439604	0.973796952950923	0.503245167304155	0.575092143549259	1767.82170140907	6.25372842163828	7.14900378463945	5.025366847143	0.990949027221905	0.511695805667512	0.524692769405291	0.581903226938144	0.982691264838246	0.983485034917704	0.988465929917706	0.988295161336836	0.592968567074998
ENT1	21	84.15	68.51	70.19	69.3	77.86	2840.90502773084	21.5824985444174	26.3382267832423	54.1619223495578	312.412266362807	0.976162566257297	0.508203277753902	0.574961141968108	1739.66987164715	6.95981407666138	8.70768634357166	5.34861076362922	0.99165203377044	0.514779178685156	0.524611604753265	0.581910061759043	0.984380138409791	0.987225783008455	0.988158295988805	0.98805842990594	0.544706902710373
ENT1	22	85.43	69.88	71.37	69.91	78.62	2899.96938107105	21.6819192487658	27.2854587046907	54.6481548383915	315.181551113074	0.97646473729991	0.507410760642105	0.574820917054339	1703.72877966986	7.14085520953737	7.74179428110539	4.51025193757605	0.992190461581683	0.514035256736581	0.524541245270919	0.582017038561933	0.984150498426779	0.987112759275438	0.987310559838659	0.987635892025817	0.565445759001613
ENT1	23	85.34	69.22	69.03	69.62	78.75	2887.34677161845	21.8367010013542	27.1854723639184	56.2103023202713	324.571638013549	0.975440356527903	0.506294520391303	0.573901137649329	1881.58752128458	8.68086413992242	8.88764316065021	7.49571931252868	0.99192938701581	0.513014617930261	0.524887249957377	0.581788664500913	0.983376810180497	0.986900767923398	0.987218567779248	0.98644262541906	0.648955948771237
ENT1	24	85.83	70.59	74.04	75.54	78.85	2917.27342087001	22.0304610300589	27.0265245623621	54.4210138937722	319.841711529893	0.975691885346964	0.50566084852289	0.574749475068958	2044.45015950259	8.57996355565175	8.11789507564752	4.35139064652278	0.991644760041401	0.512464642699146	0.524740073483984	0.58194554494808	0.983912712155338	0.986723388094796	0.987571730635994	0.987634461778096	0.560884759258149
ENT2	1	91.22	71.4	71.48	71.49	88.77	3108.12101229262	24.3259031099125	31.7652441911675	61.0809707364474	332.745256517871	0.969366245425315	0.504954133836962	0.572954633849894	2290.52387297706	0.524719072938992	9.77442589906151	23.289004168767	0.989312393763903	0.514396182984515	0.525115300326574	0.583049551476232	0.979838372121569	0.981644402777699	0.982534221024658	0.982686003958362	0.60380536326062
ENT2	2	88.82	74.85	76.9	69.57	82.37	2987.53731184045	24.6473536736153	28.6605727181564	57.5050576642822	315.106407169167	0.970415146229301	0.50463136239683	0.573535946481228	1927.69746011597	7.44612235960096	10.0880689710657	5.67620991502755	0.98957678402597	0.513747649310168	0.526035119702495	0.582934069927149	0.980636532600621	0.982255321410076	0.984870854750971	0.983877896436735	0.738065519364389
ENT2	3	94.21	70.26	71.61	72.78	92.44	2996.15007027595	23.6228783755394	29.4793016534311	61.3831852209796	326.941508803681	0.965048176437689	0.498580308657609	0.571568153689168	1861.54100766411	5.33111787653031	9.26266029506565	6.0438735313498	0.988994713090301	0.513124090554114	0.526132774930541	0.582571560649092	0.975786992250155	0.971656404046826	0.983820924566369	0.981112351334721	0.558811535659919
ENT2	4	87.5	71.13	70.3	69.46	80.46	2995.480925911	22.3242750448332	28.6005643751804	58.2337413782148	314.825729162629	0.967479562329226	0.496971603488024	0.573112344003208	1897.62808966352	5.19114811518637	11.0551727914848	8.84076932977531	0.988006053492523	0.508519342685817	0.526231544011585	0.58246835524307	0.97922432652033	0.977291445519452	0.985235256096703	0.983937305510859	0.778535464193686
ENT2	5	88.99	70.98	71.5	71.5	83.24	2948.82839592151	22.7731838204881	28.8729990985714	59.0231633717769	324.13072730937	0.97057381603988	0.503510108847557	0.57301528787807	1984.8484057553	5.33931404008076	11.1818723261653	8.21951241410194	0.98921089844524	0.512452636928456	0.526344090395736	0.582875804752751	0.981159647114025	0.982549552023971	0.984670839908455	0.983082988186714	0.780024299361513
ENT2	6	88.72	79.8	76.58	72.21	82.56	3008.87042669359	23.4640001403708	30.2320394860379	61.6482072170782	333.25516085716	0.969606414791055	0.504257882982186	0.571116378742409	2152.81629460227	3.56489816628904	8.56107537616936	7.43409593761839	0.989447948860253	0.513493576661605	0.526195011022079	0.582810545299315	0.979946864216502	0.982014003486737	0.982574217278675	0.979934874804126	0.700919984602932
ENT2	7	87.83	68.79	69.96	69.47	82.12	2952.5460059473	22.1036044190213	29.1716587507171	59.5613352210498	322.820517283265	0.969510154954575	0.503374664420038	0.572072554521847	1876.06625898901	3.57295413285137	10.3033208311106	8.5539186745672	0.989045151034302	0.513019927833811	0.526133736528864	0.582539038986718	0.980248630652203	0.981199047268008	0.984191183349813	0.982032990470344	0.812603013517692
ENT2	8	88.14	69.73	69.34	71.19	83.1	2986.23980228428	22.6923433923055	29.0933137500963	61.256790135878	327.960782558418	0.969178129010828	0.501766028730676	0.571853112618212	1872.01326183887	5.83054086221204	9.24621162054067	10.593879302688	0.989014222391126	0.511873699285966	0.52655261549386	0.582393241524197	0.979943571152758	0.980253584879649	0.984729431300561	0.981902041173417	0.81428076836678
ENT2	9	90.43	69.56	69.41	69.03	82.98	3014.94335980751	22.5077457721504	29.1867346795552	62.0081814405834	344.747501386192	0.969004945665101	0.503183281989158	0.570190082077136	1974.48734555627	4.92394292923233	8.95186186253133	12.3512128514054	0.989410094458173	0.512720912341554	0.526670344266005	0.582606613655179	0.979376449757927	0.981398007916551	0.982872918057836	0.978687966653616	0.851900151136065
ENT2	10	89.71	70.12	71.23	70.23	83.35	2937.95153193422	22.8151379911971	29.7387824678931	57.2440347876915	312.136890593339	0.970514185511485	0.50394555521885	0.573339084117197	1761.8696009369	4.80047174021799	12.5021219657443	7.29011103114904	0.989573978017189	0.512747171569044	0.525792528793489	0.582985811728766	0.980739396013733	0.982834393170301	0.984314426946574	0.983452894706026	0.787463655597297
ENT2	11	88	71.73	68.87	69.3	80.74	2972.36975910148	23.2818728335985	29.5997458112838	58.845444037575	318.871021529711	0.969907259862609	0.503079709847088	0.572909992273405	1857.30788211777	8.44406394981944	11.1882488880204	8.29046398143667	0.989113004587012	0.51266711049663	0.526228050804013	0.582927129932925	0.980582860972067	0.981298974610923	0.984107572482534	0.982815797815633	0.771709097451163
ENT2	12	87.46	71.72	70.77	70.48	81	3004.11050892469	23.6168508888677	30.8175795620307	62.9111502199386	319.570694037837	0.970988293052012	0.503681790108109	0.571935694799331	1947.52917756891	5.3556651565179	8.0579709371837	7.99806044990031	0.990036083356281	0.513052486879981	0.526574456468118	0.582568941934077	0.980760509011252	0.981735403274511	0.98319317787102	0.981747658741566	0.757311561813349
ENT2	13	87.78	73.44	75.12	71.04	81.65	3038.98560179774	23.9210989109717	30.3989912065095	60.9173761605403	326.184082722773	0.970545474105268	0.503130122016368	0.572372845594109	2033.75942420608	1.95976515985728	5.8944610879918	8.66366288663627	0.990001523020302	0.512868732608679	0.526437233493704	0.582866749924234	0.980347455571909	0.981011494807305	0.98313859235961	0.981996049128743	0.69864977387704
ENT2	14	88.81	69.4	68.71	69.37	83.38	2983.4103463852	22.740307561738	29.3632859821477	59.9779624640838	322.844691304822	0.970091555812559	0.500176061833033	0.572368726871241	1774.87639118916	6.21939630798006	9.63103259775518	9.68323115100667	0.989392360685526	0.50955610306465	0.526544590978146	0.582882831172697	0.980492264100772	0.981591739996436	0.983971350776286	0.981961890556456	0.81667959198158
ENT2	15	89	70.76	71.12	72.08	84.65	3055.10514429497	22.8671647315798	30.1529126971674	60.3424270397596	324.953738032084	0.96908208655086	0.493985581550487	0.572292198253804	1782.91863487825	6.24743306760068	10.3459767933985	8.26657955686998	0.988357531236144	0.504019957123824	0.526286486334501	0.582658445997944	0.980497498044887	0.980091312989673	0.983560037873312	0.982208705948842	0.799160043778965
ENT2	16	93.6	71.49	70.81	69.67	85.49	2918.42278433285	22.6200834292188	29.061348051245	57.5185019831847	317.377625211628	0.96904906238027	0.492748830472116	0.57244102486915	1797.209721089	5.16759415979443	11.2443700878787	7.78403642905409	0.987996702907881	0.502886210880698	0.526733118067002	0.582613041947373	0.980822162187542	0.979841601958367	0.984655680599264	0.982540697948979	0.817285014446331
ENT2	17	89.29	71.83	70.57	71.01	83.77	3025.32232936828	23.7355671350722	29.993048191128	61.5363458635065	323.72569751558	0.960963072184337	0.472506475856617	0.570893522882538	1941.20496188216	4.55853717972161	7.81093035505336	10.3312795653886	0.98552771309528	0.488476788414057	0.52713153953838	0.58213614453183	0.975074632012334	0.96730589265195	0.983379951945676	0.980687298401075	0.770149826440931
ENT2	18	90.94	70.29	68.48	73.25	86.53	3008.60796135871	23.0837610297971	30.2527561338087	62.499787598821	333.260102415038	0.957632687005498	0.459468724037262	0.57122440995335	2025.75838917408	4.60237484028536	8.90534259705448	8.82318830183568	0.9839234065138	0.47653154706767	0.526873658755466	0.582615864924361	0.973279709239305	0.964193717844277	0.981870354058173	0.980447743261352	0.745591484714667
ENT2	19	92.62	72.82	72.52	68.97	82.97	3009.10113838977	23.5225323404422	31.0507956889033	62.3690065021437	332.420921979316	0.964919992039097	0.477266607327074	0.571427070133175	1750.56469169685	4.01616520682559	9.79554429768457	6.92269988053508	0.986581990653633	0.490826474846315	0.526765730618877	0.582871333225793	0.978043387351735	0.9723733983105	0.981919021362097	0.980365712910802	0.816367513483981
ENT2	20	89.37	71.12	73.04	70.26	83.27	2945.53519688875	22.7883791734875	29.4082651518488	62.1252500802727	328.754562262054	0.962619692611305	0.474300706546909	0.571009527504653	1779.23193596403	5.4268500069151	12.372274542815	10.5210817049342	0.98641445489719	0.489949028227846	0.527077495892685	0.582532874472734	0.975877520683367	0.968061327241454	0.982419534374978	0.980218546500896	0.790924745436435
ENT2	21	88.64	68.99	70.26	70.44	83.1	2979.3593820031	22.7331132372142	30.1330302082264	61.3749393649289	329.494284271227	0.966071081590461	0.477380359350264	0.571707014486892	1702.6706295494	3.3585357808956	10.3606524601978	6.24060644653932	0.986652651975632	0.489697123706013	0.526676565492951	0.582769391806275	0.979140003988274	0.974848199510474	0.983277888183255	0.981017573203191	0.817443277427339
ENT2	22	91.2	76.16	71.13	70.54	86.98	2963.40703622588	22.8513922239878	29.7392231560939	59.9037329586227	327.434349508065	0.969029649383263	0.494009247929664	0.572228664908656	1864.40853316505	1.89953355902951	12.1096845301476	8.37976268205532	0.988360212015718	0.504844858003723	0.52661179040077	0.58302702290786	0.980441783878541	0.978536752623558	0.982625605793464	0.981478803597564	0.813500846117875
ENT2	23	88.56	69.97	71.61	72.04	82.7	3001.39202918193	23.2344855211272	31.4094453638627	61.9527328252539	331.215642094719	0.96574802134467	0.480848451212884	0.571559530470815	1788.6748346439	5.17832011590086	13.2499403858279	8.49100580258126	0.987155854983289	0.494753850458391	0.526255093386527	0.583116365956604	0.978313623395385	0.971894308184516	0.980490828653919	0.980180910431436	0.761049800242305
ENT2	24	88.7	68.34	70.15	70.32	84.04	3033.55600983329	23.2795567733289	30.2581441998471	60.9666336200478	331.0737793324	0.96610224183323	0.484489278627305	0.57196959813746	1743.86894397964	1.77473394175352	5.80248229521362	2.83287842889538	0.987868232544478	0.498012387971008	0.52719496237902	0.58269291064194	0.977966706495679	0.972845837432279	0.983519877152162	0.981596974480665	0.796173653366208
ENT3	1	87.86	71.18	70.89	71.43	82.7	2886.12192636545	20.9877094255345	26.6903212427022	54.9672035792309	295.230093851864	0.971824956116091	0.511574282497048	0.573781369879818	1939.52841854195	4.3509136093672	7.84088429347775	4.73234769323358	0.989532531953089	0.517763982417177	0.52682346332393	0.581638199170029	0.982105109973446	0.988045325417901	0.988268638095931	0.986491895990631	0.709229894427155
ENT3	2	86.33	70.14	70.45	71.45	81.38	2867.91033677005	21.0420820404681	26.4535294129672	54.2918112341993	292.660285746301	0.972775749318816	0.510074666019303	0.573779957419286	1836.47833220073	5.07394503978427	5.82717680023282	5.38579838377948	0.990179385422676	0.515820814686236	0.52659543175031	0.581524909685408	0.982423754362013	0.988860184577026	0.988648748586808	0.986681650025429	0.728490802187816
ENT3	3	87.15	71.53	70.51	72.28	81.71	2868.52076891681	21.1012090681757	26.2827715785625	54.6584522145155	294.702742136041	0.972434624291171	0.510916468851823	0.573884618832029	1957.16583606354	3.24903909490906	6.52708344606186	4.81828040263332	0.989884361981043	0.516899455813579	0.526572521436266	0.581619872543059	0.982371943269263	0.98842524035484	0.98849316936447	0.986700499628376	0.705993035946652
ENT3	4	87.37	72.96	71.73	72.25	82.34	2874.88975614055	21.3068405002573	26.6821473009366	54.7554833963628	292.544120834869	0.97263428524585	0.509002083971726	0.573768013290159	1954.83272755131	7.18393729430887	7.70121350571189	6.14578232176135	0.989967419633914	0.514957793619489	0.5269330866461	0.581662746570209	0.982491207241472	0.988434567412016	0.988484997621988	0.986427301169619	0.728100800677201
ENT3	5	88.1	72.01	72.28	72	83.24	2922.31500575532	21.3756106864169	26.7940689745495	54.9574482191632	302.282630568107	0.971323473696314	0.51121191993079	0.57412336477992	2152.59394845362	4.43140044314929	5.51524650525127	3.47959358641141	0.989355878002473	0.517657145545924	0.526194684000715	0.582016507528469	0.981773591579031	0.987549238582737	0.988229883542474	0.986438283714552	0.736936061084643
ENT3	6	88.63	69.36	70.24	72.14	82.62	2916.44061283265	21.1087583478705	27.9681656904596	54.9345259851773	302.455891973886	0.971842906399197	0.509859439493351	0.573879150906386	1873.20407982189	5.7832758569113	6.80588317379338	3.52852304378067	0.989990374931024	0.516317489949872	0.526156781172049	0.58204046414075	0.981669045486335	0.987492094336861	0.9870309872637	0.985978099913701	0.707262882990394
ENT3	7	87.07	72.6	71.03	71.2	82.22	2856.18509930621	21.3477450118281	26.9964394615744	53.8215213816294	294.33324550583	0.972368061870915	0.510367676943695	0.57389949572657	1810.8816018545	6.36784828882834	7.89705582828592	3.54282109469741	0.990650463971324	0.517197467883333	0.52683367971527	0.582036919373593	0.981545052704949	0.986794616440042	0.987674680675018	0.986019059313659	0.73576057491306
ENT3	8	88.62	71.61	70.39	70.92	82.56	2944.23797640945	21.6061746011313	27.1170661696036	56.3244150801048	305.57864916889	0.971684920301822	0.507786321033242	0.572998662087469	1905.76258839056	7.07430970044615	5.6727751598912	4.92052796432028	0.990404504449463	0.514266233966204	0.527150817674209	0.581830658929646	0.981099051888857	0.987399692017525	0.987268741691185	0.984820330956047	0.771421575597884
ENT3	9	86.42	70.6	70.77	71.6	80.85	3021.4057074152	21.4650094325317	27.6828198354841	57.0876758876302	309.579425271254	0.971417510807909	0.510541481776623	0.573471115365204	1859.11227865386	4.47776897330535	9.08014273007615	4.66332443809853	0.990291712060769	0.517926210831966	0.526733655600905	0.582164872886011	0.98094076621768	0.985741735210736	0.986781447452955	0.985066502762853	0.724160760586731
ENT3	10	87.87	70.19	70.2	72.9	82.57	2913.87645033916	21.2015276136545	27.6305881588698	57.5777736069557	305.967558192916	0.971968982915257	0.508802452401432	0.573037295647702	1763.2605318393	6.11857349736931	7.15382322092035	5.8795405667278	0.990637389769295	0.51526122943682	0.526493800547838	0.581944812931224	0.98115515621878	0.987465043619821	0.986875650261478	0.984693536078351	0.766728616199407
ENT3	11	88.47	69.47	69.1	70.7	84.25	2858.95669352579	21.3618647767323	27.1066796613131	56.4603721659675	300.148124929276	0.972217810578062	0.508271224304767	0.572931569594451	1873.22986753264	6.05153819601085	7.06833398386044	4.78473095181863	0.990401008605429	0.515074561580559	0.527167840023585	0.58192274459325	0.981640569961685	0.986791548674206	0.987391422403393	0.984549194747347	0.716759979489414
ENT3	12	86.42	70.46	69.55	69.92	81.21	2875.04094172841	21.3619914714014	27.0828320602092	56.9808246218977	297.536000988101	0.972359368098368	0.510115269819705	0.573038511123527	1755.02898861255	4.76668860729225	8.18312080457097	3.5931626858008	0.990557096724502	0.516976650025779	0.527110031489076	0.581781620276454	0.981628793851148	0.98672787212782	0.987368940109362	0.984971836771378	0.689193174520355
ENT3	13	90.98	78.96	70.84	71.22	81.87	2938.31199291543	21.3449983073575	27.507084602632	57.8254430936301	309.077149795119	0.971881396329034	0.511757807657043	0.572910343975656	1800.85002166164	4.25597257744914	6.31061423139824	3.91065734522595	0.990699205149065	0.519005793289379	0.526379549706098	0.582062020353494	0.981005527487832	0.986034865648802	0.986681835846051	0.984277145634275	0.738472910101239
ENT3	14	88.78	70.76	70.67	73.63	85.07	2876.3241067284	21.1951953852836	26.9016194890488	56.1294525207494	296.152166624276	0.972260503637076	0.510315393350676	0.573336232102602	1853.50205708187	4.65689550969601	6.83082994575548	5.37539168112211	0.990488941166529	0.516754264839498	0.526695424242003	0.581929194482334	0.98159652594608	0.987539780652178	0.987752577928261	0.985233663371407	0.727490039568523
ENT3	15	86.71	70.13	70.3	71.94	81.97	2925.44286700813	21.0332324543312	26.914093033773	54.5158586787966	297.728064418276	0.971766817731432	0.510682052492868	0.573954294547338	1896.19799463989	5.05884892608457	6.59300739636363	4.04004157270473	0.989631696054834	0.516832994185119	0.526093935028442	0.581741920773108	0.981947952561927	0.988098782853542	0.987909156191102	0.986613262775663	0.685818717431644
ENT3	16	89.65	73.29	71.17	73	85.9	2971.27936748733	21.4549556696208	27.2465434531685	56.2214545641508	306.548444803268	0.971575116151673	0.509770993810052	0.573449460623233	1685.87999857472	3.59924241893782	6.90028357136921	4.36511662050973	0.989513962441868	0.516672804625591	0.526515774464	0.581786802051241	0.981871052889515	0.986641815180228	0.987057029883793	0.985669421515558	0.705759441414247
ENT3	17	86.98	71.03	70.31	70.81	81.87	2973.10971182636	21.8570322709604	27.5304484106788	56.140941322644	306.012089853819	0.971235040259207	0.508495690474737	0.57323411992568	1883.61123134093	3.9649933309526	6.01116749546455	4.11670519328067	0.989440914764392	0.514913128356442	0.526561079191562	0.581982888742799	0.981599836601137	0.987536853250977	0.987029048882169	0.984967309200416	0.76927674903066
ENT3	18	87.75	69.89	71.42	71.37	82.25	2937.85820563501	21.3075770631713	27.1397599342335	54.6004555169613	310.006870825434	0.970913821517948	0.511047910630643	0.574071011443077	2050.63838702174	3.19197508156792	5.63749369639504	5.11458355123624	0.988824277543205	0.517341321698407	0.526331586522267	0.581835980040399	0.98188711944881	0.987835089130125	0.98769732239825	0.986654368475487	0.725901003073287
ENT3	19	88.95	71.25	73.13	74.9	85.52	2923.05607797295	21.0077634872791	27.1579522330956	54.0100408292404	298.683292210011	0.971387504883211	0.510640494088368	0.574152190868621	2055.1916266144	3.76858172771648	6.40964964081641	4.65792575684227	0.988641002486505	0.517171476213584	0.526027629559976	0.581749902647829	0.982548268218797	0.987371727897618	0.987251167851774	0.986939900213774	0.643856496327483
ENT3	20	92.34	69.97	70.89	71.92	82.73	2954.42384675493	20.9475130113614	26.1634569129868	54.004020749978	302.682470226171	0.970423876557828	0.510155429187002	0.573875472411983	1964.61646781892	4.55981041088657	6.10081585597884	3.85846673204418	0.988596330677194	0.515899925055669	0.526827466181715	0.581595704857235	0.981617922750212	0.988865096524202	0.988828586472656	0.986725774656216	0.727517150370885
ENT3	21	87.1	70.78	70.99	71.36	81.83	2950.08874626395	21.6705610913112	27.4558602615776	54.2706101477996	307.962764797094	0.971064971042403	0.510598817671514	0.574130024485305	1976.25607634841	3.17982930138352	8.08789710059961	4.0710434235847	0.989345911394461	0.517463362288324	0.526580951049337	0.582054344122976	0.981522195481365	0.986734240301663	0.987296144897149	0.986385601760929	0.684044329672013
ENT3	22	88.44	72.16	71.94	74.74	84.53	3089.15729817609	21.778591385313	28.5705103907246	57.4605313367624	319.674799026864	0.970021430663184	0.507912615644974	0.573466879492798	1644.22013079695	4.63709550574475	8.56654070759038	3.50711340566317	0.989731587556228	0.515529928131579	0.524969043872482	0.582023644299996	0.980085351280229	0.985224305959866	0.982787711807571	0.985298252242845	0.663392072528542
ENT3	23	88.91	72.78	72.96	74.47	82.15	3034.48238114819	21.3935873613036	27.5807490377063	55.6982075002104	314.541391716674	0.969510661088047	0.510563957521413	0.573589694036909	1854.71265554479	4.83976817275151	7.01297083542427	4.14389405492703	0.98902393186893	0.517605283634185	0.526224365275329	0.581948610070748	0.980270173297011	0.986396340347738	0.987074342111677	0.985636333021187	0.711459235772599
ENT3	24	86.85	72.48	72.55	72.33	82.73	3011.59746765464	21.6941850694511	27.4219962238395	56.4618395331444	318.756439173332	0.970325704246577	0.507931779591616	0.573806198034712	1931.55120477515	3.28708763739694	6.2391108890008	3.51995956064053	0.989390624956392	0.514577858820925	0.526036877550185	0.582074907813589	0.980730643459801	0.987084404982876	0.986949038032333	0.98579442324711	0.749318054645004
ENT4	1	91.9	74.57	70.39	70.37	83.43	2968.98524862712	21.574841450127	27.3885295004522	53.380053585509	304.028631812496	0.971493471543153	0.510214304273158	0.575752590044953	2003.75837876827	3.68302182123881	9.94615440456773	5.19893786632494	0.988701361031027	0.517152734179484	0.522603686298303	0.58304811827362	0.982595462931366	0.986583402836815	0.985200143689379	0.987487262200129	0.591852626284184
ENT4	2	88.04	71.14	71.15	71.34	81.79	2885.60049326451	21.2640265339275	27.5509482278972	53.1368559251882	298.354212407782	0.971628104304277	0.509744715630967	0.575505848949046	2035.22765589689	6.16085406845326	10.3904341515981	7.61736733731444	0.988729686776465	0.516554025580834	0.523431230246912	0.582887228854473	0.982703480333493	0.986817816505813	0.984926220895211	0.987336521474432	0.634207525400524
ENT4	3	88.23	71.13	70.39	70.91	83.33	2884.5046471702	20.8609125836601	26.3482632894787	52.199733729568	295.096254894278	0.97193167707825	0.511285259950892	0.575490346505335	2017.32102179404	6.15634623340828	7.17397419086634	5.97084650579294	0.988676232759019	0.517159764382101	0.524599626535414	0.582433932778805	0.983063661160296	0.98864083241621	0.988274670293832	0.988078328059729	0.711099234261426
ENT4	4	89.15	73.03	71.66	72.62	84.89	3005.32967509949	21.7493711423653	28.0782561635403	54.8040037221504	306.494785509972	0.971101051598653	0.510655315596964	0.575131227150825	2221.65870948997	4.2783706587187	6.21256217528532	3.10201621463635	0.988544360152015	0.517271736612156	0.524268017917489	0.582398293828322	0.982354551544172	0.987209003417573	0.986995924063243	0.987522170386647	0.64497455646387
ENT4	5	87.86	71.1	73.07	70.89	83.05	3004.66562794247	21.3983192648003	26.9640899764782	53.3692947919725	305.912729152105	0.970945286961709	0.510277766733702	0.575401587346622	2012.51525139696	6.95387787412116	9.61887127903863	4.92876130793491	0.988705220159765	0.51696626230954	0.524187239034107	0.582518231168951	0.982037180712785	0.98706202693778	0.986583403750351	0.987782968083165	0.684162801274445
ENT4	6	96.91	70.85	74	73.45	87.75	2966.79927066149	21.0525934315351	26.9310709858894	52.2406850892214	304.614034436485	0.971670467842434	0.510888362532377	0.575546266628096	2048.5847350156	4.22795741540069	10.9382219593129	5.23222937283971	0.989034277952973	0.517544584445724	0.524600335289189	0.58240444634272	0.982443672077294	0.987138843467032	0.987252165174626	0.988224369237409	0.596650851850624
ENT4	7	86.42	71.39	70.18	70.15	80.55	2964.29855375634	21.2414645975411	27.6373241990576	52.3076147224536	304.67604369146	0.971184035445328	0.511585804700131	0.575336281817464	1895.13008987225	3.80094989727412	9.42627721211936	5.31251092393722	0.988473702063602	0.518266605164104	0.525049368036239	0.582292287372373	0.982508723720036	0.987109336396742	0.986974760026281	0.988054099795314	0.673011541099722
ENT4	8	86.3	72.04	71.59	71.08	80.08	2958.57880373795	20.6461598638702	26.68425908484	51.5281255095345	296.124950603039	0.971439490096957	0.511741082247916	0.575516850715295	1979.59052129058	4.74035891925048	8.52423079632534	4.687017967703	0.988388732550433	0.517442374855167	0.525012758075167	0.582005878344526	0.982851643391623	0.988981782543715	0.988838136335266	0.988850580602917	0.661526453048339
ENT4	9	86.35	73.49	70.64	70.95	80.72	2948.80462004638	21.1259550591453	26.7557503074195	52.0401201530044	294.304144577361	0.971133343120811	0.510490279846428	0.575046603687284	2005.4317425043	5.55201847713964	9.02036909243706	5.83055607834213	0.988190793052415	0.517126753730032	0.524933385197454	0.581801437394897	0.982738707897778	0.987166639831076	0.987183656580899	0.988389795429419	0.532315181459288
ENT4	10	86	71.58	71.96	71.91	79.19	2950.59317384034	20.7407260782353	26.6918013337018	52.3469621673594	297.692452051029	0.971646930807089	0.511999613899051	0.575624197181423	2026.64486350903	3.67899497586735	9.62933842154936	5.31462729318044	0.98826476761494	0.518050943940791	0.52458714175085	0.582238669750444	0.98318483330337	0.988319044463642	0.98798856304117	0.988639585598367	0.659977719727213
ENT4	11	86.51	70.59	70.68	70.89	80.61	2977.84026566326	21.1593365390899	26.0742232393663	52.4714887164647	301.229516818596	0.970939096277741	0.51157362168707	0.57547118788748	1793.96146136478	5.50843238874327	5.85329109781544	5.29911153129767	0.988105189311436	0.517184142336616	0.525138426639204	0.58214240141607	0.982627261531075	0.989151792968366	0.988965168623064	0.988540237728153	0.717351838854706
ENT4	12	93.68	70.24	70.16	70.82	86.88	3008.84382066904	21.3688054922834	26.2002005390072	52.0843362873625	300.808292935462	0.970724868880107	0.511214303607879	0.57558071576822	1950.45850746909	9.43588927967831	7.59209982536212	5.05794656917533	0.988007828025719	0.517303824564631	0.524907564246154	0.582091756783907	0.982507264967578	0.988228347312381	0.988546897308824	0.988814407797732	0.620267380581906
ENT4	13	87.31	73.31	78.87	72.73	80.58	3042.07862997777	20.8188539940921	26.6306625553152	52.1636698376898	299.012530221366	0.970788957963358	0.513148280513056	0.575398847027991	2353.87054235221	1.64285580809605	6.82394522083762	3.92441854345848	0.988102013192646	0.518956505459472	0.525127442232045	0.582062044708822	0.982478473884141	0.98880787718178	0.988559583467826	0.988552427114253	0.660485483149484
ENT4	14	86.41	71.19	71.25	70.62	80.41	3044.37107984104	20.9594777954576	26.271432565373	52.6386225608953	302.719940100422	0.970616043287621	0.510542001333544	0.57515899424754	2033.92106359539	5.18948300144645	8.03401686746182	4.83992137596737	0.9883352040677	0.516405127571535	0.525622134094416	0.582076598559156	0.982071709368287	0.988646266419616	0.988465802250134	0.988115646070054	0.681248282305642
ENT4	15	88.24	71.17	71.59	70.52	82.37	2965.57185519894	20.7217038678657	26.5366885796823	51.9340308291973	298.838032537104	0.971429832670246	0.511375404572311	0.575339697543717	2065.70248070241	5.67701008598058	8.01513149350729	4.6581064344694	0.988559356707179	0.517199594992914	0.525398995690161	0.581998884095259	0.982672235186777	0.988738988821746	0.988901339860358	0.988558076770381	0.678616424946792
ENT4	16	93.63	71.4	71.05	72.04	88.33	2970.95378890704	20.7254007137985	26.6090173122468	52.5376355922076	304.806531279228	0.970323579797412	0.511166696908513	0.575250351789627	1993.46726365009	4.13696334786883	7.39812216484222	5.47243696507793	0.987809607635214	0.517009873900261	0.525145512893877	0.582067104332576	0.982298180031208	0.988698132691999	0.98838126735463	0.988288717070233	0.694539587674147
ENT4	17	92.17	72.2	71.24	71.04	81.96	3049.29144796395	20.7052393893547	26.1034542131294	51.2510210668139	301.718909717582	0.970257276387069	0.511990880544061	0.575703404472514	2009.81137232817	2.40830169742285	8.38718914174499	5.6020500622216	0.988244593776092	0.517830782580788	0.525479878679492	0.582175137251369	0.981798719160919	0.988722373730619	0.989175385248539	0.988883529431692	0.681413068085232
ENT4	18	85.65	71.18	70.56	70.25	78.9	3023.61712504636	20.6546688471542	26.1493039240599	52.1011513080358	302.37210987946	0.969789478404586	0.511352108470339	0.575235250590238	2089.55291462413	5.23307645936317	8.07140013776326	6.54136597818546	0.987234776528662	0.517130621077114	0.525373893072427	0.581988361962872	0.98232912926202	0.988825816203383	0.988751369209029	0.988396483823392	0.643634522039054
ENT4	19	88.51	73.66	71.88	72.26	80.71	2984.40173603298	20.8300272121101	26.4170300032243	51.1631561006264	295.423749835169	0.971309637690334	0.511597766577412	0.575480332110369	2033.98446079106	5.09549944828233	8.42731089741361	5.79825858327028	0.98818394026778	0.517308532060841	0.525040199575007	0.581905535697596	0.982923925506344	0.988960619959855	0.989051629379929	0.988958339123677	0.625829225147972
ENT4	20	85.58	71.03	69.7	70.97	79.28	2954.70204344333	20.8138538125242	26.4996970726224	52.6110978649063	306.320160903141	0.971315078346348	0.510847352351558	0.575446394381961	2088.11318982479	4.73834615733296	8.17692826269316	5.38708859447754	0.988376589056265	0.517020304698015	0.525122874324339	0.5822865726099	0.982737844158968	0.988060522400446	0.988532541284015	0.988252900633994	0.717059487617824
ENT4	21	88.44	69.99	70.3	70.27	82.93	2917.44171992751	20.9225015279671	26.3917623036888	52.9407329413339	301.328938681835	0.970482378057298	0.504904590003414	0.575485403696287	2052.00685282531	7.41162016011406	7.51495366477015	7.39576382533228	0.986848783641624	0.510813560416414	0.525110319831399	0.582311009712309	0.983415487908966	0.98843223659101	0.988634563445968	0.988278418401545	0.702812427255708
ENT4	22	91.02	70.9	71.17	71.76	82.1	2921.4685766305	20.836882947947	26.2619094577575	51.5971250800691	299.265735412717	0.970282043908026	0.49761720408545	0.57558078297177	2088.32564385095	7.30843693108871	7.59721128963976	5.55738751096111	0.986095779079588	0.503688571297052	0.525286716298831	0.58225930963063	0.983963286825624	0.987946188264768	0.988616576623172	0.988529978742466	0.719074963453984
ENT4	23	86.31	71.84	70.95	71.61	80.94	2983.00717650667	22.2104478792769	29.0443223630793	52.5188111370932	304.010723000012	0.970677675925568	0.501690689396313	0.575653052938428	2081.97057228878	5.34367865288433	13.2034156142984	6.57177306329802	0.987474080246827	0.508788835173685	0.524567047829831	0.5830233622231	0.982990536503945	0.986048935655302	0.985685315817089	0.98735846663748	0.659880523467767
ENT4	24	86.96	70.13	69.13	69.16	80.75	2979.33283801002	21.6102531709427	26.9445802334338	55.507193703044	306.811978232717	0.972010359947673	0.506779165976436	0.574686277364275	2216.02047320675	2.55877757577122	5.19799582302156	3.44628026436895	0.988673603903692	0.512988794731151	0.525621793902253	0.582382003762876	0.983145859371359	0.98789519611638	0.987699849735022	0.986785775747058	0.708232230895546
GNL1	1	85.47	68.75	64.51	67.04	79.1	3073.60838400184	24.0362712272209	30.4283681636029	65.1799913014286	340.422406272737	0.972213815521786	0.509294967451788	0.569266443914802	1617.7333063102	5.06985156198563	6.72977304089063	5.35734750912157	0.993516271105084	0.517767013915504	0.527983982193809	0.582212946184023	0.978558523697248	0.983637338347132	0.980950289629728	0.97776328686252	0.704427297104285
GNL1	2	85.33	70.25	71.81	73.9	80.04	3063.79978526448	23.743044745506	29.8043959540318	65.473832352041	341.202586338006	0.972336432221508	0.508580919700039	0.569170569683823	1556.55088746697	2.63816246652117	5.49899198479579	5.96840842562889	0.993557701741814	0.516898637748701	0.528842884258593	0.582209313976896	0.978641130270439	0.983908415613381	0.981722896983901	0.97760471366559	0.744609734575644
GNL1	3	90.75	68.57	68.6	69.42	84.53	2963.61022910517	22.9615094731971	28.4494251518174	60.56342127126	326.280005204904	0.973098382411269	0.508955174864756	0.571019423760426	1478.54030706802	4.79704666321556	5.75135527975676	6.96815231833293	0.993678262918942	0.516778164842837	0.528840607515309	0.582316755229633	0.979289191204386	0.984861995900193	0.983779794099192	0.980599336413132	0.69336510655319
GNL1	4	84.13	67.22	65.67	67.22	77.61	3126.15172953146	23.3903642937195	29.3156291966198	64.011723254223	346.4059504206	0.971679835417658	0.508613414615461	0.569806880155502	1663.09162262934	4.69564055714309	6.62834162123563	6.37589326040819	0.993485371804889	0.516674313030598	0.529535762664772	0.582236258823126	0.97805147714695	0.98439849202517	0.98268060170688	0.978652345196178	0.762263459638863
GNL1	5	86.92	69.65	68.25	70.28	81.08	3134.11901438869	23.3520123933034	29.5818217523493	65.0120073563595	348.182781036491	0.971914677940736	0.50830536258002	0.569242577790093	1495.29380042839	3.46888584400261	7.27650914039987	8.16843264145184	0.99367889981224	0.516364720014775	0.529168173354186	0.582331361915393	0.978097329151685	0.984392122229955	0.981564098229974	0.977523477213647	0.747357535811896
GNL1	6	84.04	68.99	66.06	67.84	79.25	3103.49426425071	23.6929238483647	29.8864986014255	63.7937474511343	344.011201009853	0.97185179878957	0.507472949870709	0.570032647029493	1672.16431292302	3.39698856643542	7.67003343707145	6.80510616989252	0.993363166820564	0.515840345423125	0.528555442312405	0.582562726509274	0.978344910754196	0.983779098268181	0.981686094594797	0.978491450088368	0.728614602641797
GNL1	7	85.76	71.66	69.47	71.53	80.72	3081.84900182263	22.8104344971565	29.1184231089207	63.8143889948861	340.681084465957	0.972272742149266	0.509793541646134	0.570156686656054	1719.17559629609	3.37182508587857	6.39963146176053	6.37637421201787	0.99335854830415	0.517162432889058	0.52843477957815	0.582543327424438	0.978773217192441	0.985751302155187	0.982391725075278	0.978736962239103	0.726780237125034
GNL1	8	84.69	69.83	67.09	68.11	77.78	3089.46667154865	23.3404185573908	29.5227595327148	65.6712289271569	352.163303144462	0.971703327040098	0.50848383745593	0.56928516488224	1742.01048961511	3.49894398901	5.38220047316314	16.4869592900103	0.99335455176932	0.516611670642015	0.52886357960174	0.582365074535755	0.978203930620081	0.984267035283999	0.981696055577431	0.977540017034946	0.764646374599463
GNL1	9	85.48	68.72	65.82	68.96	82.2	3001.52260371262	23.0855342353885	29.5103449534947	64.2245952157735	338.330819999275	0.972133454521484	0.509028730985564	0.569807026162745	1732.42952063603	4.06123933235597	6.05711891048534	6.06466290943645	0.993228066060409	0.516669307357805	0.528796990017965	0.582274502821695	0.978761563169881	0.985211863249021	0.98227782116066	0.978588317711779	0.735793339324557
GNL1	10	83.17	69.38	64.67	65.59	77.97	3095.00320450132	23.1975069666034	30.6111542956519	66.1332281829713	346.907272810917	0.971573817597333	0.508568754371422	0.569485571487688	1811.02555194159	3.14894247389257	4.90872392951305	4.15152124254159	0.99292272708497	0.516873078129475	0.527993637557296	0.582727461335251	0.978498921511936	0.983933533957493	0.980623452653341	0.977276015416847	0.688159206821078
GNL1	11	86.96	70.48	69.69	73.44	82.15	3123.73418440118	23.7807580746318	30.1384609534339	64.6204655491411	350.644922304713	0.971323325179916	0.50779768373071	0.569599565291607	1859.41677860169	4.73071572955457	6.79252487815541	4.77561727915062	0.992933895095393	0.516441860479488	0.528246542632566	0.582516817763428	0.978235640839513	0.98326205249754	0.980230185456998	0.977825099502848	0.681809811675449
GNL1	12	84.65	68.29	65.99	69.05	78.91	3083.43780588259	22.9859715040157	29.6275688032809	63.6673493311235	342.605071157452	0.971927810797745	0.509308112744586	0.570410644463641	1691.59030665501	3.53715527359451	6.5429710358933	5.91032310273911	0.993139881667312	0.517046598592673	0.527735389580193	0.582520440834755	0.97864140665265	0.985033291256242	0.982272212357647	0.979211379511831	0.713400454831001
GNL1	13	85.49	70.81	68.69	67.43	79.35	3117.52257192006	23.6741069364511	30.0961956148004	65.211702399552	341.280280968884	0.97142128629624	0.508475513695822	0.56946020102297	1694.12342922515	3.4345582429902	5.90037468716398	4.958435777082	0.992905550982896	0.51657158303916	0.528279502588567	0.582121965577068	0.978362227237638	0.984327304077189	0.981809668013391	0.978248949012693	0.705678161718826
GNL1	14	83.85	66.71	66.86	67.48	77.7	3051.12051480773	23.1166602250327	28.9133359262996	62.6964780030576	337.096413947495	0.971285491126081	0.507676226052142	0.570370593657025	1862.4680902968	5.66319964342934	7.56983110668756	4.62850507984986	0.99250566753033	0.515535344065048	0.528568096532469	0.582501461126753	0.978619591707671	0.984755423457612	0.982335149863016	0.97917452868485	0.769223110750337
GNL1	15	83.17	68.92	63.9	64.99	76.78	3073.40796160698	22.946075411343	28.4709879243818	61.3773961985205	340.732540860333	0.971800718434823	0.508750021766964	0.57100862081366	1757.97683871561	3.02856899311973	5.92293422786897	5.84438651951389	0.993009276015392	0.516413886791202	0.528502676558567	0.582348264475688	0.978642135483697	0.985159452097892	0.982999308354032	0.98052772824482	0.750416561561018
GNL1	16	81.97	65.48	62.78	64.04	74.95	3109.41289155878	22.9691517903977	28.2635713915877	62.327982641739	334.606815982097	0.972166178300026	0.508880685343481	0.570920801134565	1787.67483599214	4.22064193003307	6.02002219633449	5.07527137186171	0.993470793746231	0.516014610569583	0.528755614308389	0.582339216933627	0.978555368129275	0.98617495497225	0.983846181566386	0.980392157239233	0.733170295916653
GNL1	17	86.62	66.36	63.62	66.7	79.68	3151.86964895444	24.5485733817117	29.8213866513161	62.9161411014944	338.758378975229	0.971304246782221	0.508890079311931	0.570521650504791	1582.74060598371	5.46051753476577	5.39724275773208	5.76038925048333	0.993305721148442	0.517048787502392	0.528410683258412	0.582361066749801	0.977850249024255	0.984220622139214	0.981795137649978	0.979669972941208	0.66744104471094
GNL1	18	81.8	65.94	63.17	65.1	74.21	3075.03264487427	23.1938952086615	27.8599260333113	60.2631280081647	346.116884533791	0.971724986200223	0.509667705689417	0.571218740100412	1756.98874381167	5.29321764017216	5.37538730163184	6.36914921687014	0.99310324456596	0.51690562898307	0.528988790392571	0.582340853597305	0.978473277091064	0.985997592427283	0.984274653186979	0.980901024841057	0.748822783963858
GNL1	19	85.99	68.47	65.69	68	80.98	3127.2129608873	22.8636183060564	28.3338585425677	61.021446122462	335.345141813858	0.971835074247842	0.509059641927992	0.571064288433725	1581.0589856372	5.80827646326404	6.15977832937451	4.94589053031175	0.993636017378403	0.516331950334013	0.52851352734174	0.582385782746419	0.978059427447003	0.985915439861282	0.983562285885368	0.980560146473179	0.707709055363304
GNL1	20	84.68	68.41	67.59	66.82	80.06	3109.95812735862	23.4062156790408	28.8868948106563	62.119255642046	340.594682993761	0.971594806193298	0.510027913079679	0.570888188093334	1605.07722235727	3.03086338529837	4.28122840293144	5.16517079855219	0.993660981931499	0.5172018364186	0.528326536383303	0.582335151246674	0.977793054030049	0.986129354472914	0.98352769895947	0.980342998136323	0.761578502861367
GNL1	21	83.71	72.17	66.92	66.76	75.32	3120.65158967164	23.8383764614971	28.3724521413692	62.6359329413997	347.215129929699	0.971488993319927	0.509450006853922	0.57050952051868	1463.44140625962	5.50453666783399	5.43128959290066	5.83475696047132	0.993584629736762	0.5170232021437	0.528552082479179	0.58223356970082	0.977761696633041	0.985352310576435	0.983831434634792	0.979863666761495	0.767250477328498
GNL1	22	82.37	66.77	64.32	66.21	77.98	3118.36735432477	23.1599519042157	28.6162546789176	64.6367060517971	345.260249736555	0.971478550459883	0.50853477620042	0.569544254196292	1669.36394271876	4.8036072048655	4.82282468245608	10.3200328714234	0.993735660406279	0.516057171633987	0.528874720703815	0.582142229814454	0.977602585040275	0.985423329338204	0.983498040749623	0.978359282366137	0.753745082754277
GNL1	23	83.33	67.38	63.44	63.88	76.75	3253.5243326452	24.0364351490352	30.5387772957185	68.0356254757606	361.667091501147	0.970395001239577	0.50962221888129	0.568211265592946	1824.90555616786	1.90154466727372	2.26298733984041	4.52897490940972	0.993534353505944	0.517397135177304	0.528215322630491	0.582085108921069	0.976710063235645	0.984973020205553	0.98160428395158	0.976165266701566	0.695412884750867
GNL1	24	85.45	67.77	66.08	67.07	78.48	3076.31860717859	23.3408396936195	28.9468328238127	63.2516907243723	345.9938684393	0.971259654683129	0.509363943872613	0.56998099392851	1800.98886743794	5.34912560293034	5.42333516150436	7.06798502103125	0.993363187287613	0.516916218814955	0.52843374960505	0.582286435228627	0.977748790284007	0.985389750471254	0.983205604555334	0.97886703080197	0.733465023881829
GNL2	1	82.52	70.45	66.4	67.11	75.67	2930.28775144379	26.8860600035022	34.8097301752981	68.3997409178916	325.111354485339	0.974399790593601	0.502418001727194	0.567745420146847	1555.35002315919	8.62904562925165	4.85719891054989	10.3124596672275	0.994387754831152	0.51343021569133	0.5284988408616	0.582052408723843	0.979899225286674	0.978551683115672	0.975291804360158	0.97541975883518	0.55424696434704
GNL2	2	83.98	70.32	67.64	69.06	76.13	3028.05673701407	25.005084778095	31.7631867870971	67.3253683220345	334.831275797753	0.973633137881487	0.503457252119947	0.569360729414706	1772.62862930261	5.25491288299557	6.81504778062837	3.47293472830172	0.994383263184386	0.5135033432762	0.529294338646644	0.581979304600376	0.979132668387389	0.980436171861788	0.980423495012341	0.978317828338699	0.455067354796638
GNL2	3	83.13	66.02	64.97	63.58	76.32	3096.60969543222	24.0324984002432	31.8660455661228	67.5047458275895	339.031452224706	0.973711051420291	0.505346832014506	0.569107739318027	1421.23035708899	4.03575203049675	5.58088815937537	5.16802098848955	0.994597136550693	0.514147899319555	0.528669226667681	0.582081664391368	0.979000457207392	0.982882226463053	0.980132919780035	0.977711160019262	0.681039561669492
GNL2	4	83.08	67.24	64.57	66.41	76.6	2965.40494757433	23.9859562330014	32.1400395014373	64.9944761317374	318.938835731517	0.974954463831081	0.504710847244749	0.569797499957002	1489.95111739705	4.17769841271536	7.11727590869385	6.44085964070982	0.994786167124765	0.513725377243847	0.528806045578963	0.582014564828224	0.980064355588092	0.982452628586382	0.980268984588467	0.979009004912398	0.578442431342428
GNL2	5	84.05	69.56	69.88	70.57	77.71	2971.54935134687	24.1345932795577	31.6612301659589	66.0385143547113	324.298258848915	0.974528184873435	0.504713713794638	0.569022780292755	1812.02658142397	4.44554194177238	6.0242391069634	5.94860031548074	0.994364786357129	0.513419831124599	0.529101197958791	0.581811905390561	0.980050981535292	0.98304288848584	0.980022268731035	0.978018454109802	0.597760933465846
GNL2	6	85.07	71.77	70.32	66.98	77.24	3164.74698021035	24.0839938444865	33.7167809874947	69.825208041599	348.323614385258	0.973620076393025	0.505498504735207	0.568570655468385	1523.98569069877	4.04491380109622	5.65544024814049	4.40332215477184	0.994724687585755	0.514841792992014	0.528573709170733	0.582042155969352	0.978783464956568	0.981852117710748	0.978007120320633	0.976854768399841	0.646445681145764
GNL2	7	83.09	67.53	63.85	66.09	77.82	2963.35921638287	23.544367560755	31.1895102745396	63.2238080831673	330.364431777021	0.974907542935156	0.505546473984543	0.571046875317224	1483.42944345126	3.93487653099728	9.5153883314643	4.38156155983827	0.994444018420112	0.514023131172422	0.528495568268831	0.582499347542217	0.980354373777627	0.983509191174831	0.980850926734932	0.980339081454228	0.60822529639747
GNL2	8	82.35	68.92	65.47	65.87	76.13	3146.48384381162	24.4199802053943	32.7970586749235	68.3022332607042	345.452741627916	0.973700636206742	0.504182367608118	0.569033628932956	1435.85537204238	3.90091265861291	3.17959396202545	6.47855147793141	0.994918474750156	0.512941313687243	0.529566738815851	0.582045234010088	0.978673791791089	0.982924077578852	0.979951138366168	0.977645027711185	0.695236233507059
GNL2	9	83.1	70.94	67.04	66.87	77.17	2992.80364599695	23.9717534298393	32.1859080508346	62.3132769334944	321.997169912872	0.974928135835785	0.504385365038374	0.570662300093389	1470.41585892826	5.95610781279682	9.73816629804341	6.46700717600045	0.994839873683791	0.513225491220234	0.528893013554315	0.582251328645989	0.979984982131572	0.98277535638216	0.980043749008146	0.980096174997918	0.57470572514558
GNL2	10	82.55	68.53	67.53	64.62	76.41	2942.96322355771	24.3414819420684	33.3608781338319	62.1735476730116	324.152315921955	0.974790723489514	0.50279404342633	0.571565708164901	1528.38040419296	5.60578535740019	8.62815411305139	6.78065413924088	0.994392709446435	0.512213466459646	0.528233578386437	0.582892420305964	0.980287480217113	0.981610356521039	0.978958414190528	0.980568091561189	0.521074779317655
GNL2	11	81.78	68.14	64.64	63.86	74.72	2906.78824924134	23.9796744231023	31.4313681847119	63.5388050986437	317.418919642512	0.975296168091628	0.503396284775599	0.570054444094287	1522.25281628242	5.50567364961402	7.44775046476694	6.3291157216152	0.994634208134169	0.512400550560758	0.528894936529789	0.582275128969093	0.98055763628036	0.982427290963477	0.979636498732384	0.979012181240777	0.539173341679573
GNL2	12	82.02	69.8	67.98	65.16	75.17	2903.3472764916	23.8553854329589	32.0274227875361	62.278609199493	317.425175943012	0.974676633824603	0.503576464259067	0.57110549835448	1501.13208689099	3.89818612118099	9.01966636698845	3.69387046936592	0.994265106172867	0.512747311978666	0.528511770318893	0.582671697402886	0.980298541881185	0.982114293911734	0.979271741068579	0.980149715354358	0.597584360335213
GNL2	13	83.74	69.98	66.87	65.91	78.57	2951.06277777031	23.9929744600958	31.6816564910962	62.8577173794271	322.778441520895	0.97456500241293	0.502212467661638	0.570741995154825	1564.36544418894	3.39845429503889	8.8176451626651	3.65364962138592	0.994437688469094	0.511462002180663	0.52911153072125	0.582521019616366	0.980016157586749	0.981915500116159	0.979944740759543	0.979779228448617	0.592612848148363
GNL2	14	90.23	67.77	64.91	65.29	77.24	2998.82271312673	23.9067099205863	31.6851628995782	63.717246891451	330.311593097245	0.973665714035464	0.503313491305941	0.570058499357654	1558.51370352761	5.48138875483553	7.45355456085609	6.57692102798047	0.994267724149635	0.512349074792403	0.529081238310082	0.582224462194516	0.979279212616712	0.982364399720791	0.980351856139869	0.979104342694558	0.669871242201019
GNL2	15	85.06	70.95	69.79	69.54	77.9	3012.56269065728	24.3678045800327	32.5476495061288	64.9956972132017	333.227046804779	0.974415583183922	0.503601200854509	0.569206599033628	1572.02386190254	4.86260138258551	4.93707187417994	2.79071431605369	0.994783139055791	0.512837214467671	0.529039423027614	0.581973044809574	0.979525632198389	0.981990359996107	0.978807100061852	0.978063510174903	0.590325666491233
GNL2	16	83.23	73	68.69	67.49	75.07	3032.31353760675	24.0521322351272	31.8190084883639	65.5234579699742	342.711649746893	0.974124783766955	0.503538501799548	0.569511677622407	1449.76101325389	5.44164364959167	7.30823332605621	4.90705204747036	0.994532515832508	0.512567571300077	0.529164878179249	0.582041385295405	0.979480075572522	0.982384625937948	0.98004321238928	0.978472823428803	0.639169682202333
GNL2	17	82.35	70.3	70.32	72.3	75.24	2989.202762644	24.0468637501923	31.4785928192663	61.9591519569757	333.193073563109	0.973964452044829	0.502802020806907	0.570879799736627	1592.64212794891	5.11622299636034	8.80898026264206	5.69078408027325	0.994214847758104	0.511971021875592	0.528990401425897	0.582570178553423	0.979631770980951	0.982090781163561	0.980880039605132	0.979933097767166	0.651511513308563
GNL2	18	81.34	68.46	65.13	65.68	74.82	2972.73937745765	25.5187225213567	33.3673145846364	66.3513610953463	341.00463035215	0.973859478549547	0.501707970131423	0.569086657758641	1727.23538843391	8.60224286625825	9.30114857738805	5.53210217897073	0.994133858841561	0.512100308115885	0.528432415255786	0.582622397456368	0.979605985540378	0.979706440672341	0.976518288398583	0.976767560332694	0.585082408725347
GNL2	19	81.95	74.8	67.36	64.77	73.71	2974.35606133453	25.2402071528023	31.3382438888269	62.4036666137504	330.528165210588	0.973721875989208	0.502643067692991	0.570591882847804	1514.52696426479	7.09403854893	9.17018739210583	4.53477383495219	0.994218097207706	0.512387025991836	0.528802933842273	0.58255635863983	0.979384582441154	0.980983206434661	0.980246333455067	0.97946211449831	0.490031404170498
GNL2	20	85.36	66.61	63.09	64.45	78.01	3028.5300681758	24.1809232947664	30.3550708798078	62.4402963875883	329.358010720961	0.974208219673429	0.504607637368803	0.570389344025255	1447.97452038398	7.0172314516059	6.37451019787826	4.88698571433717	0.994574722314928	0.513462186884675	0.529395666225113	0.582112546696688	0.979522400695953	0.982755206240999	0.981142657761067	0.979860934559892	0.596247511622351
GNL2	21	82.32	70.19	68.6	66.85	74.41	3067.87348410814	24.9328261829867	32.1856974015588	64.6804885987793	331.351171000072	0.973949524225247	0.503737193848701	0.568990709361306	1417.09176005852	5.46779081028634	5.88368559957716	7.70130216969704	0.994537815923009	0.513202649933791	0.529296674402428	0.581815617575713	0.979298633628471	0.981556104423252	0.978860503839778	0.977957091856961	0.613449574166152
GNL2	22	83.54	68.49	71.92	70.74	76.59	2973.10455632044	23.9712369225538	31.6755066527515	62.6656866547741	336.40990563621	0.974182656954678	0.503732282975312	0.570885173708991	1789.50664283943	4.44406948823021	9.67480633623881	10.5049670943515	0.994259386107843	0.51287768296998	0.528845641599761	0.582483616329024	0.979807352654967	0.982168457902655	0.980723078153232	0.980087950467808	0.714131486250568
GNL2	23	83.53	68.97	65.52	65.28	76.53	2994.49641642336	23.726852932966	30.5063673674973	62.0228747840619	332.234274838905	0.973838548014173	0.502447920493982	0.570722241725476	1606.96368200053	4.72822528130587	10.0111371480995	5.64066082893664	0.994431370001156	0.511581695175962	0.529263825267161	0.582604469627509	0.979291862054835	0.982146009585352	0.980811342257701	0.979604983275137	0.674765318858316
GNL2	24	84.12	69.33	65.82	64.05	77.16	2943.53283630911	23.7391051346558	30.6999161073569	61.5640423698327	330.084317252536	0.974668889588372	0.502442796071637	0.571584090266839	1536.4743786524	6.99921956488998	9.27237709645048	3.78107916191084	0.994571201687466	0.511300575546728	0.529360345984018	0.582440178411854	0.979989052502902	0.982675983758438	0.982183305763787	0.981361024621246	0.613243499103769
RCOPAFR	1	94.09	70.29	71.74	75.4	88.74	2871.85526049798	28.4391214959853	33.3873898476604	65.2386361565919	289.693696318141	0.970605218902896	0.508813180404391	0.564753563590517	1681.74595023764	6.38709462623703	2.1314839051426	14.0402314308064	0.98834017920348	0.52044356037553	0.531220372171414	0.577304858265203	0.982055813702852	0.97765294672347	0.978155036324922	0.978258809890493	0.915946609900812
RCOPAFR	2	94.16	67.04	67.94	73.38	89.12	2815.29520386511	27.6161080549876	32.409633340757	62.2386001507435	286.806825712717	0.970391838444349	0.508433104903932	0.565488591406547	2067.41414081791	5.26013737136005	3.52691375735805	17.636526850277	0.987916869010898	0.520248466593771	0.530637939328321	0.577652687533167	0.982260622207924	0.977289002373812	0.979098245115116	0.978942197640305	0.943471886750385
RCOPAFR	3	94.86	73.25	69.01	73.27	88.94	2798.799066413	29.7567245502975	35.0918740038901	65.5141827632307	289.496361630874	0.970485632132932	0.508822306735338	0.565076547026908	1800.93912032077	5.56265562669896	4.1474408900849	15.5949300554742	0.987924846300172	0.522135047770623	0.530989579418703	0.577841509157516	0.982347630761033	0.97450326100091	0.975840986496913	0.977909233019241	0.914155095974538
RCOPAFR	4	94.26	69.15	66.2	74.23	88.1	2777.40161860587	27.8611847419312	32.9393224687317	63.3896152971146	283.960892999927	0.970364528118992	0.508900396456668	0.565159915151113	2227.42250566954	6.79119408510674	4.9076677137993	21.994937956543	0.987857529288546	0.520895285059091	0.531682017833751	0.57731498584389	0.982291979712751	0.976972552936311	0.97821597150404	0.9789455132972	0.930431046847661
RCOPAFR	5	94	66.98	66.32	72.53	88.56	2783.41282487161	27.1187415745526	32.9696768721707	62.7606461119359	284.523530488782	0.970458576985776	0.510409178106603	0.565582210023278	1770.29217025543	5.06561220845164	2.38919740316185	16.1461042418902	0.987813479125132	0.52212589716815	0.530576195352982	0.577891637896047	0.982430992787498	0.977559590272969	0.977805223542891	0.978699418601064	0.929816526437147
RCOPAFR	6	94.37	70.5	66.93	75.76	89.55	2746.11438148517	27.3648149546213	32.0851391364946	61.729968556372	285.638373293593	0.970432863497883	0.507604228607601	0.565975383270727	2042.80730756177	7.7641038806544	3.28095033742914	18.6674419239454	0.987482009832662	0.519441168493523	0.530610238671277	0.577673707449489	0.982734727149441	0.977212164526253	0.979790655622989	0.979749252860388	0.941537146586535
RCOPAFR	7	98.94	65.05	65.67	74.57	94.16	2802.70458286746	27.0420658027979	32.3418909918808	63.6530207710282	288.003280851548	0.970366328529167	0.511542321073256	0.565188261700993	1969.20506287931	6.23950550088429	3.21288603111316	15.9922390438209	0.987850639369721	0.52216948668591	0.531306837252608	0.577480087387052	0.982300653414863	0.979648053201841	0.979652417347822	0.97871471942578	0.946178001816828
RCOPAFR	8	95.35	71.82	72.13	77.44	89.98	2891.33114467983	27.9311189239538	33.9513982444253	67.7595353428729	301.22686685644	0.969635914772439	0.508827153402961	0.564027219013148	1791.32449020387	2.70819172054139	1.92986505809307	16.913704159641	0.987618433413004	0.520597306198454	0.531438681721636	0.577229544329952	0.981792038268848	0.977391060892262	0.977811576539796	0.977128119226591	0.940669585327132
RCOPAFR	9	96.2	73.09	68.33	73.74	90.11	2764.23587405499	27.5337825008993	32.0578900824257	62.3150047925946	281.987992728588	0.970080585857563	0.508464203345729	0.565099265543042	2090.4098615	4.30147349421034	5.14174993265399	19.3088543283252	0.987724099109501	0.520123502984731	0.531254738046789	0.577571109927998	0.982137204845112	0.9775835939501	0.978198700150159	0.978406391575731	0.929672119893931
RCOPAFR	10	94.18	68.74	66.89	73.89	89.31	2805.05018041363	28.0427444456137	33.9222292354248	64.7916669688406	287.60180307684	0.970243713996928	0.509644903835381	0.564848646145234	1738.3521551265	2.67706975692942	2.36071021111869	9.65271786618039	0.987744870757286	0.520630560895376	0.53119950014286	0.577302584365558	0.982281703222675	0.978899323464413	0.978082908910155	0.978427364509359	0.925022178504339
RCOPAFR	11	97.38	67.07	68.11	76.08	91.86	2743.92225037427	27.9699306451159	33.2605367914913	62.5393741359075	278.634121274331	0.970727290273447	0.506313183644895	0.56564269913525	2021.31350650629	4.99014913679455	5.21167300558414	19.1382733468537	0.98783587111663	0.517568290887146	0.531337960772628	0.577625523734714	0.982680745513074	0.97825387018405	0.979061420974413	0.979255029241113	0.944171939179362
RCOPAFR	12	94.24	70.4	71.7	72.87	88.34	2770.38701400107	27.5295635850714	32.9100942973897	62.2441611931616	283.451556039814	0.970349073891601	0.503981588913797	0.565353262297594	1828.93982227521	3.16207103981773	3.23953320032793	16.1907690698929	0.987378651849724	0.515375651155896	0.531272055678947	0.577333219676735	0.982752738347927	0.977891733502459	0.979415749697863	0.979249492371409	0.946895459237362
RCOPAFR	13	95.66	68.77	67.64	74.53	91.13	2849.63176774084	27.6819488581112	33.0664739833083	63.3162488614515	284.574539936949	0.970505697020773	0.504680345253182	0.564899134003363	1988.26718186171	7.08918853111052	2.57480300287019	19.2721495801164	0.987888564715029	0.515879740665779	0.53154542724421	0.577250260547472	0.982404019729421	0.978290685735897	0.978777360344992	0.978603514994702	0.94369194768898
RCOPAFR	14	94.3	69.29	67.06	72.56	89.1	2834.96378285465	28.3755375653282	32.5366272001275	64.8213304761068	291.415060347546	0.96968732282412	0.506651233312883	0.564457188792143	2271.61208018829	6.09948915024182	3.92172949878522	23.2358764004051	0.987309134983648	0.517845395992323	0.531398795433459	0.577056322995849	0.982151677184856	0.978383195513423	0.978922609182717	0.978166543365652	0.947029668095901
RCOPAFR	15	94.71	68.08	66.02	73.67	89.49	2786.10550892473	26.6443326475346	31.5586688105052	63.2587231740054	285.935113497695	0.969995508524217	0.504916909416989	0.565142511548949	2282.64336066644	6.58793866297551	2.82391239634768	22.5592996281386	0.987501963240578	0.515220871119911	0.531206181495154	0.577240522652278	0.982271979835957	0.98000088451284	0.980132611426919	0.979041646196732	0.95308523935454
RCOPAFR	16	96.05	77.2	77.93	81.89	91.05	2766.33964988441	27.8876438629012	32.7238161425349	62.4087700222241	282.394745865342	0.969898513809487	0.48600336969823	0.565064891442744	1756.71034808684	5.42999935350014	2.00523573015594	15.9875892532641	0.986820801302776	0.498052210829432	0.53105212861799	0.577331663088068	0.982851711809329	0.975808076203224	0.978648062235866	0.978752643532989	0.940177825742867
RCOPAFR	17	94.09	72.92	69.92	75.15	88.97	2779.92935288482	27.5246358927862	32.7818081255862	64.6016937642206	286.369194777586	0.9700929455439	0.489987213071668	0.564157566053852	2008.16518704035	7.57019469558765	2.93027161410669	17.6444071756752	0.987139961787556	0.501212292316059	0.531444848832486	0.57738942037036	0.982730902502634	0.97760414216395	0.976453503602136	0.977083310068237	0.900152024523079
RCOPAFR	18	94.76	76.8	73.97	76.22	89.3	2829.44717574997	30.2075700626246	35.6552258014336	66.3365234533617	291.181543393168	0.969647590157437	0.491911636795168	0.565107446401315	1673.56894714617	8.91393135019277	4.41968023528227	16.116703926191	0.987164535061403	0.505918226706429	0.530692586685229	0.578268673688594	0.982255293538401	0.972314518094267	0.972812322405542	0.977240290048347	0.896471310284292
RCOPAFR	19	95.02	67.44	69.46	76.34	89.97	2828.71683538699	27.590739379368	33.2672092149871	64.6935069312236	286.823248707164	0.96969222986718	0.50279351663401	0.564507397313464	2005.93817481195	7.09005513618791	3.29301957294077	19.9420747447237	0.987454482623608	0.514539775316436	0.531096577037447	0.577219707712327	0.982012079474048	0.97717133009746	0.977991680934191	0.977976652167257	0.942606560824793
RCOPAFR	20	97.72	69.53	72.01	78.56	91.99	2775.29201490559	29.479204117778	34.353800525961	63.7935917310226	284.114410222555	0.969809250450732	0.499907845033276	0.565358605001358	1770.03693742915	3.9375908211008	3.70813685947301	13.6251116824857	0.987194560149738	0.51233652651569	0.531100142785125	0.577726836335973	0.982389175952946	0.975741176279311	0.977261674937479	0.978591558230086	0.919651451040102
RCOPAFR	21	96.3	70.1	67.03	75.93	92.08	2786.79489108795	27.283630177909	32.4946413986283	64.0852690406658	281.998978559651	0.970011810940571	0.50323647686053	0.565085615960717	1932.74031000822	7.45341339710721	2.51047973769002	20.4313984165968	0.987580271102905	0.514726208067066	0.531425409304513	0.577404946419516	0.982210600316353	0.977677975151716	0.978625055866452	0.978664314299364	0.941330469983272
RCOPAFR	22	94.33	70.71	68.53	72.69	88.98	2837.13081511684	28.8127626597415	34.5418915278663	67.5681323043251	291.936325618776	0.969046717592707	0.490070217284117	0.564172381636211	1646.5311232493	7.50466707088555	5.20416498269559	23.866063557451	0.986938914942628	0.502445694793207	0.530816164149014	0.577172361360152	0.981871018480448	0.975369522244223	0.976445113994162	0.977476434087547	0.934547200489876
RCOPAFR	23	97.94	71.91	69.24	74.59	93.83	2844.20067785599	27.4824439179227	34.1837453608937	66.4554706749518	292.739192345773	0.96950425632172	0.493148548345227	0.56445462900476	1791.38305234411	1.73534118923871	1.22085349939131	7.42177815905762	0.987128389304164	0.504662466797908	0.530697849944112	0.577546306555524	0.982146058027095	0.977184912272677	0.976752939864795	0.977332246086306	0.92037965635283
RCOPAFR	24	96.13	74.39	67.09	75.06	90.74	2769.64405118229	29.5030346932344	36.4779288764795	65.6507692822684	284.897019971872	0.969673648372698	0.49372292012523	0.565284334023168	1789.04013266983	3.32290812533892	2.48441280911862	9.27870787004895	0.987014001638485	0.505934289766119	0.52992788214413	0.577996770650757	0.982431502251233	0.975863724029194	0.974871045442272	0.978006042121523	0.911646694996738
RIGESFR	1	101.69	72.99	73.71	81.1	98.96	2882.80889754197	30.4855277987849	32.9088996244477	62.4103221480626	295.381232302022	0.968197829729888	0.494457479841014	0.564318542987357	2388.90501998663	9.37206434067203	5.53965017893923	21.6008805259901	0.986041611817937	0.512397552110899	0.530074902888158	0.576372482077493	0.981903621638086	0.964987982093243	0.977669913729848	0.979086546521637	0.930181513668484
RIGESFR	2	96.73	73.74	67.6	75.88	92.03	2788.35818857211	29.5915040573417	31.3444775337467	59.7460790762624	283.305927768779	0.96856285711067	0.494920626569678	0.566027842763805	2386.02740914871	7.11583739971929	3.29652140725524	22.3829673252042	0.986145167634532	0.510716136427272	0.529569982090962	0.577164215593643	0.982170667057026	0.969071841026815	0.980868555569609	0.980705018556315	0.93693480827838
RIGESFR	3	96.7	67.42	67.54	75.28	91.48	2894.92823786993	26.9095773057291	30.0548954252837	60.8369070177995	292.255826950844	0.96771821496462	0.486577696393969	0.564911569727219	2690.07154045304	6.2814668279421	1.91142326301358	25.6898693917634	0.986112329434004	0.502823125594436	0.528959912227058	0.576741521171308	0.981346836541491	0.967691563149047	0.981483162874907	0.979488295865947	0.968187271185991
RIGESFR	4	97.38	71.28	69.22	75.35	91.23	2820.95164247583	28.4418955276134	30.8088304724372	60.1030188222281	288.739258546162	0.968204010281574	0.496798307975661	0.565226152900887	2495.06607285547	8.05228275630504	1.72889202604267	20.3010554401809	0.986051895545406	0.511543087726478	0.529424067461476	0.577004083755658	0.981899649151873	0.971175879208243	0.981323724014712	0.979587785968325	0.958251524893448
RIGESFR	5	95.69	69.31	69.55	77.4	91.46	2812.00584539647	26.79604714249	29.6112371539612	60.5504362074259	287.545488333673	0.968169472129022	0.49538011180041	0.565178855335669	2705.57132139684	7.82787441438258	1.47933388990154	22.4526719888035	0.985901527204906	0.509391128749163	0.529013313056039	0.57725481847366	0.982014375080486	0.972494579983838	0.982480438111065	0.979080359744903	0.965973034568896
RIGESFR	6	96.17	67.76	67.51	74.86	91.46	2841.30822005589	28.2605967184763	29.6382132544272	58.5210599922261	290.947192402863	0.968025284942934	0.497026246818063	0.566869444564617	2378.00142113864	8.08398813898861	1.87646353981378	18.5888696425708	0.985728896765739	0.510593597596565	0.52843574996811	0.577981224781687	0.982040080309209	0.97342827868903	0.983079897001444	0.980774842260201	0.957847035661918
RIGESFR	7	96.35	70.65	68.69	76.9	92.1	2837.09036925683	27.7924518891244	29.9276244690442	63.6093230769131	301.448406268683	0.967140541002447	0.495067955406919	0.563718729240514	2473.75292262983	6.82124317809956	3.50455979539177	29.8768714773495	0.985380111850901	0.509679733085931	0.528818106423566	0.576850866025609	0.981489812277424	0.971331452419064	0.982305744474061	0.977234780151111	0.970671091363248
RIGESFR	8	96.05	67.76	68.27	74.48	90.87	2822.21172835541	26.9082731908139	29.3955024854353	61.1526097614882	296.847139738994	0.967503976658696	0.495636828253698	0.565598943784922	2538.98597114295	7.11500865153325	2.66858430063931	24.2578946651024	0.985447460596374	0.508623666386767	0.528323568065983	0.577349605817183	0.981791536682414	0.974466704970049	0.983154839255406	0.97964723295233	0.967883463875724
RIGESFR	9	99.66	68.43	68.21	77.01	94.4	2849.88453617879	26.3847114994286	29.6765247421939	60.6522690510541	295.079401601699	0.9673620613111	0.501968487680239	0.565867570096217	2661.08837144748	7.22396246972306	1.97827922014308	21.3181991256825	0.985791918426718	0.515873154230065	0.52856824590115	0.577252433544693	0.981304515921543	0.973046345916995	0.982771339027441	0.980277495967291	0.967160069304338
RIGESFR	10	95.89	67.92	66.63	73.54	90.47	2834.45452228037	27.0032253018481	29.4481666100094	58.9801776151067	288.992857725556	0.967913053294159	0.508466131819245	0.566037097973009	2586.37627000228	8.31711187369685	2.20955006379334	22.2771257232832	0.985935436435838	0.519710309259776	0.528660906637637	0.5772707152725	0.981720524006288	0.978364528776529	0.982671201505035	0.980540122680242	0.967053003641868
RIGESFR	11	96.17	72.98	69.79	75.24	90.94	2843.57026342881	29.2392372477416	30.733029407429	60.2966419601104	293.547509019578	0.967215397749805	0.490690005015593	0.566208196244154	2293.11639940586	7.13208762309267	4.50093632837468	19.5788052406313	0.985541634686026	0.507970573787917	0.529116242961655	0.577481275828177	0.981404908436913	0.965981161775842	0.982184595670473	0.980478882942386	0.953994863273576
RIGESFR	12	95.43	68.1	69.43	76.64	91.01	2804.65487193884	26.1410237658912	28.1233118067839	58.2611614790115	288.398508755198	0.967319546978641	0.504814550892455	0.567208944175425	2509.92365337452	6.91817773184991	1.78371704775714	20.9484825407788	0.985228625491259	0.517238776484074	0.528177750061853	0.577759436581895	0.981822413550268	0.975979709649627	0.984927248408055	0.981738952687838	0.968214783648346
RIGESFR	13	95.34	66.32	68.54	74.42	90.22	2786.92504904529	25.375945603675	28.0982744261781	57.254409154609	285.879923503419	0.967702985952133	0.504030862721944	0.567908796738562	2527.2684619545	6.02865508007563	3.16771942608997	18.7350865269321	0.98534277096353	0.516485857670779	0.527741004471311	0.578091580709149	0.982097818615802	0.975885119091151	0.98539525399391	0.982385517605887	0.966676081324731
RIGESFR	14	96.65	67.92	68.98	76.6	92.19	2800.60470458417	27.681508554985	28.6878500509836	57.2563419940214	283.138276604078	0.967390063532408	0.495415390122142	0.567621510877197	2376.36915104554	7.89735776173319	2.69219250036384	17.8031725738013	0.984985958276284	0.510938722604255	0.528389689119105	0.577639965992118	0.982135892805347	0.969618015242628	0.984938357594134	0.982656229304158	0.962087339970553
RIGESFR	15	96.32	65.7	67.17	75.08	91.29	2817.98082349098	29.6177305948137	30.7428667832532	58.7766323594017	286.597920452398	0.967284814875948	0.498325228591352	0.56697331052376	2147.03720495378	7.10969909427128	2.52854099463282	17.7400643332226	0.985286075753484	0.515224142564924	0.528917818914157	0.577554301955488	0.981729914467967	0.967200849926316	0.98263283018549	0.981679659564645	0.944285490670708
RIGESFR	16	97.46	70.01	71.12	76.8	91.89	2804.42795007962	28.0221517356476	30.366982495009	59.0758622788372	282.916144706608	0.968185833116559	0.500293910110903	0.56657563612515	2544.70225007139	6.06234156765149	2.83783190037753	19.8452222367213	0.985848977438946	0.515986290996647	0.528946961633092	0.577167844300564	0.982083316282102	0.969587601144531	0.983084789649056	0.981647958596429	0.962118370763441
RIGESFR	17	96.82	65.86	67.61	78.38	91.86	2837.19089277208	26.54566615074	29.3651168235792	59.4587814745087	286.352017979467	0.967325545947625	0.487451559813291	0.566005075067061	3050.53233838875	6.5404230310012	2.41758785618137	22.070348937253	0.985307708213004	0.503921570255132	0.528447262973802	0.576891657624683	0.981749698986936	0.967316321796858	0.983152287841567	0.981128895844244	0.971438554316919
RIGESFR	18	98.89	65.6	69.28	81.99	95.34	2828.57044065717	31.8220862190013	33.8713011961039	62.3208005070953	286.954244465687	0.967689780184265	0.490859865307053	0.565801969594976	1885.59171579901	4.91651257866459	7.8311629257215	16.0971951199105	0.985672720478389	0.510190793494226	0.529290534124122	0.57738356376197	0.981755668062522	0.962110393927773	0.977544492110003	0.97994124721609	0.909503103259501
RIGESFR	19	97.07	72.35	73.46	76.45	92.13	2796.46393253943	32.6426790085169	32.9850200163895	60.6366126234974	281.5995445003	0.968056505435233	0.489482887201555	0.566395726567119	1981.88575978177	7.33704746720028	5.61831055779419	18.6509474348895	0.985517932729146	0.506558845806173	0.529630114351734	0.577680931439146	0.982281979136029	0.966290276547353	0.978355398501198	0.980464640153669	0.889320921964778
RIGESFR	20	96.61	68.83	68.19	75.25	91.01	2819.03806115988	27.1732656053835	29.457500073748	60.3929073409802	293.496525795456	0.967829360347221	0.507681368797175	0.566140987799558	2439.55582832848	7.27557170082863	1.63947379483599	21.7820543265935	0.985536678613365	0.519350507863656	0.528824391421225	0.577249879019978	0.982032816585722	0.977531283998389	0.983632638522682	0.980755489738206	0.958447767163091
RIGESFR	21	97.31	71.63	67.9	75.15	92.4	2810.35445798513	27.1633728114204	29.7092229882193	60.699730838893	294.862217528417	0.967005756908982	0.493555761142186	0.565680620216642	2718.01357705197	6.87229568264108	3.16394925372452	24.1540346072109	0.98482763811181	0.506435182386938	0.52857097221464	0.57715774096325	0.981903552953695	0.974568470571005	0.982851955837021	0.980114412521865	0.971190976369776
RIGESFR	22	99.18	71.12	72.39	83.42	95.59	2849.76099503194	27.8361926157619	29.8135144065755	60.295238343079	289.547484091964	0.965277040231162	0.478275067626252	0.565196806665002	2613.01873524315	9.71383195240783	2.36461568652366	20.9182758379046	0.984262695309143	0.496506851733229	0.529029640375676	0.577125536128213	0.980710784663014	0.963279894238453	0.982196304884171	0.979330789028609	0.963027991987236
RIGESFR	23	95.43	67.02	67.97	73.26	90.35	2896.79707298579	28.5249328165317	31.3574599201966	62.3346131471649	295.088951131919	0.962093592283018	0.451697143993422	0.565981986446049	1992.71019244556	5.64674984371404	1.49061290124746	13.0168578054588	0.983817359541266	0.476166063890623	0.529004736790337	0.577328599572649	0.977918902276357	0.948612633799914	0.982426247983195	0.980346351912932	0.940243755677314
RIGESFR	24	96.66	72.41	68.74	75.79	90.85	2873.26716164525	27.8449744747972	30.2219408375171	60.6164920211509	286.537544129986	0.967031907745303	0.497840241938079	0.566400251327017	1989.65515622891	4.78853615289215	1.39199636150663	15.7811910888792	0.985490451430138	0.511841417560169	0.529075848569003	0.577699384540287	0.98126968794264	0.97264548131171	0.982804838232367	0.980441154144103	0.959899878360679
RKIOSFR	1	94.12	67.54	66.3	71.59	87.76	2699.32766124415	24.1229094433552	28.8893300866844	55.655555769044	266.858171487744	0.973079724376137	0.513162841312587	0.570272481174201	2451.43801612891	8.40416010194695	5.7351626697077	12.1772114332399	0.98839099524334	0.52130089658418	0.530639349165311	0.580047624737616	0.984508892795575	0.98438894825442	0.983941351058356	0.983147687971593	0.925533598813077
RKIOSFR	2	94.13	72.69	66.02	71.57	88.07	2728.69697839053	23.1861255526689	28.776712122131	58.6011079617991	273.243319690995	0.972652038437502	0.512625282509855	0.569401379265565	2287.97891426454	8.35019633335092	3.70667455041143	14.2722076719611	0.988145320404544	0.520638422227249	0.531361148933316	0.579568565725706	0.984320846694189	0.984609011983567	0.984326382863374	0.982457319010374	0.915752785980175
RKIOSFR	3	94.3	72.49	68.3	71.17	87.97	2698.54641143747	23.0538301167946	27.5312925037348	56.2085887035075	270.474173793316	0.972812641343749	0.513724559254498	0.569847215916653	2566.37453093182	8.3455854378281	3.45601715412939	16.7788625536633	0.988191795130288	0.520625010402337	0.531005943650002	0.579616461574676	0.984437076018718	0.986745832393825	0.985593459757742	0.983145327461056	0.94039234404346
RKIOSFR	4	92.82	70.08	67.4	71.53	86.86	2697.09442549672	22.5834075614062	27.9785940924587	57.7475812011474	272.825507558989	0.972765376626555	0.514452022684649	0.569759231602428	2409.79444633312	6.40243352291832	3.43667013599183	15.6507163596734	0.988330882043454	0.521504121796545	0.530728159585312	0.579673479205439	0.984250714310661	0.986477385667439	0.985410223123974	0.982896841137876	0.93700180979051
RKIOSFR	5	95.94	69.76	68.22	72.15	88.38	2729.64333268182	23.7083488642272	28.3101871746878	57.0840230178168	272.790918058882	0.972660569334465	0.513352797780673	0.569911024140455	2299.72556128775	8.8552563796024	2.98952429087448	13.3227946301434	0.988394726298193	0.521151636607689	0.530688693958885	0.579956692606371	0.984081099842917	0.985035374967292	0.98467489160516	0.982678588601556	0.926235522596333
RKIOSFR	6	94.14	69.9	66.18	73.1	88.34	2774.33251211293	24.689631235016	29.6815816275099	59.207599612289	278.063725270659	0.972646786399835	0.514030489475028	0.569414783077514	1593.42654220664	4.26376149720178	1.48192229762643	5.33612007206899	0.988455295760926	0.521764186720658	0.53074934267923	0.579694732832812	0.984006854504309	0.985177792109042	0.984508960709063	0.982266615214766	0.923204340328245
RKIOSFR	7	93.82	69.56	66.47	71.49	87.89	2716.85894624261	23.5649753655617	27.7957840048947	56.9070523036932	270.359842618914	0.973058525480512	0.514324455507145	0.570415631280493	2243.61850793187	6.90558606924318	3.54235179735216	13.7206222838762	0.988546243132807	0.521627293737103	0.530662906067084	0.579894871465058	0.984332834442612	0.985999892418133	0.985956202866881	0.983653519541196	0.930580642710838
RKIOSFR	8	93.32	68.52	65.55	70.48	87.2	2744.32995427755	23.8695717420692	28.7022111386391	56.748527478821	270.699990978306	0.972858014008494	0.513285933502086	0.570621996408887	2181.54717773557	6.39052598123275	4.45628722423421	12.9832728310923	0.988362020256143	0.521248776608015	0.530148387513565	0.580220834315354	0.984313433812814	0.984723526532289	0.985044944507652	0.98345657835987	0.929159490774892
RKIOSFR	9	94.21	71.75	68.77	73.17	87.74	2760.40642559306	23.8445679859413	28.716644866653	57.5966683493051	274.861786313188	0.973088049273242	0.514088719739821	0.570531389150241	2305.01492591998	7.18803188623381	4.48079454341959	15.9977937018143	0.988872169099313	0.521735283765459	0.530246971200464	0.580234815504997	0.984038260637421	0.985343977561855	0.985142578063659	0.983276725050857	0.930960674413654
RKIOSFR	10	93.95	69.69	68.87	71.8	88.19	2785.38607125068	24.276060730284	29.3923350402194	57.6632719904129	273.723753283641	0.972822004569737	0.512941302259701	0.570527666522637	1958.17533294174	7.38481107550727	3.72262740057293	10.2366973967447	0.988594542772863	0.520849089965281	0.530318247183609	0.580451242989165	0.98404549335374	0.984817506917201	0.984219148214399	0.982903686422612	0.923953102666944
RKIOSFR	11	92.53	71.38	68.47	70.96	86.9	2726.0596359251	23.3688271647295	28.5037552086946	56.2793799756179	271.122865408211	0.972882177671261	0.5108101751739	0.570387326793523	2114.79988746133	11.4841260389044	3.80475323019989	12.9191811069128	0.988403543080557	0.518875366236232	0.531477153996598	0.579787503063559	0.984296529977098	0.984456400154753	0.984853308444741	0.98378685946081	0.902416797782493
RKIOSFR	12	92.56	74	68.26	72.17	87.09	2774.0235165969	22.6978448919273	29.9357167197001	58.3860750524745	272.66028178891	0.973225020245365	0.509161724132629	0.569906991139528	1826.68092437679	9.54719789563054	3.68035593625993	9.2063510910724	0.988932278076252	0.518076609911591	0.531115183157593	0.580341017482587	0.984116953021857	0.982792340730297	0.982326541873215	0.982020870438694	0.864978645253123
RKIOSFR	13	91.24	69.6	66.33	69.71	85.47	2800.96198769131	24.1980745000078	29.413491369126	58.8402660247068	279.035400987403	0.972651871951535	0.513001867579778	0.569052864252082	2421.96803468197	8.5722307811002	4.4175208047655	14.4374878209519	0.98885160053112	0.521481797574503	0.530804638987497	0.579891194044735	0.983617634262933	0.983738780463353	0.982539251286654	0.981309718264462	0.919866224589744
RKIOSFR	14	94.28	69.3	70.33	72.99	89.43	2760.01579702959	23.8000876880705	28.9620445195107	57.3410068990026	272.532885002428	0.972697656343842	0.514029242464515	0.570079977414129	2457.39183534676	7.64460439809864	4.46023833783603	12.5832355097349	0.988839750542535	0.521969009113471	0.530600838336673	0.579903743139053	0.983675722795492	0.984788815982694	0.984265252050132	0.9830596614677	0.932060621812429
RKIOSFR	15	93.55	69.7	68.77	72.7	87.69	2776.89384180174	23.648303585504	28.7087169342241	57.6374338847483	276.691362956881	0.972324160815185	0.512422537375404	0.569642440765414	2318.42266593756	7.91399877174399	3.67025768252649	14.6424773493363	0.988299560020453	0.520994686362364	0.530930405081433	0.579820379712881	0.983835468666062	0.983546571181347	0.983565116774203	0.982446393221799	0.933647790564457
RKIOSFR	16	93.96	69.52	68.26	72.01	87.13	2806.89454366225	25.2525405142738	31.6566810667372	60.9810752946295	280.795046835354	0.972873864112228	0.512006472978825	0.570207677686453	1714.44267139544	3.34052112203385	3.17818695922286	6.91319425552975	0.989061784398164	0.521224589459216	0.529547909678439	0.580954876423947	0.983633054535833	0.982314501911825	0.980765971113749	0.981500802947643	0.786840984132736
RKIOSFR	17	92.7	69.68	67.01	70.81	86.46	2758.43862986023	24.9030721863777	30.8531527965755	57.9140263843035	276.219603582808	0.972739207187574	0.50976126954351	0.571528722906345	1864.37741569413	7.66805687616111	6.1988751957843	9.3203221860098	0.988432884517788	0.52088147564009	0.528853383156579	0.581741397370932	0.984122667733915	0.978651177635153	0.97921225636804	0.982444648926927	0.87500570842882
RKIOSFR	18	93.48	70.28	67.29	70.78	87.09	2737.35374511712	23.2215968786284	28.0921481812965	56.8549713002203	274.043503056541	0.972675989290381	0.514181820546049	0.571239072275209	2091.80498785789	7.86364216889514	4.9731995337539	12.4099803445601	0.988388071638884	0.521808800096614	0.529729513509372	0.580818144801606	0.984103326619017	0.985383574310835	0.985370343826138	0.983507621770892	0.920067282805857
RKIOSFR	19	94.83	69.69	68.2	70.8	87.37	2776.69549516238	23.1022115045168	27.2378621186333	56.3059912486587	273.737711340488	0.971969459117424	0.515041840256605	0.571799323752553	2074.81990674753	7.40559595119833	4.47102812056132	12.1862113478845	0.988136695589833	0.52206728550455	0.529363206302032	0.581065789568779	0.983638664018283	0.986543027224633	0.986467609606462	0.98405263916311	0.922105389310375
RKIOSFR	20	96.28	69.66	68.69	72.49	91.1	2777.91519917606	23.0253556654513	28.1982724155128	57.0854431664008	278.273129890771	0.971945974822627	0.51320017509876	0.571870931017326	1782.07821349902	10.7902567099135	4.11156762471953	9.44880941497339	0.988184634416238	0.522161595010994	0.529293440868267	0.58137609275374	0.983567180638055	0.982837841775695	0.985471357459017	0.983650580313008	0.882473985241419
RKIOSFR	21	92.54	72.21	66.93	69.98	86.67	2752.42085000334	23.1764569751417	27.8442243592166	55.7959724960075	272.530082882853	0.97266805999336	0.514398004931131	0.572118066026412	1898.1949544428	7.34825151589596	4.95003188608851	8.83172193512553	0.988596038866566	0.521716051598665	0.529210775826006	0.58128947628929	0.983888283740781	0.985973123416255	0.98597561043386	0.984222301216557	0.913243557698197
RKIOSFR	22	94.49	68.11	66.71	71.25	87.74	2760.91682119739	24.0848704391242	28.3515116013509	56.2030702572426	273.834501691871	0.971617902075326	0.513349114248699	0.571802539834385	1953.84327709708	6.04772735005981	5.13293190026075	10.1218458508752	0.987888464221078	0.521448059693467	0.529619249043505	0.581188960160955	0.983529960380111	0.98446835635072	0.98543713340213	0.983849623840117	0.9110352537381
RKIOSFR	23	92.33	71.47	69.64	71.3	86.14	2758.21633479615	23.3159603979117	28.0290466692926	56.0711064721677	274.550452876312	0.971940706328054	0.513409580031722	0.572018102407641	1948.49207892629	6.48757064612818	6.22227933788975	10.7254829317318	0.988113925388471	0.521137741323535	0.529256604184968	0.581529813285168	0.983632232433059	0.985170597561816	0.985615337872001	0.983643640170754	0.898586073818385
RKIOSFR	24	92.35	70.61	66.23	70.92	86.65	2766.29685063513	23.1356712234305	27.6724736392104	56.9928813498329	273.578677801678	0.972015851021006	0.514346040725802	0.572021438771089	1793.10512325091	7.23859731328562	3.99187514471977	9.11179456735369	0.987890287018765	0.521624443621915	0.529715108292559	0.581165796503731	0.983930972693674	0.986046660609738	0.986336829062677	0.984265492243944	0.903533522129306
RVARGFR	1	92.39	68.26	66.12	71.18	85.73	2793.67209848036	24.8700769283871	29.0639996929269	57.2561858566053	288.185108440104	0.971204075530922	0.511699125591359	0.569192178594704	2268.3105415208	8.9336491405366	5.99667568667116	16.5510868067169	0.988479067114506	0.521211314064298	0.530779766996155	0.57926568413044	0.982523664730694	0.981749842690934	0.983188311238214	0.982609870027329	0.904389439174106
RVARGFR	2	95.68	72.25	68.41	79.02	91.46	2817.52843946326	24.1524294754421	28.6712699047913	57.7062902759241	293.352520823576	0.970886901590942	0.51199284210923	0.569407840796684	2303.86483810383	8.95420266702191	5.02216597168049	16.3974635942939	0.988419506515007	0.520775978901884	0.530624603494985	0.579317264645789	0.982261980051484	0.983134520122886	0.983722633497447	0.982894651249236	0.918852459427034
RVARGFR	3	92.15	72.36	68.09	72.29	87.75	2879.23003725226	25.1251578441664	30.0351682113545	59.2811012393621	300.984448010547	0.970429771067016	0.511058972442814	0.568659141209364	2480.77247137752	9.23063318954331	6.61366891411929	16.9823870648322	0.988222258228671	0.520998200488698	0.531525798929862	0.578872240676313	0.981995460015698	0.980922720968016	0.983170688352588	0.982356902353761	0.90431786267787
RVARGFR	4	93.17	69.01	65.23	70.61	86.36	2871.48012100419	24.6653235551591	28.9421964753838	59.6240229780225	298.731581148787	0.970553697716055	0.511545336467853	0.56744363089822	2584.43710309616	11.7464618259567	4.26430834671071	19.6525097603398	0.988374129495108	0.520629491842876	0.531711302497176	0.578308479053035	0.981969953232026	0.982551592798042	0.9835269511245	0.981212711643783	0.920289099668978
RVARGFR	5	97.42	78.79	66.61	72.85	92.6	2806.1224192338	24.6502475847966	29.1077366265948	58.9885890192562	293.002012471417	0.970679517160856	0.511308769686872	0.567756164730527	2511.48819993111	8.65032425976676	5.66496816473339	17.3591364388281	0.988161557593605	0.520393052872152	0.53241996057989	0.578121858781842	0.982308520000189	0.982543419564995	0.983121725548286	0.982070053408538	0.924026450527456
RVARGFR	6	94.03	70.53	65.58	71.33	86.76	2815.34008338554	29.078059959179	33.5575453713339	60.9924488927115	296.633674734102	0.970800607083728	0.50421114166528	0.568107977546003	1857.4304410207	14.1914667191837	8.55792037223157	14.4328930387969	0.988473666707458	0.520153915450968	0.531765321781579	0.579259878763392	0.982120859443228	0.969349891806801	0.975835681437265	0.980748017209138	0.714687288246471
RVARGFR	7	94.07	82.91	65.92	72.1	89.26	2810.59072613779	26.3518951706694	29.6191720322675	58.8072375946372	295.331844345307	0.971054058871521	0.508015829648226	0.568538686185989	2342.53695404923	14.7356314524969	5.51170567834975	17.6344842116832	0.988337986010876	0.520100604450569	0.531684690779507	0.578860167544557	0.982512129065164	0.976764543822999	0.982809578887656	0.982169301089846	0.867592199996016
RVARGFR	8	94.35	72.4	66.69	77.53	89.42	2849.22610333085	26.1081045757414	32.3462941443838	61.0802570529311	297.104868830746	0.970720343392726	0.50866272227744	0.56862650111657	1901.759106084	10.4278229395976	5.25876434749865	15.030176059594	0.988403471508374	0.520530526677503	0.529946979775514	0.579547391034425	0.982109403067289	0.977200560213415	0.978165301112486	0.981156174478911	0.892187378456433
RVARGFR	9	92.38	71.06	66.07	71.88	87.17	2867.3309347629	24.6283021149965	29.14425219257	59.0197981246264	297.57119661891	0.970140846865225	0.510808792882175	0.567967526511138	2378.97676958262	9.42637256321332	5.38520981531126	14.9398186191224	0.988465569441155	0.520026897228594	0.530483871189463	0.579291828289168	0.981461445757498	0.982273793152729	0.981713455457003	0.980451473290286	0.932073508451268
RVARGFR	10	93.06	72.61	67.58	71.63	87.9	2847.35281332347	25.8184230646725	30.30091606386	59.4111264619117	294.570588022547	0.970218495464119	0.509609790179173	0.568708977704313	2158.37111015891	8.39628080461342	6.74132746199876	14.1882217745966	0.988348215774455	0.520027886453368	0.530880867470607	0.57934346903832	0.981656545718424	0.97996627383726	0.981122935938857	0.981643891918451	0.89545097789528
RVARGFR	11	91.79	70.74	65.3	70.43	85.11	2848.94841412893	25.3187483455098	29.0181283105908	57.9721120312906	289.415938423545	0.970859148876807	0.50974605671292	0.56931167468799	2443.40559860502	13.166241618313	6.44431327899803	14.7628266123058	0.988638980117343	0.520023848703672	0.531148957318802	0.579392425662311	0.982015850479185	0.980235921840176	0.98305031351148	0.982601168866166	0.881890857198734
RVARGFR	12	93.16	69.97	67.99	77.98	87.21	2929.07287524545	25.0713500123266	29.5814399498451	59.2935842465089	302.52524623071	0.969493587746976	0.5048608450438	0.568823386262856	2440.56153122181	17.7694030912859	7.15070601449311	15.3645877513398	0.98852568154822	0.519737979914515	0.530861137186145	0.579769371632586	0.980746991042826	0.971375701900482	0.980612721972754	0.981120104121909	0.72583630533452
RVARGFR	13	92.58	72.23	70.46	72.66	87.67	2868.48005516688	26.3737291468516	32.7496376225532	60.0926862488383	294.463470890541	0.970621085980614	0.510840903008752	0.570076743179963	1899.3603409774	9.56618556922272	5.81787167210319	11.01002598797	0.988649458113321	0.521036361674793	0.528183086076285	0.580845392487372	0.98176464672614	0.980432347114375	0.977497889451811	0.981460386108439	0.890650539624876
RVARGFR	14	92.34	73.46	68.04	71.07	86.61	2881.22476534818	25.281212314131	29.9117562334046	60.2656927210092	300.053917542692	0.969930717369721	0.509693261586669	0.568370132197195	2279.12316080125	12.3003707494239	4.44043919599763	15.7891288447635	0.988092308137758	0.51975072111784	0.531141846971047	0.57920691141365	0.981619540382552	0.980649455359021	0.982156130255945	0.981290314388677	0.911055577258099
RVARGFR	15	93.53	71.8	66.18	71.4	88.56	2845.42397139193	25.7220866930648	30.026618840393	58.364194483339	292.192175092949	0.970350326177588	0.509306948932441	0.568923336894238	2447.68409958441	11.3598902925421	6.66890619372866	18.2031486551953	0.98847263369168	0.520324262400757	0.530863220414013	0.579445799760869	0.981666353830747	0.978826062391397	0.981653333731799	0.981840470893095	0.893310575845751
RVARGFR	16	91.58	68.8	65.94	69.97	85.83	2830.73835497605	24.996324854856	29.0694665893228	58.8704822764223	291.370274207314	0.970299499441458	0.512210655632716	0.569214376509462	2253.30801892627	9.2071507228176	4.0630874142088	17.1201413981105	0.98847630842016	0.521166877691086	0.530294055618021	0.579400774473549	0.981611285142733	0.982815058972955	0.982790515958525	0.982419081207921	0.910413633585803
RVARGFR	17	91.44	71.93	68.19	71.35	86.33	2887.74856722863	25.3953938414519	29.9239051183288	58.7417772257746	297.449765749387	0.970223248060763	0.510121873938334	0.569545324168019	1974.15792384599	9.98269332841594	4.17033057319266	11.4028023052071	0.988820954399861	0.520799076277975	0.529430843599899	0.580606210826208	0.981192038602797	0.979498423046467	0.980227412631467	0.980949417260883	0.862450380082042
RVARGFR	18	94.66	70.98	66.76	70.07	88.58	2912.4815971988	25.4364763426168	29.5389198477601	58.8291955777831	295.629837186316	0.969665436015188	0.509792037811038	0.568671570287472	2518.74974373085	10.4302174512832	6.48208355909297	17.081192847711	0.988694741620289	0.520342402329735	0.531512361724665	0.579239499340998	0.98075310325418	0.979724188396987	0.982586717712478	0.981755510344944	0.907681374834832
RVARGFR	19	94.73	68.36	65.8	70.37	86.2	2791.14567843987	25.7362221457672	29.4819530579076	57.6776049368492	284.423082593818	0.970442767238876	0.510914079580466	0.56916095564631	2436.94016959178	10.8093264697378	4.38133319125591	17.3927958603657	0.988407967014021	0.5209708923871	0.531205845615322	0.579302747764992	0.981824104646367	0.980696017851298	0.982325240625244	0.982493105448213	0.888364610052113
RVARGFR	20	92.87	69.9	65.36	70.52	86.62	2837.98763175989	24.8030515105597	29.1701424494445	58.3314155085259	290.339760040609	0.97023852602127	0.511644084234432	0.568919515169591	2430.56575329885	11.3280839707126	5.36203959162649	20.4943176218278	0.988487909977906	0.520806415524945	0.531424557639064	0.579115102695426	0.981538080767175	0.982407414698842	0.982987711258037	0.982394540431806	0.904047356149716
RVARGFR	21	92.04	69.51	65.68	70.2	85.57	2873.27061035729	24.6851586500404	29.475796173605	58.7059451218918	297.648995276641	0.969488424863166	0.5124346835992	0.568900761543292	2282.07989140317	8.99903494913906	4.26345903613103	13.5241856435068	0.988473894839188	0.521210910442902	0.530997687809244	0.5791234516037	0.980793149849333	0.983161851243204	0.983098040705253	0.982347995005038	0.930309728949936
RVARGFR	22	92.18	70.66	68.61	69.59	85.93	2825.76281834752	24.2647859536918	29.7224510358813	58.6517541507097	289.948739783935	0.969960939363213	0.512383017926177	0.568987637919256	2069.1831227384	8.20895990969461	4.80392307803973	11.861858442796	0.988264441525583	0.521384228847192	0.530404936322041	0.579456426568967	0.981479145263878	0.982735935567295	0.981422016296163	0.981933432490001	0.91509562588038
RVARGFR	23	91.22	67.04	64.49	69.62	85.96	2891.75512206791	24.9745546121212	29.7104214045042	60.0481703983949	304.677347767167	0.96935699416736	0.512340591285338	0.568406928496995	2371.18803821476	9.26268562193922	4.97395212061796	22.1281726488983	0.988325726797518	0.521526051640402	0.530423043105552	0.579360789043243	0.98080720544266	0.982387341291635	0.98187147285561	0.9810931965825	0.926416753744701
RVARGFR	24	91.51	70.85	66.99	70.5	85.92	2857.89321215289	24.9997853419072	29.6959913636406	58.9698656069144	293.062955920401	0.969750183437773	0.511089099956693	0.568420978806928	2214.23567411408	11.8964773429395	6.18012811671328	15.7161505793922	0.988355715909199	0.52054528219044	0.53084854481217	0.579215512551086	0.981175266989465	0.981834083302118	0.981891951681667	0.981363527892037	0.899234205317
