# Supplementary material
Source: MDPI journal article supplement (https://www.mdpi.com/2072-4292/14/10/2394)
Supplement: s1 [file s1 › ESM3_environmental_variables.csv]

site	ocean	island	longdec	latdec	depth	exposure	slope	complexity	coral_cover	soft_bottom_cover	gravity	status	reefarea_12km
RKIOSFR	indian	RUN	55.2838	-21.18278333333333	13.3	2	1	2	1	3	154	1	6.46472313612229
RVARGFR	indian	RUN	55.2825	-21.17355	11.8	2	1	1	2	2	154	1	6.66309282014624
RIGESFR	indian	RUN	55.24491666666667	-21.10863333333333	10.6	3	1	0	1	1	154	1	9.56469843819103
RCOPAFR	indian	RUN	55.22888333333333	-21.097783333333333	9.8	3	1	1	1	1	154	1	9.12074905477004
EUR1	indian	EUR	40.328077778	-22.3454305555556	14.3	3	1	2	3	3	1	3	12.0645515543328
EUR2	indian	EUR	40.396625	-22.3531	11.9	2	1	3	5	1	1	3	12.0645515543328
EUR3	indian	EUR	40.3249777777778	-22.3729361111111	13.2	3	1	2	3	1	1	3	12.0645515543328
EUR7	indian	EUR	40.3650138888889	-22.3294138888889	12.9	1	3	5	4	3	1	3	12.0645515543328
EUR8	indian	EUR	40.32785	-22.3638972222222	11.3	2	3	4	5	1	1	3	12.0645515543328
EUR9	indian	EUR	40.3344138888889	-22.3419388888889	12.1	1	3	4	4	2	1	3	12.0645515543328
EUR10	indian	EUR	40.339322	-22.339143	11.6	1	1	3	2	3	1	3	12.0645515543328
EUR11	indian	EUR	40.3497805555556	-22.3343888888889	12.4	1	1	3	2	4	1	3	12.0645515543328
EUR12	indian	EUR	40.3604055555556	-22.3307861111111	10.7	1	1	3	3	4	1	3	12.0645515543328
ENT1	pacific	NC	162.976183333333	-18.3078333333333	18	1	1	5	5	2	0	3	22.3200735898814
ENT2	pacific	NC	162.963316666667	-18.3434166666667	14	2	1	5	4	2	0	3	12.9064041038288
ENT3	pacific	NC	163.06995	-18.0151833333333	16.5	1	2	3	3	2	0	3	17.6881093854176
ENT4	pacific	NC	163.0743	-18.0113333333333	20	1	1	3	3	3	0	3	15.699179750535
GNL1	pacific	NC	163.329166666667	-19.5983666666667	16.5	1	2	3	3	5	1	3	25.4888905442689
GNL2	pacific	NC	163.325716666667	-19.5799	18.5	1	2	4	3	4	1	3	24.917858909983
ABO1	pacific	NC	166.257027777778	-22.3674722222222	16	3	2	3	3	1	25	2	21.5403022940625
ABO2	pacific	NC	166.273083333333	-22.372	16	2	3	4	4	1	25	2	22.3794634660881
ABO3	pacific	NC	166.283333333333	-22.3834444444445	13.5	2	2	4	5	1	22	2	23.5480884192959
ABO4	pacific	NC	166.292222222222	-22.3988888888889	19	2	2	3	5	2	22	2	27.2420948943152
ABO5	pacific	NC	166.301138888889	-22.4127222222222	16.5	3	2	3	3	2	20	2	28.5016886693023
ABO6	pacific	NC	166.31825	-22.4170555555555	17.5	2	3	2	4	2	20	2	31.975158412666
MBE1	pacific	NC	166.183416666667	-22.2850555555556	16	1	1	3	2	3	20	1	20.2025881915875
MBE2	pacific	NC	166.184611111111	-22.3050555555556	16	3	1	2	4	1	20	1	18.7428773711726
MBE3	pacific	NC	166.199833333333	-22.3048611111111	17.5	2	3	4	4	1	22	1	19.3140894618515
MBE4	pacific	NC	166.215972222222	-22.31425	17.5	2	3	4	4	1	22	1	20.7371775484347
MBE5	pacific	NC	166.238972222222	-22.3551111111111	18.5	3	2	2	2	3	25	1	20.6238748353992
MBE6	pacific	NC	166.231583333333	-22.3448055555555	17	2	3	5	4	1	25	1	21.0721829346251
