# Supplementary material
Source: MDPI journal article supplement (https://www.mdpi.com/2072-4292/14/10/2394)
Supplement: s1 [file s1 › ESM4_fish_taxo.csv]

site	SR	ABUND	log(BIOM)	taxo_distrib_abund	taxo_distrib_log_biom
RKIOSFR	50.6666666666667	274.666666666667	9.94687328667912	3.0556273107331	3.83065718590898
RVARGFR	46.6666666666667	251.666666666667	9.88383022621546	3.06351818176821	3.74973332839477
RIGESFR	39.6666666666667	230.666666666667	9.67675732399706	2.89961800666134	3.5331160645488
RCOPAFR	41.3333333333333	250.333333333333	10.306236627155	2.93943499744611	3.64935944027283
EUR1	66	482	10.9152906060005	1.94126633621725	4.10077273954367
EUR2	71	322	11.9179915330847	2.41925632617901	4.18321130877133
EUR3	57	270	10.9340859777618	2.69020590910548	3.91859649907934
EUR7	63	1367	12.8648666541835	1.34587421045473	4.02383284976105
EUR8	76	522	12.0394843885095	2.65978625315156	4.25170111865432
EUR9	73	1373	12.0243652119611	1.27171250085816	4.19149474732984
EUR10	66	413	11.0883523462196	1.98664268262748	4.10902478742992
EUR11	62	163	10.6722511408261	3.35074396949182	4.06461120245833
EUR12	61	290	11.3975348671403	2.59351233237862	3.96281851871648
ABO1	65	290	11.5996343765291	2.81820450897099	4.06858083601798
ABO2	39	160	10.6505450985254	1.9618587126137	3.55455619165402
ABO3	61	323	11.0781689256546	1.93064703307993	3.99062315738332
ABO4	61	745	11.4802581805813	1.52158015886228	3.9885575048
ABO5	51	217	12.613110019839	2.78372909119974	3.79908482689516
ABO6	61	124	9.84329077791766	3.66124063157875	4.01392246446957
MBE1	40	98	10.6293502642351	3.02894726508999	3.61893825779464
MBE2	55	153	9.64985347764704	2.86644062427921	3.92901782136753
MBE3	50	97	11.0317439049346	3.4748042711814	3.8342846984399
MBE4	72	186	11.4774269664915	3.34396027854705	4.18179654334307
MBE5	57	142	10.8870052752045	3.41678427443362	3.94807158593427
MBE6	68	353	11.2794940628206	2.69430072941331	4.117793456753
ENT1	72	270	12.0350270527868	2.4322845772693	4.19681043158852
ENT2	59	123	11.821235688064	3.67402250948907	3.96562248981089
ENT3	68	171	10.3346796202443	3.34712969667969	4.14414769284958
ENT4	46	84	11.6524054354128	3.54998295135296	3.74407815881354
GNL1	75	137	9.89799856314934	4.09473306568387	4.23363959820806
GNL2	55	305	11.9476026091954	1.8690594072492	3.91001110550278
