# Supplementary material
Source: MDPI journal article supplement (https://www.mdpi.com/2072-4292/14/10/2394)
Supplement: s1 [file s1 › ESM5_fish_functional_richness.csv]

site	diets_size	diets_hrange	diets_school	diets_lwater	size_hrange	size_school	size_lwater	hrange_school	hrange_lwater	school_lwater	diets_size_hrange	diets_size_school	diets_size_lwater	diets_hrange_school	diets_hrange_lwater	diets_school_lwater	size_hrange_school	size_hrange_lwater	size_school_lwater	hrange_school_lwater	diets_size_hrange_school	diets_size_hrange_lwater	diets_size_school_lwater	diets_hrange_school_lwater	size_hrange_school_lwater	diets_size_hrange_school_lwater
RKIOSFR	19	13.6666666666667	19	11.3333333333333	9.33333333333333	15	9.33333333333333	8.33333333333333	5.33333333333333	9.33333333333333	23.6666666666667	32	21.6666666666667	24.3333333333333	16.3333333333333	21.6666666666667	19.3333333333333	12.6666666666667	19.6666666666667	12.6666666666667	36	25.6666666666667	33.6666666666667	26	24	37
RVARGFR	18.3333333333333	13	17.6666666666667	11	9	14.6666666666667	9	8.66666666666667	5	8.66666666666667	23	31.6666666666667	22	23.3333333333333	16.3333333333333	20.6666666666667	18.6666666666667	12.3333333333333	20	13.3333333333333	34.3333333333333	26	34	25.3333333333333	24	36
RIGESFR	17.3333333333333	11	16	9	9.33333333333333	14	8.66666666666667	8	4.66666666666667	8	20.6666666666667	27.6666666666667	19.3333333333333	21	12.6666666666667	18	18	12	17.3333333333333	12	30	22.3333333333333	29.3333333333333	22	21.6666666666667	31
RCOPAFR	18.3333333333333	12.3333333333333	16	9.33333333333333	9.66666666666667	16.3333333333333	8.33333333333333	9.66666666666667	5	7.66666666666667	21.6666666666667	30	20	21.6666666666667	13.6666666666667	17.6666666666667	20	13	18.6666666666667	12.6666666666667	31.6666666666667	22.6666666666667	31	23	22.3333333333333	32.3333333333333
EUR1	22	16	19	12	14	19	12	12	7	10	32	37	28	29	22	26	26	20	25	18	45	36	42	34	31	47
EUR2	23	14	19	13	13	19	13	10	6	10	30	40	32	27	21	24	26	19	27	18	44	37	46	32	32	49
EUR3	21	14	18	11	12	18	10	10	5	10	28	37	24	28	16	21	24	14	20	13	42	30	39	29	26	43
EUR7	20	15	18	13	11	20	12	12	7	11	30	38	29	27	23	23	26	17	26	19	43	37	43	32	31	47
EUR8	25	15	23	13	14	20	13	12	6	11	33	43	37	31	21	28	28	20	32	20	48	41	51	35	37	54
EUR9	23	14	20	12	14	20	12	12	6	10	31	42	30	29	19	25	27	19	27	18	46	36	47	33	32	50
EUR10	21	11	18	11	11	16	10	11	5	9	26	36	28	24	15	21	23	17	21	15	40	31	39	26	27	43
EUR11	19	13	18	12	13	18	12	10	6	10	26	33	26	24	18	21	24	18	24	16	38	31	37	27	28	41
EUR12	21	13	19	13	12	21	13	12	6	11	27	38	30	26	20	23	26	18	28	18	41	34	42	30	32	45
ENT1	25	16	25	14	12	21	12	13	8	11	34	45	31	36	21	32	31	21	29	22	51	39	49	40	38	54
ENT2	21	16	24	14	10	21	12	14	8	12	26	42	27	36	22	30	25	16	29	22	42	30	44	38	31	44
ENT3	21	16	21	14	10	20	12	13	7	11	28	42	30	30	21	27	26	18	28	19	42	34	47	34	31	47
ENT4	18	16	20	14	10	19	12	12	8	12	26	30	26	26	21	23	25	17	22	20	35	30	31	28	26	35
GNL1	20	13	21	12	9	19	14	11	7	11	24	39	28	28	18	25	22	17	27	17	41	30	45	32	30	47
GNL2	22	12	19	12	11	18	14	11	5	10	27	36	27	24	16	23	23	16	23	14	37	28	37	27	27	37
ABO1	22	15	19	14	12	21	13	13	6	12	29	38	30	28	23	27	26	19	29	20	41	36	45	34	33	47
ABO2	14	10	18	13	8	15	11	9	5	10	16	24	20	19	14	23	17	12	20	12	24	20	28	23	21	28
ABO3	21	13	19	11	10	18	13	12	7	11	25	35	27	26	17	25	22	16	25	17	36	30	40	31	27	41
ABO4	18	11	19	12	8	15	11	9	5	11	21	32	24	23	16	25	18	12	22	14	33	26	36	28	24	37
ABO5	23	15	20	15	11	21	13	12	7	12	26	36	28	27	20	28	26	18	28	19	38	31	39	31	31	41
ABO6	24	14	20	12	11	19	13	11	6	11	28	41	32	28	19	26	23	17	26	16	42	34	46	32	28	47
MBE1	21	13	20	12	9	15	11	11	6	10	25	32	24	27	16	23	20	14	20	16	33	26	33	28	24	34
MBE2	21	13	18	12	9	16	12	10	6	9	24	35	26	25	18	23	20	15	22	14	37	29	40	29	25	42
MBE3	22	12	19	12	11	15	10	10	7	9	26	35	27	23	17	24	20	16	21	15	37	30	40	28	26	41
MBE4	22	15	19	13	10	20	14	14	7	12	28	37	30	28	21	25	27	19	29	20	42	36	43	33	34	47
MBE5	22	12	19	13	9	18	12	10	6	11	23	37	27	26	17	26	22	14	26	15	38	28	40	30	28	41
MBE6	20	12	18	13	11	20	14	14	6	12	25	39	27	29	17	26	27	18	31	21	44	30	45	35	34	47
