# Supplementary material
Source: MDPI journal article supplement (https://www.mdpi.com/2072-4292/14/10/2394)
Supplement: s1 [file s1 › ESM6_fish_functional_distrib_nb_species.csv]

site	diets_size	diets_hrange	diets_school	diets_lwater	size_hrange	size_school	size_lwater	hrange_school	hrange_lwater	school_lwater	diets_size_hrange	diets_size_school	diets_size_lwater	diets_hrange_school	diets_hrange_lwater	diets_school_lwater	size_hrange_school	size_hrange_lwater	size_school_lwater	hrange_school_lwater	diets_size_hrange_school	diets_size_hrange_lwater	diets_size_school_lwater	diets_hrange_school_lwater	size_hrange_school_lwater	diets_size_hrange_school_lwater
RKIOSFR	2.72786606210279	2.35694716402566	2.65443959534036	1.99408323861793	1.8404637327622	2.5112143103223	1.84209387851183	1.90249258894881	1.2721283297978	1.76569957190387	3.00522331664912	3.34843496729358	2.86258237537501	2.98180571477673	2.48330300111244	2.77611233934646	2.75952575285623	2.15257071395829	2.73130818708144	2.2158027216875	3.49915101896657	3.08595968093914	3.41359671778629	3.05494616252293	2.95599202149923	3.53689304497123
RVARGFR	2.68620926992686	2.28434905555038	2.58324092182546	1.98244161408931	1.82166660642699	2.45498024736493	1.84749343272163	1.87072724498193	1.2476583054947	1.74796281914037	2.95392660334479	3.3044961730317	2.86527151997213	2.90826016614461	2.46921736122422	2.75642048131142	2.70751570081148	2.17172517841933	2.72426065426995	2.2189859221716	3.42650583116913	3.08658756295153	3.40634353110567	3.01793178046924	2.94046141836803	3.49096274895822
RIGESFR	2.62644348880356	2.18217894325172	2.50881382364204	1.80845194412816	1.83426046598219	2.42986764731806	1.74784109356628	1.86897224473409	1.16828295728801	1.60495294191692	2.83934814547669	3.2133024325789	2.73621642239806	2.86038037221419	2.28711046823994	2.63859909761561	2.66658110390931	2.0812950228891	2.62605429480142	2.1562377668937	3.29907207934954	2.92691561056943	3.27823786824862	2.92558857257561	2.84750505871187	3.33530956112957
RCOPAFR	2.7334427381249	2.29499841694986	2.52145160307278	1.84406589069289	1.86671084315888	2.58686396448715	1.78416745695383	2.00870524486157	1.23396824624479	1.61754398958986	2.9129808757198	3.298633110585	2.79919519629655	2.90094424203157	2.37548934400553	2.60088479533407	2.7765152310622	2.11169848578677	2.70340691336597	2.21557475237374	3.36427392666557	2.95318421089918	3.33434803960675	2.9642627831657	2.86985184532699	3.38924238777166
EUR1	2.81246913358405	2.45949295881906	2.57668398881149	2.05281828248466	2.21690292691356	2.68427218199938	2.05574089343598	2.09096056618404	1.4293558788862	1.78332305427939	3.2556315964874	3.46201600623569	3.05117490708027	3.09064675173813	2.67743674344002	2.84365142233041	3.02939292579498	2.5524261640646	2.92924779250193	2.40413629207772	3.70099306860059	3.37546109079174	3.59597076851575	3.25048314082694	3.20125696258551	3.75092999081278
EUR2	2.85559943418918	2.27059241960124	2.56428852509804	2.08691457384249	2.11838277450995	2.65272483108641	2.0853452517737	1.93281563455484	1.3124048501313	1.75237855280434	3.13128487166128	3.47171547339718	3.17294600915979	2.94777921770944	2.57820928270214	2.81831567749143	2.95952467906795	2.48150074963681	2.91736560960432	2.32448992070252	3.60839238223998	3.35821845179753	3.64605946979577	3.15903857407197	3.159154786787	3.74409434081459
EUR3	2.82805664347707	2.34886602021748	2.58018618572621	1.91838404015439	2.03642289454232	2.60772556171382	1.79314020074507	1.94298304315687	1.1190129976523	1.5671616240172	3.15984567819059	3.46530974865408	2.94691846456799	3.05491060707008	2.42606699655382	2.70717032444917	2.94370004228424	2.23373146416009	2.70198567304206	2.10162110361285	3.63233800229734	3.23159412756459	3.52909281776979	3.09880555650326	3.01544849165824	3.66583874799706
EUR7	2.81437268222706	2.44323534732414	2.6817382821496	2.17015935352583	2.08506603985222	2.78725859699884	2.1161208272642	2.15601329572862	1.45171979787397	1.89539570380349	3.14398238667247	3.48437751529278	3.11569170473012	3.09187387993247	2.72301189522055	2.87975014373846	3.07981171187489	2.50716547478069	2.98639940206425	2.47150686033881	3.62471107577665	3.3518890993649	3.60270640337792	3.24480783324672	3.22014527235877	3.72103529146306
EUR8	3.00751751759751	2.40072072959157	2.68449900307391	2.24733906143171	2.12319370028977	2.7455937154418	2.19207682655728	2.09314589206374	1.44465979457691	1.90127076506869	3.27135840012638	3.53375929711121	3.36830041874465	3.05959025375347	2.71195981557289	2.93484824026188	3.05935466078856	2.56788073687691	3.12678964671544	2.51090213423206	3.69104089061535	3.50083808503633	3.74332419381542	3.25965836873881	3.32872995563778	3.84626527354821
EUR9	2.9230294274216	2.39644540129694	2.67885782372116	2.16709003833028	2.27029805748884	2.80174154725902	2.16712260769219	2.13965661553034	1.40873812669068	1.84825361467995	3.22843954220311	3.55473646930248	3.19857489686841	3.09418770571492	2.63438303195855	2.90913175676419	3.1059842022543	2.60142784780705	3.03813888949166	2.45213122156022	3.66843319671873	3.38477170517868	3.67333323971768	3.25113640474652	3.27067766219069	3.76803963341996
EUR10	2.78543730770246	2.15356764283561	2.48876348718052	1.93309770472691	2.06975191470513	2.55534146262828	1.97548091679822	1.89648998308112	1.16949581792068	1.57360922181389	3.02868218182422	3.396223079667	3.00594698542647	2.87521122476627	2.36897584668075	2.66175063901636	2.92819898236493	2.41921477516591	2.75806568195518	2.11781199589467	3.54603384630357	3.19027812502079	3.47509246407441	2.99121236241583	3.05805409912152	3.62490323071097
EUR11	2.69139868086719	2.24195264269317	2.49840339505812	2.0725527107824	2.1778075372628	2.64447723424875	2.03449077848172	1.90980650912395	1.30712370997041	1.72995908944209	3.0283767602636	3.32907515291041	2.9624144761617	2.84405013135119	2.48766931534754	2.66483066468812	2.94377036021209	2.4455045835711	2.87373272870349	2.21337314428038	3.49403174438789	3.18099753381243	3.44931257144854	2.97958223991755	3.08748384052703	3.57798947617642
EUR12	2.83805941787598	2.27665838984156	2.55333036487577	2.09169319997511	2.11330006539699	2.73653798734936	2.1454279110654	1.99312993200925	1.36078627190003	1.8324118073297	3.09245142782495	3.45833917726761	3.12792873953119	2.92782918796512	2.57403518679819	2.76966787648673	2.99223121929488	2.50556324993437	2.98095503486949	2.33647414819701	3.58102317703975	3.30669927803618	3.57497724080487	3.12122350112737	3.20420951314409	3.68908340215465
ENT1	2.96350236676432	2.51303950558718	2.89745503055256	2.20370116978446	2.21130643429252	2.86102052806442	2.1315468679195	2.22858636403601	1.56727106979129	1.86462035047725	3.31501763994629	3.65447804727681	3.22442802518286	3.31917848218637	2.72427590197626	3.06857032564509	3.24408494737532	2.63111195332181	3.08238207141058	2.56851771804272	3.81928741633152	3.4772790913597	3.74602907133248	3.41072950624204	3.40889431643003	3.88431701670824
ENT2	2.84022295280174	2.53170720880012	2.98161051347136	2.34041967908221	2.01279760136673	2.94689889579393	2.23272569661906	2.47912697620549	1.66518092432395	2.13517163356411	3.04039336033194	3.64262224536171	3.12141635580488	3.43573965814934	2.76951043907165	3.20194775743481	3.08787798336545	2.42618653947271	3.23889892878114	2.80739652914403	3.64262224536171	3.19190589959064	3.70735249976458	3.5004699125522	3.29476057057782	3.70735249976458
ENT3	2.81237888219306	2.36586592814613	2.81624395001604	2.18902581186651	1.88176880905223	2.72364273250858	2.07633638276651	2.14442237978934	1.50326768055108	1.95303691527468	3.04760084242455	3.58610404737441	3.07795361504692	3.10208402490451	2.61694763274626	3.04674778252052	2.94727682912672	2.42581455149322	3.04792896546825	2.48759458600517	3.58610404737441	3.21812581253324	3.70342710756748	3.2537389254339	3.1702490561553	3.70342710756748
ENT4	2.75299634448148	2.49440333124938	2.72835237009226	2.26692556786967	2.12289117889805	2.75737363003598	2.27791128696601	2.25060471031812	1.70875165896861	2.03370037498793	3.09587647743982	3.30095221490265	3.09587647743982	3.08999437734093	2.72811108810522	2.88428811734033	3.07711460314948	2.62506209408865	2.89478878498076	2.6242521997516	3.47438630388371	3.23917373248348	3.33108904884004	3.16902991950604	3.10725143708687	3.47438630388371
GNL1	2.7196209385629	2.20720010810451	2.71931365115389	2.07011325259857	1.63696067528718	2.6500819387605	2.01287286126966	2.05934595171811	1.37671886304046	1.89924366419952	2.84900841226742	3.47745054113687	2.95522201905218	3.06707388046207	2.474381972875	2.91662110670366	2.78796910239697	2.20292696911631	2.92847713850974	2.40119534916847	3.52929462752101	3.04066500120998	3.60928401577704	3.23432679711727	3.05485701924814	3.66112810216118
GNL2	2.86056883252338	2.26108938522469	2.6998231177873	2.18181232669984	1.96790238284181	2.64766107673206	2.11177125430438	1.92519935978286	1.26547085830827	1.76224238463265	3.02716714740959	3.42093917712147	3.02257311942385	2.92488536768367	2.47118903131716	2.89036821252948	2.83820617147423	2.32254127227842	2.86056883252338	2.15957133237371	3.44614452914183	3.06806424883641	3.44614452914183	3.05676472793561	3.00070322322482	3.44614452914183
ABO1	2.92317753808885	2.42865240709287	2.73545960972128	2.33269732700812	2.08002003277451	2.79813127924382	2.23068681128704	2.13660473912836	1.5430669183051	2.07656249219503	3.17883334221355	3.52086451423858	3.23476618743809	3.06040134124443	2.79020056922569	3.07191985189151	2.98096481212494	2.57212851466093	3.12351922671677	2.57231558072592	3.60094727379071	3.39599665221993	3.7156352730117	3.32891606423736	3.26758480293598	3.76634045556561
ABO2	2.43556105905982	1.94344042685554	2.54099628934929	2.14684968226678	1.89337356003948	2.54867784425406	2.04021165448833	1.8342837963648	1.27665401647073	1.81868193205302	2.53526122518317	3.01031686038804	2.76372880927358	2.58995891767966	2.23277268408324	2.82536436342516	2.65531587203251	2.23454759354585	2.81269143760395	2.10904540549367	3.01031686038804	2.76372880927358	3.18804690668546	2.82536436342516	2.86165406593432	3.18804690668546
ABO3	2.8704981715469	2.33233199181643	2.63419552231745	2.10005537894313	1.86594441986887	2.62016226963755	2.06559779945264	2.00548851543598	1.37819909097278	1.81414988751701	3.01316327601247	3.42608237394757	3.10934475884423	2.9896993171074	2.57547899717576	2.90192922888248	2.77924522911033	2.2797301831012	2.94538182115333	2.34029909024693	3.46295680966027	3.21740498395913	3.57658749499797	3.190536690511	3.04486420784586	3.61346193071068
ABO4	2.65511554315465	2.13444712810717	2.61615537723675	2.15257744564555	1.68129598379351	2.5160136883753	1.99096445979126	1.86132491167024	1.32515390659594	1.9449481320354	2.78289452713751	3.27172862217777	2.87493385358868	2.84459821246426	2.41888125351937	2.90594430341739	2.662558603396	2.14769746742743	2.88556811818646	2.27526126583509	3.32689351291624	2.97998670050401	3.40364976254123	3.05417986810577	2.99109644111387	3.45881465327969
ABO5	2.92949939169127	2.45916365339569	2.677114930348	2.31537055755434	2.13433402860359	2.84659538085987	2.20583861509377	2.15507343415451	1.49174272980422	1.93269180857259	3.12608671592847	3.45946774482623	3.14029462336516	3.05839681652805	2.7078756858899	2.99105799684004	3.07036494747196	2.51409684474817	3.10114425004635	2.46706683107356	3.56819671432583	3.29277723037735	3.55793694680104	3.19904474541846	3.22679569439605	3.64974344145053
ABO6	3.01939303840421	2.45406503956441	2.78099074728321	2.21156915423989	1.90069801434611	2.70679757968146	2.09577046741648	2.07521275243207	1.38946065187146	1.88738335118961	3.19167146869202	3.60488409228831	3.27653008072729	3.13489632376046	2.70621867298709	3.03211303320716	2.89765999065622	2.29910443905511	3.01408492400686	2.40104994774354	3.63618806777822	3.37762272161292	3.74424829289311	3.30717475404827	3.11961324693427	3.77555226838302
MBE1	2.926417555498	2.42053362693881	2.79846123458515	2.16087001681817	1.82155862382217	2.52897221328252	1.93999090962121	2.13623286531601	1.39547252492495	1.91262926681072	3.06504699160999	3.39853937829584	3.03038963258199	3.14962107661947	2.56547985153119	2.94340745917754	2.75458382279896	2.19777773245066	2.77442944150679	2.46714701125867	3.43319673732384	3.09970435063798	3.43319673732384	3.21217137956174	2.9261400812129	3.46785409635184
MBE2	2.81349358430399	2.34516227121535	2.66249993337361	2.14723431738532	1.82231671133758	2.52830522827293	1.95118771727489	1.95417639406697	1.32608175566499	1.77803392952394	2.97090384321872	3.42919420757097	3.01639497263129	3.04651989927981	2.61469345911232	2.91683213671424	2.78401975094031	2.22029792309673	2.84361851095252	2.28707774271672	3.5094042916178	3.16429162893211	3.57424817290058	3.23372953820064	3.02623412188761	3.64494465433351
MBE3	2.96741636915065	2.36285838234887	2.67405902253232	2.22507133428259	1.98587712672392	2.55152806081468	2.0217065287764	2.01925773192178	1.4392598356511	1.77339124074961	3.13515612186587	3.42516452898778	3.18381193483885	2.96603193976981	2.63699029450451	2.98696186552039	2.80611447660057	2.33423235248468	2.87006670380508	2.35892936211771	3.5201915829111	3.28791952225663	3.61383420745359	3.2033574312086	3.05368295148657	3.65202505755127
MBE4	2.91540120230841	2.45107525534487	2.58935990396516	2.23396218301127	1.94690135923349	2.71485328578313	2.20980481158781	2.14647417535785	1.548394246097	1.92717441938958	3.12815758343842	3.44013515779774	3.19237992690351	3.05449640459581	2.73580848113061	2.88410403439791	2.94373084592232	2.47727817719726	3.08303358671712	2.52345493384417	3.57019435855119	3.3656667220435	3.62419861520134	3.2497393581066	3.24625644742278	3.72046905694578
MBE5	2.84842023801498	2.24071051937175	2.76659170886075	2.11936921287928	1.78895594080551	2.54026519017226	2.05041437286005	2.05192859292421	1.38243272862209	2.0211327695776	2.92734446883868	3.48045091036207	3.00474016397158	3.05781490540062	2.45984579155217	3.04219826883725	2.78045102372365	2.26102345198327	2.90051066183887	2.39908642592365	3.51991302577392	3.08366439479527	3.56855493318163	3.2171585348444	3.05733943054524	3.60801704859348
MBE6	2.73197145759496	2.33449519274374	2.68682046651341	2.21973816836162	1.82799641374604	2.70791089830527	2.13455986924701	2.20202988737092	1.48698082003679	2.0760099424311	2.93498353279438	3.49456325926175	3.0202739879955	3.16669651839336	2.62007195784789	3.02898677641912	2.93985922354179	2.34282148783202	3.15055221411045	2.59968695877501	3.62457817559239	3.13759704818856	3.67406432757837	3.36056927521715	3.25248562301633	3.72253251678431
