# Supplementary material
Source: MDPI journal article supplement (https://www.mdpi.com/2072-4292/14/10/2394)
Supplement: s1 [file s1 › ESM7_fish_functional_distrib_abund.csv]

site	diets_size	diets_hrange	diets_school	diets_lwater	size_hrange	size_school	size_lwater	hrange_school	hrange_lwater	school_lwater	diets_size_hrange	diets_size_school	diets_size_lwater	diets_hrange_school	diets_hrange_lwater	diets_school_lwater	size_hrange_school	size_hrange_lwater	size_school_lwater	hrange_school_lwater	diets_size_hrange_school	diets_size_hrange_lwater	diets_size_school_lwater	diets_hrange_school_lwater	size_hrange_school_lwater	diets_size_hrange_school_lwater
RKIOSFR	2.38068008246131	1.88566470422641	2.29181730324508	1.6637993827943	1.69370004317431	2.30457410478017	1.8113162476425	1.79074581289439	1.24787499529101	1.7882912463078	2.48206419194262	2.78760059240868	2.41733198218912	2.47149143206095	1.91950187549245	2.32334813560112	2.43285671351817	1.95960217824989	2.45249187880418	2.0756349349674	2.83528738535268	2.5047639098553	2.80397651021875	2.49092502671229	2.57235202444058	2.84391193623901
RVARGFR	2.28787047257723	1.83777181705047	2.11118239905597	1.55635507699382	1.64711644350575	2.1788199015714	1.68040395523291	1.73501451716968	1.14997691316086	1.62457101343733	2.43850765398113	2.7032484617183	2.36134881197351	2.35496360936909	1.91851198695849	2.17683655866358	2.35821048874514	1.87962660539017	2.35632050941716	1.99810959548271	2.77454331811872	2.49533790071939	2.74412675877812	2.40362590101155	2.51192343777036	2.80016672230645
RIGESFR	2.23627343867348	1.83639634309866	2.07310456068229	1.52893067196543	1.61905476815672	2.11392562355025	1.59722578895231	1.65529195757718	1.10383716977985	1.47013572999168	2.37287915952017	2.60940735232751	2.27011033378914	2.35578136434496	1.86433889630554	2.13121409327131	2.2491091590416	1.77747843433874	2.22107449391301	1.8744331239586	2.64708258758589	2.39460197389816	2.63089515009309	2.375283430465	2.34873292920344	2.65735146392129
RCOPAFR	2.22381529655241	1.87034176640794	2.06232903360073	1.57355506264002	1.57746407198566	2.20304915050478	1.53809175983928	1.70171088208969	1.1365370006181	1.53484679738986	2.33526891360935	2.62080634793996	2.2584533731829	2.30492937989213	1.90781833185269	2.10068924416386	2.31326183323932	1.73207271688866	2.26740463067072	1.91824047979992	2.64164908268392	2.36291983473547	2.64880296079425	2.3383379745583	2.36788241897548	2.66632808406554
EUR1	1.28652657329248	1.08767575019147	1.49288775113383	0.982952636162158	0.979562469000136	1.57500518594659	1.08627506198329	1.36769546227488	0.796976498195893	1.27805061128321	1.39397743710627	1.77856381040673	1.34435491538559	1.633557057948	1.13422788951875	1.56677896092894	1.66217304243765	1.20401074145095	1.640265415019	1.44651134282338	1.8353442753102	1.42314630561821	1.80978348434203	1.66422554416421	1.71003342526116	1.84505824051171
EUR2	1.95651206562847	1.42890236466487	1.43198099685473	1.29519352531287	1.46629488690883	1.85477458195937	1.61693600742688	1.27977548367277	0.995276047153143	1.15456881164825	2.03465773251801	2.13861089684274	2.06980047855088	1.64838275067828	1.54350593129914	1.53902390521952	1.94484848270249	1.75184081485294	1.95615524180167	1.4376171424178	2.17964304436061	2.12030304407623	2.20670413238485	1.72720331933705	2.02088654012456	2.23091071009589
EUR3	2.10280022206761	1.51964954319828	2.01111875879285	1.35819256178961	1.61072226182231	2.10880707167729	1.62251510080007	1.71603032176021	0.979492623072721	1.56099856761544	2.21132864841582	2.49918148582373	2.14347028128099	2.21174681767827	1.54845181341169	2.06647511514491	2.2548730223007	1.79515092642791	2.14950312275689	1.78851281451814	2.5574491476155	2.23710818857262	2.52359509223858	2.22725751071567	2.28445865624839	2.56771799473491
EUR7	0.91245750819635	0.907552978126874	0.826379109553636	0.871256153940181	0.864031064588084	1.08185352527126	0.947415666592619	1.01557528335241	0.846331356108605	0.949915507938366	0.974230851470381	1.13389684413466	1.03684857292889	1.08943422800682	0.998618947310739	1.02985680160485	1.10533445581633	0.982306260781983	1.12700349967508	1.07578418222265	1.14653997665191	1.05887403487196	1.17297899146383	1.13254944857297	1.14601142326945	1.1846080095984
EUR8	1.51538792230051	1.75192927870184	1.82036573929173	1.6583884402813	1.61494356009207	1.89454608009131	1.72931973183401	1.82078874774941	1.38620659539936	1.76643008923001	2.05599216478487	2.11294868149453	2.0803035601217	2.12559130148226	1.84555178760365	2.10016030081879	2.1958460244222	1.8274347925191	2.216412358436	1.98234588055612	2.36512028573136	2.1136217630762	2.37819775739016	2.1780475673533	2.25976042930251	2.40213368519746
EUR9	0.680919216515782	0.635805941554992	0.990751183653278	0.500522902689195	0.554785826479924	1.07718106179158	0.589159433680728	1.01140785098987	0.515468591299642	0.891052922246901	0.709718959163055	1.1403512121856	0.70787596283153	1.09796458652311	0.660375077197788	1.01172510350395	1.10242957179804	0.636890778297316	1.09973580112286	1.04228786177421	1.1512524852899	0.726715703913696	1.15350637906606	1.11330627873614	1.11845409256234	1.16238828674993
EUR10	1.29982924306275	1.13418305477464	1.55151123350352	1.07603753965992	0.979615081006473	1.55969181305481	1.0566529615472	1.35044385819496	0.801864591121433	1.26811727708018	1.35388059470218	1.78616817651348	1.34817649898649	1.64196884824148	1.18250146413484	1.58719117143738	1.64513320649369	1.16654817425082	1.60808585933624	1.4044047163422	1.81973462593527	1.39154612030491	1.80483014137687	1.66745796140626	1.6763721214769	1.83839659079866
EUR11	2.4174668328457	2.06510475629976	2.16695873734709	1.93834504837906	1.94367451593206	2.39200788177719	2.03187402031424	1.91093308286081	1.52995245847512	1.74788368764177	2.58969200523754	2.78479315598914	2.60908610173477	2.4408148225494	2.23849973233689	2.24864880563225	2.54665670131824	2.2513283785377	2.50974192104502	2.08536752901666	2.87128217491602	2.71590482576188	2.85063764525316	2.49890994993534	2.6156131233946	2.91214656265253
EUR12	1.87534085682962	1.70033832586094	1.77420654562137	1.64258171996581	1.50586344828661	2.11961744775605	1.63575485391645	1.91280908676464	1.36172260016517	1.82281717134257	1.95548985393583	2.37739284051731	1.97745561321095	2.21890950250397	1.80384232654081	2.16217964156546	2.19479225559061	1.73864071352663	2.21167708913605	2.0349237241304	2.40524178396182	2.03316385235503	2.41196509409006	2.27623513478685	2.27699080987884	2.43777103886972
ENT1	1.90287253603722	1.7137864409425	1.85034893381358	1.53509569064028	1.53424194799477	1.84578928743217	1.58594502231963	1.57421187904276	1.22290845606937	1.45449132846304	2.03426702152	2.18579380889697	2.00865417444501	2.06533082788764	1.78178541426905	1.97401725841531	1.97693661302945	1.75146467212819	1.96626142765339	1.72651582070202	2.23781748919835	2.0861832794631	2.21921775104755	2.09707318976147	2.07174367978541	2.25929100395278
ENT2	2.62411832756161	2.33536918641785	2.64257578530327	2.24350245533361	2.03184525599087	2.75175355059628	2.2990619978983	2.39312418698566	1.71487177491807	2.2203678288155	2.80528775364003	3.29334597094255	2.90308929293258	3.15384369064008	2.54917886279196	3.03265016429827	2.92100977278804	2.42957361085074	3.09829574196567	2.72677985851326	3.29334597094255	2.96645935815985	3.3780988839184	3.23859660361594	3.13210779955396	3.3780988839184
ENT3	2.37779709508293	1.87397606594709	2.37453515860428	1.75923787203019	1.68426021581155	2.38110214681849	1.96748469901173	2.03449136078165	1.42349847338495	1.89655946259396	2.57042958422881	2.87653784584544	2.56977852472424	2.58776093475996	2.06913386351525	2.55634813976634	2.50612631662562	2.24916307266753	2.63901625423681	2.32673229077372	2.87653784584544	2.68995766465547	2.97515632939734	2.72283805897985	2.69906026654037	2.97515632939734
ENT4	2.53469984942035	2.28624660715992	2.67004827934667	2.09063363281681	1.99320018788781	2.68578473877361	2.22553639194262	2.24745785010773	1.64401796516484	2.03230002245974	2.80375732908648	3.09762339151854	2.82143018464481	2.96189542811601	2.46209180907235	2.7648919593672	2.91142871949927	2.48012954321386	2.79473483814667	2.5787584955663	3.21533185101869	2.92263513984591	3.11412689581759	3.00517679644452	2.93416136836694	3.21533185101869
GNL1	2.5829074085199	2.11675140973566	2.71725743094989	1.97502209436745	1.45296646898094	2.55405482792828	1.89605600782464	2.0640190128255	1.33022871875461	1.97034970136409	2.69797846051623	3.31655411863554	2.75639412711271	2.97655685382337	2.30200518964764	2.85340788182354	2.63933091918204	2.04249440304319	2.80597945215806	2.37396343579131	3.34640566326559	2.82717010182259	3.39956164027723	3.09070612739737	2.88311161818138	3.42941318490728
GNL2	1.49472872118616	1.37517025072806	1.45324129861249	1.35258107057963	1.28383793503863	1.45055801788155	1.34309951970899	1.29563717410174	0.8951135456742	1.25135821640846	1.56802562217371	1.69991240448187	1.57085528190274	1.57966756569288	1.42502018790914	1.56805066338165	1.53136447017837	1.38483585588303	1.55294636109832	1.35928106336946	1.70617319957985	1.5790586003214	1.70617319957985	1.60993684040692	1.58059224558307	1.70617319957985
ABO1	2.09929049712014	2.00378199039167	2.10590245486854	2.06856209239396	1.82046364531672	2.28676649752559	1.98754618582087	1.9843765597641	1.43031436337306	1.9912794051977	2.27252825710776	2.53673652432819	2.37969925814736	2.37445087437941	2.22988714274823	2.43084957245857	2.33749058970904	2.10554349969833	2.44361160031494	2.23535521986346	2.55970512846974	2.43361996666737	2.64184796752941	2.51687342402207	2.48542453895316	2.65706022484864
ABO2	1.5069652526957	1.36807643876579	1.38529136308066	1.46458230842366	1.26984993919089	1.43584595139838	1.35251485861912	1.29189723809422	1.06417308933296	1.26144403328216	1.56086722077201	1.71397506721758	1.66005916840865	1.59472868000826	1.48609500715287	1.69314324218315	1.58251274477717	1.41316523691812	1.65272266681985	1.40309319495766	1.71397506721758	1.66005916840865	1.79565706011062	1.69314324218315	1.67375428141389	1.79565706011062
ABO3	1.56177897320743	1.42485840478583	1.21928699637721	1.37733310578091	1.20695851975163	1.44778750376111	1.35116072860478	1.345439584912	1.1498184376408	1.31544435294699	1.60489935790836	1.73518928986367	1.63997372131898	1.64046854843817	1.48850238107975	1.62233609380115	1.54740064946796	1.40117475018578	1.60095701944759	1.45698482387251	1.74215319258341	1.66134359057243	1.77135323045971	1.68748818254175	1.62350305304076	1.77831713317945
ABO4	1.08863038808354	1.01472307433104	1.12527796034504	1.01909607038127	0.927090185278199	1.14024327698492	1.01406556380795	1.12420080430679	0.899096723156445	1.14162135230818	1.11176495411964	1.28709092081456	1.12220545619172	1.23868754495695	1.04752200145845	1.24488867085526	1.22422126822466	1.03351159607105	1.24914919803556	1.17518590225335	1.29419495558673	1.13565464312391	1.30132334261624	1.26013279969074	1.26184670151394	1.30842737738841
ABO5	2.25819770581893	2.11136339371315	2.29234630175151	2.01501152447757	1.96767770862454	2.37817598744521	1.96710425675729	2.02877169705574	1.65029699867445	1.96130740752415	2.43943503795382	2.61625804218472	2.42062501580694	2.43568180153179	2.31520220584239	2.49173846411347	2.45915619087278	2.21434694416859	2.5019704297436	2.26908107295226	2.64454213000631	2.53494289464643	2.65877281219394	2.54450115091864	2.53664297084224	2.68191534353364
ABO6	2.70213878032219	2.26742499665929	2.51090776998119	2.08799280370061	1.83509966537362	2.5889792686814	2.1361160871355	2.13465328312503	1.51796897338765	2.03326592018322	2.90160801918462	3.26911437116549	2.94337159142832	2.94829242651928	2.44480698724991	2.87883872875392	2.78345788261755	2.28045575485259	2.87027873633407	2.40417746979583	3.2845139074952	3.03123414977117	3.35660728058187	3.05801586518475	2.93485109222009	3.37200681691158
MBE1	2.53303295266152	2.23226115050729	2.51326086048506	2.11654228783122	1.63531963413802	2.17801898319213	1.92358871646425	1.9677606983946	1.55138620952708	1.90065632648296	2.65800409129584	2.86266426243848	2.63505163641344	2.74128386847239	2.33897087927958	2.64461344647652	2.31307996973044	2.05781671062017	2.4136125951351	2.26129058825741	2.88561671732088	2.6774892188967	2.88214939003934	2.78401741051419	2.49314849332852	2.90510184492174
MBE2	2.19236143121223	1.632376894378	1.91085567234624	1.53608024420824	1.59430220951264	2.15046887416223	1.76638909413331	1.54728522081248	1.09346743024634	1.46308547055049	2.27804955012626	2.57484969442482	2.29313451587522	2.07209493071265	1.7636669203277	2.02000501665037	2.28151790634866	1.91306008201198	2.29172674672474	1.70721306347141	2.61229170432451	2.37540271228099	2.64334629710991	2.15803897844684	2.39446705876653	2.67736838450134
MBE3	2.69481905365592	2.25152807316618	2.55225167787744	2.11702505776872	1.70663684889775	2.35046130611951	1.8679549642404	1.88730515951016	1.43983412712257	1.76308279782398	2.82273068026455	3.05589389044298	2.87747894362702	2.74516427388923	2.46510656203785	2.77393400959166	2.54597876336033	2.15620911766892	2.58173503697205	2.20823754212266	3.11306066822112	2.96322911029423	3.21358788683424	2.9260473484091	2.73965729925412	3.23677696496285
MBE4	2.35604635037311	2.01485960737088	2.06286518699569	1.88549368074705	1.79333378018901	2.51283335368464	2.09063248219666	2.13920037291121	1.57519458222132	2.02188696247273	2.50313100861028	2.87283503785486	2.58521787454389	2.59556183295756	2.20165983101673	2.48237453332261	2.6744920883811	2.22479067509376	2.77286487973182	2.36584673469539	2.98961866393059	2.67381563975906	3.02480288715509	2.70496552453454	2.84312895963981	3.06670889803119
MBE5	2.54863614902436	2.07692449240126	2.44571076903745	2.07945328241758	1.65491830318714	2.49925761110269	2.01110770534641	2.11004274321243	1.43527073777798	2.16784468433865	2.58220907713365	3.13108401659682	2.65944136326989	2.80233747468107	2.25106112614018	2.80424294372719	2.63846373225368	2.12657838521185	2.76617144959655	2.40287978741406	3.14692444320581	2.69301429137918	3.16644971589763	2.8981710669487	2.85895733319819	3.18229014250662
MBE6	1.88143513278139	1.35313941079807	1.65882510728587	1.35996248146945	1.60370570494637	2.09109669351302	1.75676893694534	1.78496933245873	1.15388555342633	1.77695366880073	1.97794862399796	2.40100826347351	2.03299188861573	2.0667019832215	1.50252971049132	2.05298422550388	2.27402900625649	1.83199307154515	2.34251975612763	1.95359007374153	2.46454606379782	2.06916321410802	2.48908992693519	2.16531768440793	2.37308852170177	2.49990886463992
