# Supplementary material
Source: MDPI journal article supplement (https://www.mdpi.com/2072-4292/14/10/2394)
Supplement: s1 [file s1 › ESM8_fish_functional_distrib_log_biom.csv]

site	diets_size	diets_hrange	diets_school	diets_lwater	size_hrange	size_school	size_lwater	hrange_school	hrange_lwater	school_lwater	diets_size_hrange	diets_size_school	diets_size_lwater	diets_hrange_school	diets_hrange_lwater	diets_school_lwater	size_hrange_school	size_hrange_lwater	size_school_lwater	hrange_school_lwater	diets_size_hrange_school	diets_size_hrange_lwater	diets_size_school_lwater	diets_hrange_school_lwater	size_hrange_school_lwater	diets_size_hrange_school_lwater
RKIOSFR	2.90931506385352	2.59288284439205	2.89325396997184	2.38793084435278	2.18409603050768	2.66566042242421	2.18084050588927	2.09916577903749	1.64393719249864	2.17420386538438	3.12950937005406	3.40503995804566	3.03495581500874	3.13227547671032	2.7435100070069	3.01799046681547	2.90866989313175	2.48480682756259	2.91942533903573	2.49010819267578	3.51519059664452	3.20141931710264	3.45363022958808	3.19285877576279	3.11427800678316	3.53937452707993
RVARGFR	2.86677618017274	2.54388659442554	2.81609200445699	2.33154188940623	2.16584013256391	2.65077143222716	2.16211620582493	2.14344869806273	1.58651214735344	2.10434991613017	3.09107924649136	3.38311814528133	3.02031396784854	3.09174152691363	2.72339180561398	2.95565198945811	2.87199612626089	2.4702162029812	2.91223172907105	2.5212315368726	3.46035678342016	3.18498915554219	3.43884840729197	3.15566369930566	3.09314860579871	3.49511776820435
RIGESFR	2.76867380050231	2.37883739132284	2.69465419686302	2.09962753877153	2.19561929868843	2.53858481604946	2.06192891936691	2.04495650914124	1.50344038311562	1.94250940914628	2.95592476211913	3.20630111769415	2.84825499904977	2.96330397933761	2.46354319961798	2.78662484664942	2.79148963155748	2.40902320400602	2.71546242623624	2.3793641919866	3.27748844814592	3.00533260576603	3.24844035315268	2.98951584744599	2.94297031738205	3.29713739457881
RCOPAFR	2.85128405454029	2.4875449990938	2.71979833716197	2.18424762032552	2.20897689878707	2.73330476838334	2.05602547764038	2.2470289659458	1.57032194574908	1.98473871906033	3.02729563200686	3.33875674573794	2.9432592370707	3.03458860962966	2.58305902683012	2.81106211108967	2.93835589921672	2.50906119483343	2.86427927548214	2.49781769999919	3.39436469736386	3.07319627079058	3.3714534339301	3.09062626883959	3.04509502694943	3.41465702198366
EUR1	3.05492257420029	2.75963059136189	2.9063886796735	2.46752717211712	2.61594189294032	2.91898811334982	2.46905572383251	2.4709194298726	1.93643046231676	2.28204901950697	3.43736492931934	3.55431651208289	3.28043034395108	3.29730598316934	3.04567259728892	3.17870223868801	3.2254955922786	2.94342865990583	3.13328723519287	2.84318437816243	3.73936145074007	3.52460595199391	3.65821774537203	3.44490504931448	3.35532651501919	3.77256514309413
EUR2	3.09502754310147	2.61345623879766	2.91359700991661	2.54144829588485	2.52044101918213	2.89978442168923	2.52998409588988	2.28133331406538	1.7760834405682	2.27776946298078	3.35957450331213	3.63480591290387	3.41716859743816	3.24243677092258	2.99662224618585	3.15005851204841	3.21058844807755	2.90599530194961	3.23906338299835	2.84218037879081	3.72479237741426	3.55949675956903	3.76992632666876	3.40570546276847	3.4086756503436	3.82442680347724
EUR3	2.99970669138121	2.61939565722823	2.85959029733432	2.33663384149881	2.43889157745857	2.85300196383507	2.27988866771461	2.27989427487321	1.59278526801873	2.23255072316451	3.28162694462188	3.55216193214872	3.11965138289083	3.29124487122771	2.72044302657767	2.99241609918502	3.12166101780705	2.59557248218937	2.93847902970442	2.50891068585607	3.67058628184528	3.33770426024071	3.59493278321144	3.3122242372451	3.18514013444448	3.68079752638078
EUR7	2.90591483555392	2.63323823375048	2.82882543180403	2.5359183478178	2.37834949106434	2.92471102691264	2.45550661714354	2.45941468098789	1.92366874699522	2.37253273832489	3.30890996235391	3.53539832776426	3.27356383326808	3.21412698433184	3.04805660518895	3.07872316983284	3.1983286222582	2.80310606270863	3.16450281952386	2.88247056580825	3.65947218126642	3.51277765276891	3.64796993931148	3.37204674639809	3.34388175544597	3.7373812434632
EUR8	3.15954076720998	2.67567758287127	3.07869299392772	2.54320592580857	2.57983588958207	2.93918781257455	2.5269562302287	2.45577124873376	1.7786924632106	2.37239404020941	3.43607799225901	3.69785581899328	3.5512239885755	3.37767907849008	2.98769559383189	3.28130954843429	3.27337846440336	2.95005286459243	3.40309040662277	2.93668150691188	3.80261714222015	3.64951759049973	3.85955653325587	3.48934210253596	3.54900739918702	3.90654828369431
EUR9	3.0500461216152	2.56641584210838	2.90349428671119	2.45813535509816	2.52795770164147	2.90891415183711	2.38947969517858	2.46929925572757	1.78758028815872	2.28516470045798	3.33049155176388	3.61899498823664	3.3075366607746	3.25427984537232	2.85142570093605	3.14104507680874	3.21064990670257	2.85408794324276	3.2022510598349	2.83512724910842	3.711430849575	3.47307342268468	3.72811692572496	3.37619820430653	3.36901200601711	3.79003007849759
EUR10	3.0087970719497	2.37924638950437	2.848135265727	2.37755731151468	2.36670198960986	2.7145328964143	2.27943292675847	2.36747098782927	1.59552276945174	2.1696607897032	3.21651069304171	3.53359073050337	3.29498499916502	3.13418356446359	2.68428813309825	3.00592414704213	3.08318187689013	2.79577104669351	2.99725428418777	2.67792342442509	3.63013879200613	3.39464267629759	3.6150361582889	3.21634429997224	3.24589510385698	3.7047589983766
EUR11	2.91675056804115	2.55148298641719	2.85770780232407	2.47609165251696	2.54759640755652	2.86712068086997	2.47109700927109	2.286553040429	1.78054717166893	2.28904868379225	3.2286997170965	3.46948720952048	3.20523705997872	3.14912265493924	2.87467902302228	3.01638715472291	3.1506094297479	2.86911899858643	3.12040796707667	2.7034841949228	3.60644178385714	3.37860115977234	3.56150257577305	3.23904028288046	3.27503883523273	3.66199976990896
EUR12	2.94509968823993	2.50914681876369	2.88383738778476	2.54143692702349	2.37081611382919	2.94949515306239	2.45638789697082	2.45950910146521	1.7771937493322	2.38293817440683	3.19776108269715	3.53013431615182	3.2975323650326	3.16939033966479	2.91614584937565	3.08344388080305	3.16518159858127	2.78911037643521	3.22035791788254	2.83162028497869	3.59849864821151	3.41920639015696	3.6204496037837	3.30149921792319	3.35143626659341	3.68101448000407
ENT1	3.16212598753302	2.74199082477503	3.1675191228166	2.55255450412917	2.45163812192389	2.99799834461525	2.45493908085474	2.5396500150348	2.06562536414135	2.38510613151341	3.47017189989603	3.74328127929014	3.35706715748595	3.52452086310012	2.97645697190599	3.38693466238785	3.39225996063415	3.01451825540691	3.29741097252088	3.05142745879316	3.86956237856216	3.59104637066848	3.8145735930443	3.61315615298613	3.57360390128713	3.91282872924923
ENT2	2.96855942209204	2.70651493253152	3.0972499491774	2.55448686827809	2.25825941858878	2.99372838345817	2.4579253889274	2.6028812170485	2.05714402305346	2.42444906552177	3.17559023886098	3.62004659965074	3.20581005422086	3.4797058881189	3.00580777735598	3.31837139454297	3.16564997584238	2.73941244504704	3.29883930302985	3.01907002447975	3.62004659965074	3.30229455044535	3.66729995368479	3.53370696938273	3.36416952377082	3.66729995368479
ENT3	3.01099113606737	2.71595896245348	3.00419923538263	2.61538080485155	2.27793519613243	2.96155662514016	2.47227519870065	2.55181146640427	1.93255639492948	2.34840261014412	3.27857750531467	3.66778662703927	3.3550915562493	3.33125578822568	2.97469274125828	3.23889042337488	3.21692123189664	2.87181069439133	3.28878241394449	2.89478634333726	3.66778662703927	3.46335119944054	3.77575197060523	3.44964595275545	3.38160718378988	3.77575197060523
ENT4	2.8436623436782	2.73020905901306	2.942222474778	2.58344767855013	2.28001147263703	2.88791580796361	2.44352843674309	2.45249003419814	2.05594064982989	2.41827778899352	3.20847388824048	3.34463065750447	3.20456442472591	3.19845622768139	2.99251514960213	3.06266216270733	3.17294117856045	2.79917288130527	3.02994908388511	2.92944905867431	3.49822659525551	3.35274061729385	3.37155791014991	3.26445142887092	3.20424673690335	3.49822659525551
GNL1	2.95294625023809	2.54284087511394	3.00043130946647	2.45687804353319	2.16156668141948	2.89550005512557	2.54211025070742	2.37309712697401	1.9122681512658	2.32748187102726	3.13793317199147	3.60646273449241	3.25262139668048	3.29248852032055	2.84706309390552	3.15847898365832	3.04260871566563	2.74908494365886	3.19864966547494	2.76260700917554	3.6569856151235	3.32707926801534	3.72139385286706	3.40726088468078	3.3070313007079	3.76705783322484
GNL2	2.99620792266803	2.41371826378975	2.88134662373138	2.38668626302825	2.28651886057979	2.80203308749398	2.54379569798997	2.34843031138679	1.57296793274332	2.24647951005403	3.17709534659877	3.49512976115571	3.18208822941707	3.0746311202937	2.6101778331278	3.04089986590855	3.04449368022529	2.67268576585113	3.01974214297323	2.52781700253481	3.5038823306969	3.21530955868015	3.5038823306969	3.17334717407061	3.18197342743263	3.5038823306969
ABO1	3.0281616487759	2.67567662639246	2.89510963787175	2.5764860107569	2.42945480507968	2.99150801469894	2.52217009716151	2.52406008390203	1.78524012411488	2.4559849387825	3.30572968134846	3.56413842584644	3.31136866011587	3.26281842680789	3.02231962831829	3.18872259922706	3.1971672345101	2.89507961058123	3.30006162680128	2.94333172471985	3.64261810586921	3.49390675811444	3.69460380346301	3.42733059882908	3.42951644495838	3.7406722373698
ABO2	2.55652965505298	2.22077541183103	2.79076956897505	2.50701516400593	2.05405947829772	2.65964238342062	2.3375515370022	2.13611367588226	1.56774312907312	2.21796321378654	2.69262003044212	3.0935188724615	2.90538480450476	2.8483262817296	2.54689093488504	3.03435050114737	2.78343609160555	2.42675290525719	2.93161575645894	2.39485166448231	3.0935188724615	2.90538480450476	3.24254263458413	3.03435050114737	2.97947734461406	3.24254263458413
ABO3	2.98146483295868	2.53473344851717	2.89297635315801	2.34752077818853	2.23963500174168	2.83364275126242	2.49734043540746	2.45260980871027	1.92492839493865	2.35622374688046	3.14722702418545	3.47071497742243	3.20578511325769	3.18544362893615	2.75249455541142	3.13775737746137	3.02733665955953	2.71702842475396	3.1241086379732	2.73666485426954	3.49063010344842	3.30759721693745	3.56838102923057	3.31454497007877	3.19664975922659	3.58682581887605
ABO4	2.81277792117646	2.33602759084475	2.77371719973624	2.43579700799172	2.06123561993416	2.64231032882806	2.36899571037556	2.15853327942125	1.59182973574499	2.34218243866324	2.95943132810033	3.31586989304043	3.09424537227289	2.97072476658352	2.67753704201599	3.07641745397991	2.82390139191429	2.45463507102781	3.00373171215402	2.54231893481051	3.35133227130448	3.17312700924721	3.4439323357292	3.16825823305483	3.09169628469761	3.47527870523877
ABO5	3.01554980455917	2.60780118104033	2.90725737556025	2.64271045625822	2.29325560497409	2.93284748254484	2.44253507800624	2.42070123388389	1.90654016036519	2.43723513739198	3.14463266192409	3.4515169863389	3.21280971312007	3.16784578450092	2.89941706368979	3.2044902627337	3.15014199636089	2.79508883233754	3.20367022764759	2.83833108850065	3.51005357537827	3.32257963428963	3.532690936658	3.30484189665377	3.30543585327742	3.58754285784046
ABO6	3.11341998846489	2.60282566794997	2.94649209851881	2.40066162205518	2.32286130375518	2.88965600611676	2.49807820205506	2.34943453075908	1.77513123906657	2.34069030653295	3.27325210229487	3.63334370747338	3.39005980493072	3.26732948694174	2.87454494744206	3.18447638385151	3.07143048401399	2.77354691435176	3.20435076502633	2.72790104515855	3.6537977751945	3.45524939512195	3.73825315089841	3.38768984922771	3.27120526062315	3.75691308134675
MBE1	2.98400835285951	2.52267809895661	2.93751184693407	2.44243500986527	2.14675665658797	2.65438337571336	2.33921501932164	2.37637195949703	1.76892069423549	2.26647943431153	3.15833274249753	3.39879147616774	3.11905850037808	3.23486510630214	2.72267934474157	3.07697079782349	2.93378181352478	2.58834839540434	2.94197503923739	2.72618305916303	3.4261782725188	3.19543223994206	3.42854785765395	3.27010416096738	3.11701474991745	3.45527191586534
MBE2	2.97599127275549	2.52564135573453	2.84372815009147	2.40603795311382	2.15922446646057	2.71443690420846	2.42063907506601	2.26709145664835	1.75722780406816	2.17184754420057	3.11583578044796	3.47014123886224	3.17667563977198	3.14822273890239	2.8160499781822	3.05623493465388	2.94782130734015	2.640564741013	3.01865117524718	2.56971514829321	3.53134056099644	3.29132610044417	3.60069220226375	3.28625860637469	3.15242778427107	3.65350090782253
MBE3	3.0380171557145	2.45841192769873	2.89236376654856	2.42648104161693	2.34728934108014	2.65512107038411	2.24172257170703	2.27598030018081	1.92336065067989	2.1591298624504	3.20785043305382	3.48177912755967	3.23317225989554	3.07879254268372	2.78270593663919	3.11649176379613	2.95183085498968	2.73049938930967	2.98413871155542	2.67609872174919	3.5379598395311	3.34335187951172	3.61228941968671	3.26997184284899	3.20848365808003	3.63817544631375
MBE4	3.0139979965242	2.65912399209893	2.87340274451064	2.51164489677198	2.23628611807779	2.93143191231374	2.57679997902557	2.59311370351175	1.92039791046831	2.45928230937339	3.2574751863046	3.52386764313938	3.32906200152257	3.25778525446586	2.99043919925527	3.15723902456702	3.23687578780857	2.88929775190205	3.3043389793778	2.95168280740036	3.65714049081125	3.51389804182251	3.68222979602703	3.42908455140988	3.46598017839966	3.774856247984
MBE5	3.00540523165392	2.45842001784576	2.87493937953605	2.52927276427615	2.13874279718817	2.78715490820239	2.37999728890982	2.26412816576585	1.74761380194669	2.35616150406413	3.05214583506683	3.5266595665217	3.19668294948748	3.19540199645826	2.7607059883789	3.17335975322355	3.00530423604347	2.54140827645541	3.15630677956754	2.65865792311493	3.55523365428909	3.23596965990765	3.59599508715606	3.32463529446103	3.23771382834315	3.62278879977758
MBE6	2.92395687588405	2.45780908851429	2.84088294585046	2.48836428323531	2.3345098879123	2.92732329856331	2.57943642444993	2.59661572322717	1.78170284618468	2.4554070320584	3.15111029758178	3.56620857768159	3.21186306341909	3.30287343170128	2.76694645926063	3.1640516451426	3.23026204958857	2.8270936112582	3.34803651447897	2.97008894745349	3.68983927477024	3.32019129197809	3.70264841612067	3.46123553135458	3.44010694694837	3.74699332803061
